# Supplementary material for: Cobalt-catalyzed arylation of aldimines via directed C–H bond functionalization: addition of 2-arylpyridines and self-coupling of aromatic aldimines
Source: Royal Society of Chemistry journal article supplement (doi:10.1039/c2cc31114c), 2012-01-01

## Supplementary Information

### Cobalt-catalyzed arylation of aldimines via chelation-assisted C–H bond functionalization

Ke Gao and Naohiko Yoshikai\*

*Division of Chemistry and Biological Chemistry, School of Physical and Mathematical Sciences,  
Nanyang Technological University  
Singapore 637371, Singapore*

#### Table of Contents

|                                                                                           |            |
|-------------------------------------------------------------------------------------------|------------|
| <b>Materials and Methods .....</b>                                                        | <b>S2</b>  |
| <b>Optimization of Reaction Conditions .....</b>                                          | <b>S3</b>  |
| <b>Addition of 2-Arylpyridine to Aromatic Aldimine (Table 1) .....</b>                    | <b>S4</b>  |
| <b>Formation of Isoindolinones via Self-Coupling of Aldimine (Scheme 2) .....</b>         | <b>S12</b> |
| <b>Synthesis of Indenones via Self-Coupling of Aldimines (Scheme 2 and Table 2) .....</b> | <b>S13</b> |
| <b>Proposed Mechanism for the Formation of Indenone .....</b>                             | <b>S21</b> |
| <b>NMR Spectra .....</b>                                                                  | <b>S22</b> |

## Materials and Methods

**General.** All reactions dealing with air- or moisture-sensitive compound were performed by standard Schlenk techniques in oven-dried reaction vessels under nitrogen atmosphere. Analytical thin-layer chromatography (TLC) was performed on Merck 60 F254 silica gel plates. Flash chromatography was performed using 40–63  $\mu\text{m}$  silica gel (Si 60, Merck).  $^1\text{H}$  and  $^{13}\text{C}$  nuclear magnetic resonance (NMR) spectra were recorded on Bruker AV-400 (400 MHz) NMR spectrometer.  $^1\text{H}$  and  $^{13}\text{C}$  NMR spectra are reported in parts per million (ppm) downfield from an internal standard, tetramethylsilane (0 ppm) and  $\text{CHCl}_3$  (77.0 ppm), respectively. Gas chromatographic (GC) analysis was performed on a Shimadzu GC-2010 system equipped with an FID detector and a capillary column, DB-5 (Agilent J&W, 0.25 mm i.d. x 30 m, 0.25  $\mu\text{m}$  film thickness). Gas chromatography–mass spectrometry (GC–MS) analysis was performed on a Shimadzu GCMS-QP2010 system equipped with a capillary column, Rxi<sup>®</sup>-5Sil MS (Restek, 0.25 mm i.d. x 30 m, 0.25  $\mu\text{m}$  film thickness). High-resolution mass spectra (HRMS) were obtained with a Q-ToF Premier LC HR mass spectrometer. Melting points were measured on a Büchi M-565 apparatus and uncorrected.

**Materials.** Unless otherwise noted, commercial reagents were purchased from Aldrich, Alfa Aesar, and other commercial suppliers and were used as received. Anhydrous cobalt(II) bromide (>99%) was purchased from Alfa Aesar, and was used as received. THF was distilled over Na/benzophenone. Grignard reagents except MeMgCl (purchased from Aldrich) were prepared from the corresponding halides and magnesium turnings in anhydrous THF and titrated before use. The 2-arylpyridine derivatives were prepared by nickel-catalyzed cross-coupling according to the procedure reported by Mongin et al.<sup>1</sup> The aldimines were prepared by condensation of the corresponding aldehydes and aniline or *p*-anisidine in EtOH.

## Optimization of Reaction Conditions

**Table S1.** Screening conditions for the reaction of **1a** with **2a** or **2b**<sup>a</sup>

**1a** + **2a** (R = Ph)  
**2b** (R = 4-MeOC<sub>6</sub>H<sub>4</sub>)

| Entry           | Imine     | Ligand    | RMgX                                   | Yield (%) <sup>b</sup> |
|-----------------|-----------|-----------|----------------------------------------|------------------------|
| 1               | <b>2a</b> | IPr•HCl   | <i>t</i> BuCH <sub>2</sub> MgBr        | 84 <sup>c</sup>        |
| 2 <sup>d</sup>  | <b>2b</b> | IPr•HCl   | <i>t</i> BuCH <sub>2</sub> MgBr        | 81 <sup>c</sup>        |
| 3               | <b>2a</b> | IMes•HCl  | <i>t</i> BuCH <sub>2</sub> MgBr        | 21                     |
| 4               | <b>2a</b> | <b>L1</b> | <i>t</i> BuCH <sub>2</sub> MgBr        | <1                     |
| 5               | <b>2a</b> | <b>L2</b> | <i>t</i> BuCH <sub>2</sub> MgBr        | <1                     |
| 6               | <b>2a</b> | IPr•HCl   | MeMgCl                                 | 14                     |
| 7               | <b>2a</b> | IPr•HCl   | <i>n</i> BuMgBr                        | 2                      |
| 8               | <b>2a</b> | IPr•HCl   | <i>i</i> PrMgBr                        | 2                      |
| 9               | <b>2a</b> | IPr•HCl   | Me <sub>3</sub> SiCH <sub>2</sub> MgCl | 4                      |
| 10 <sup>e</sup> | <b>2a</b> | IPr•HCl   | <i>t</i> BuCH <sub>2</sub> MgBr        | 0                      |

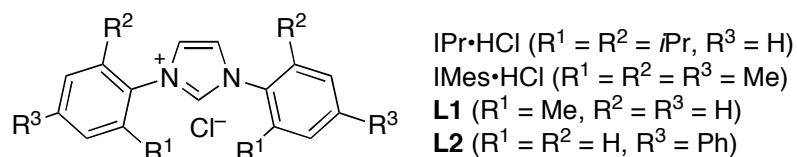

<sup>a</sup> The reaction was performed on a 0.3 mmol scale. <sup>b</sup> Determined by GC using *n*-tridecane as an internal standard. <sup>c</sup> Isolated yield. <sup>d</sup> CoCl<sub>2</sub> was used instead of CoBr<sub>2</sub>. The reaction time was 24 h. <sup>e</sup> CoBr<sub>2</sub> was omitted from the reaction.

## Addition of 2-Arylpyridine to Aromatic Aldimine (Table 1)

**A Typical Procedure: 4-Methoxy-*N*-(phenyl(2-(pyridin-2-yl)phenyl)methyl)aniline (3b).** In a Schlenk tube were placed  $\text{CoCl}_2$  (3.9 mg, 0.030 mmol),  $\text{IPr}\cdot\text{HCl}$  (12.8 mg, 0.030 mmol), 2-phenylpyridine (**1a**, 43  $\mu\text{L}$ , 0.30 mmol), and THF (0.64 mL). To the mixture was added a THF solution of *t*BuCH<sub>2</sub>MgBr (0.63 M, 0.86 mL, 0.54 mmol) dropwise at 0 °C. After stirring for 30 min, (*E*)-*N*-benzylidene-4-methoxyaniline (**2b**, 76.1 mg, 0.36 mmol) was added. The resulting mixture was stirred at 60 °C for 24 h, and then allowed to room temperature. The reaction was quenched by sequential addition of Et<sub>2</sub>O (1 mL) and saturated aqueous solution of NH<sub>4</sub>Cl (1 mL). The aqueous layer was extracted with ethyl acetate (3 x 10 mL). The combined organic layer was dried over MgSO<sub>4</sub> and concentrated under reduced pressure. The crude product was purified by silica gel chromatography (eluent: hexane/EtOAc/Et<sub>3</sub>N = 10/1/0.1) to afford the title compound as a brown oil (89.0 mg, 81 %).

**3b:**  $R_f$  0.17 (hexane/EtOAc = 5/1); <sup>1</sup>H NMR (400 MHz, CDCl<sub>3</sub>):  $\delta$  3.71 (s, 3H), 4.28 (brs, 1H), 5.88 (s, 1H), 6.51 (d,  $J$  = 8.8 Hz, 2H), 6.71 (d,  $J$  = 8.8 Hz, 2H), 7.13-7.22 (m, 7H), 7.36-7.40 (m, 3H), 7.53-7.59 (m, 2H), 8.65 (d,  $J$  = 4.0 Hz, 1H); <sup>13</sup>C NMR (100 MHz, CDCl<sub>3</sub>):  $\delta$  55.8, 59.7, 114.6, 114.8, 122.0, 124.4, 126.9, 127.4, 127.7, 128.2, 128.4, 128.9, 130.2, 136.4, 140.5, 141.2, 141.8, 143.1, 149.1, 152.0, 159.7; HRMS (ESI) Calcd for C<sub>25</sub>H<sub>23</sub>N<sub>2</sub>O [M + H]<sup>+</sup> 367.1810, found 367.1812.

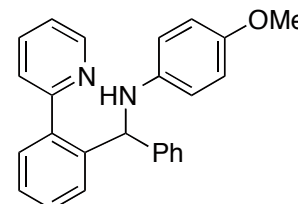

***N*-(Phenyl(2-(pyridin-2-yl)phenyl)methyl)aniline (3a):** The typical procedure was applied to 2-phenylpyridine (**1a**, 43  $\mu\text{L}$ , 0.30 mmol) and (*E*)-*N*-benzylideneaniline (**2a**, 65.2 mg, 0.36 mmol) using CoBr<sub>2</sub> (6.6 mg, 0.030 mmol) at 60 °C for 6 h. Silica gel chromatography (eluent: hexane/EtOAc/Et<sub>3</sub>N = 10/1/0.1) of the crude product afforded the title compound as a yellow oil (84.3 mg, 84 %).

$R_f$  0.15 (hexane/EtOAc = 10/1); <sup>1</sup>H NMR (400 MHz, CDCl<sub>3</sub>):  $\delta$  4.56 (brs, 1H), 6.01 (s, 1H), 6.58(d,  $J$  = 8.0 Hz, 2H), 6.70 (t,  $J$  = 7.2 Hz, 1H), 7.11-7.23 (m, 9H), 7.39-7.44 (m, 3H), 7.55-7.59 (m, 2H), 8.66-8.67 (m, 1H); <sup>13</sup>C NMR (100 MHz, CDCl<sub>3</sub>):  $\delta$  59.0, 113.5, 117.4, 122.0, 124.3, 127.0, 127.4, 127.7, 128.2, 128.4, 128.9, 129.2, 130.3, 136.4, 140.5, 141.0, 142.9, 147.4, 149.1, 159.6; HRMS (ESI) Calcd for C<sub>24</sub>H<sub>21</sub>N<sub>2</sub> [M + H]<sup>+</sup> 337.1705, found 337.1702.

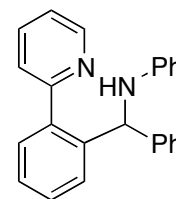

**4-Methoxy-*N*-((5-methoxy-2-(pyridin-2-yl)phenyl)(phenyl)methyl)aniline (3c):** The typical procedure was applied to 2-(4-methoxyphenyl)pyridine (**1b**, 55.6 mg, 0.30 mmol) and (*E*)-*N*-benzylidene-4-methoxyaniline (**2b**, 76.1 mg, 0.36 mmol) for 14 h. Silica gel chromatography (eluent: hexane/EtOAc/Et<sub>3</sub>N = 10/1/0.1–5/1/0.1) of the crude product afforded the title compound as a dark brown oil (90.4 mg, 76%).

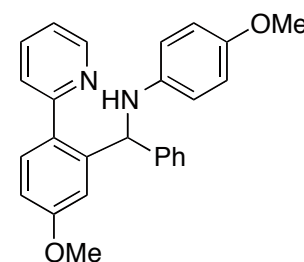

$R_f$  0.15 (hexane/EtOAc = 5/1); <sup>1</sup>H NMR (400 MHz, CDCl<sub>3</sub>): δ 3.71 (s, 3H), 3.79 (s, 3H), 4.28 (brs, 1H), 5.92 (s, 1H), 6.52 (app.d,  $J$  = 6.8 Hz, 2H), 6.71 (app.d,  $J$  = 6.8 Hz, 2H), 6.89 (dd,  $J$  = 8.4, 2.0 Hz, 1H), 7.12–7.26 (m, 8H), 7.34 (d,  $J$  = 8.4 Hz, 1H), 7.53–7.57 (m, 1H), 8.61–8.63 (m, 1H); <sup>13</sup>C NMR (100 MHz, CDCl<sub>3</sub>): δ 55.4, 55.8, 59.7, 112.2, 114.1, 114.7, 114.8, 121.7, 124.4, 127.0, 127.7, 128.4, 131.6, 133.2, 136.3, 141.8, 142.9, 143.0, 149.1, 152.1, 159.5, 160.0; HRMS (ESI) Calcd for C<sub>26</sub>H<sub>25</sub>N<sub>2</sub>O<sub>2</sub> [M + H]<sup>+</sup> 397.1916, found 397.1921.

***N*-((5-Fluoro-2-(pyridin-2-yl)phenyl)(phenyl)methyl)-4-methoxyaniline (3d):** The typical procedure was applied to 2-(4-fluorophenyl)pyridine (**1c**, 52.0 mg, 0.30 mmol) and (*E*)-*N*-benzylidene-4-methoxyaniline (**2b**, 76.1 mg, 0.36 mmol) for 14 h. Silica gel chromatography (eluent: hexane/EtOAc/Et<sub>3</sub>N = 10/1/0.1) of the crude product afforded the title compound as a dark brown oil (73.3 mg, 64%).

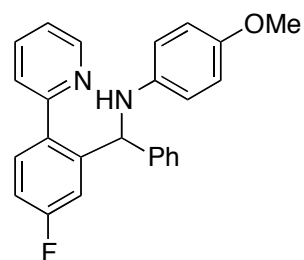

$R_f$  0.15 (hexane/EtOAc = 5/1); <sup>1</sup>H NMR (400 MHz, CDCl<sub>3</sub>): δ 3.71 (s, 3H), 4.12 (brs, 1H), 5.88 (s, 1H), 6.52 (app.d,  $J$  = 6.8 Hz, 2H), 6.71 (app.d,  $J$  = 6.8 Hz, 2H), 7.03–7.09 (m, 4H), 7.16–7.21 (m, 4H), 7.32–7.36 (m, 2H), 7.55–7.59 (m, 1H), 8.62–8.64 (m, 1H); <sup>13</sup>C NMR (100 MHz, CDCl<sub>3</sub>): δ 55.9, 59.7, 114.3 (d, <sup>2</sup> $J_{C-F}$  = 21 Hz), 114.8, 114.90 (d, <sup>2</sup> $J_{C-F}$  = 20 Hz), 114.91, 122.2, 124.5, 127.3, 127.8, 128.6 (two signals overlapping), 132.1 (d, <sup>3</sup> $J_{C-F}$  = 8 Hz), 136.5, 141.5, 142.5, 144.1 (d, <sup>3</sup> $J_{C-F}$  = 7 Hz), 149.2, 152.3, 158.9, 163.3 (d, <sup>1</sup> $J_{C-F}$  = 246 Hz); HRMS (ESI) Calcd for C<sub>25</sub>H<sub>22</sub>FN<sub>2</sub>O [M + H]<sup>+</sup> 385.1716, found 385.1719.

**3-(((4-Methoxyphenyl)amino)(phenyl)methyl)-*N,N*-dimethyl-4-(pyridin-2-yl)aniline (3e):**

The typical procedure was applied to *N,N*-dimethyl-4-(pyridin-2-yl)aniline (**1d**, 59.5 mg, 0.30 mmol) and (*E*)-*N*-benzylidene-4-methoxyaniline (**2b**, 76.1 mg, 0.36 mmol) for 24 h. Silica gel chromatography (eluent: hexane/EtOAc/Et<sub>3</sub>N = 6/1/0.1–5/1/0.1) of the crude product afforded the title compound as a

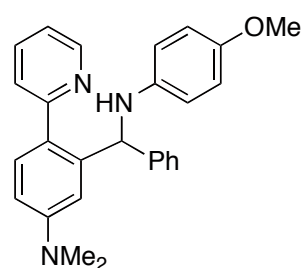

brown solid (34.2 mg, 28%).

m.p. 125.0-126.1 °C;  $R_f$  0.12 (hexane/EtOAc = 5/1);  $^1\text{H}$  NMR (400 MHz,  $\text{CDCl}_3$ ):  $\delta$  2.92 (s, 6H), 3.70 (s, 3H), 4.37 (brs, 1H), 5.92 (s, 1H), 6.51 (app.d,  $J$  = 6.8 Hz, 2H), 6.68-6.71 (m, 3H), 6.82 (d,  $J$  = 2.4 Hz, 1H), 7.09-7.18 (m, 7H), 7.26-7.31 (m, 1H), 7.52-7.54 (m, 1H), 8.57-8.59 (m, 1H);  $^{13}\text{C}$  NMR (100 MHz,  $\text{CDCl}_3$ ):  $\delta$  40.6, 55.9, 60.1, 111.2, 112.4, 114.7, 114.8, 121.2, 124.3, 126.7, 127.7, 128.3, 128.9, 131.4, 136.2, 142.1, 142.2, 143.5, 149.0, 150.9, 152.0, 160.1; HRMS (ESI) Calcd for  $\text{C}_{27}\text{H}_{28}\text{N}_3\text{O}$   $[\text{M} + \text{H}]^+$  410.2232, found 410.2230.

**4-Methoxy-*N*-((4-methyl-2-(pyridin-2-yl)phenyl)(phenyl)methyl)aniline (3f):** The typical procedure was applied to 2-(*m*-tolyl)pyridine (**1e**, 49  $\mu\text{L}$ , 0.30 mmol) and (*E*)-*N*-benzylidene-4-methoxyaniline (**2b**, 76.1 mg, 0.36 mmol) for 16 h. Silica gel chromatography (eluent: hexane/EtOAc/ $\text{Et}_3\text{N}$  = 10/1/0.1) of the crude product afforded the title compound as a brown oil (53.9 mg, 47%).

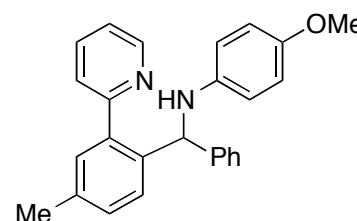

$R_f$  0.25 (hexane/EtOAc = 5/1);  $^1\text{H}$  NMR (400 MHz,  $\text{CDCl}_3$ ):  $\delta$  2.38 (s, 3H), 3.71 (s, 3H), 4.26 (brs, 1H), 5.77 (s, 1H), 6.49 (app.d,  $J$  = 6.8 Hz, 2H), 6.70 (app.d,  $J$  = 6.8 Hz, 2H), 7.13-7.22 (m, 9H), 7.38 (d,  $J$  = 8.0 Hz, 1H), 7.54-7.58 (m, 1H), 8.63-8.65 (m, 1H);  $^{13}\text{C}$  NMR (100 MHz,  $\text{CDCl}_3$ ):  $\delta$  21.2, 55.9, 59.5, 114.6, 114.8, 122.0, 124.3, 126.9, 127.8, 128.2, 128.4, 129.6, 130.9, 136.3, 137.0, 138.3, 140.4, 141.8, 143.3, 149.2, 152.0, 159.7; HRMS (ESI) Calcd for  $\text{C}_{26}\text{H}_{25}\text{N}_2\text{O}$   $[\text{M} + \text{H}]^+$  381.1967, found 381.1969.

**4-Methoxy-*N*-((3-methoxy-2-(pyridin-2-yl)phenyl)(phenyl)methyl)aniline (3g):** The typical procedure was applied to 2-(2-methoxyphenyl)pyridine (**1f**, 52  $\mu\text{L}$ , 0.30 mmol) and (*E*)-*N*-benzylidene-4-methoxyaniline (**2b**, 76.1 mg, 0.36 mmol) for 24 h. Silica gel chromatography (eluent: hexane/EtOAc/ $\text{Et}_3\text{N}$  = 10/1/0.1–3/1/0.1) of the crude product afforded the title compound as a dark brown oil (83.4 mg, 70%).

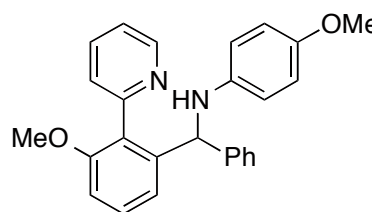

$R_f$  0.06 (hexane/EtOAc = 5/1);  $^1\text{H}$  NMR (400 MHz,  $\text{CDCl}_3$ ):  $\delta$  3.70 (s, 3H), 3.72 (s, 3H), 4.10 (d,  $J$  = 4.0 Hz, 1H), 5.31 (d,  $J$  = 4.4 Hz, 1H), 6.44 (app.d,  $J$  = 6.8 Hz, 2H), 6.67 (app.d,  $J$  = 6.8 Hz, 2H), 6.91 (d,  $J$  = 8.0 Hz, 1H), 6.96 (d,  $J$  = 7.6 Hz, 1H), 7.04-7.06 (m, 2H), 7.13-7.18 (m, 5H), 7.34 (t,  $J$  = 6.0 Hz, 1H), 7.51-7.53 (m, 1H), 8.62 (d,  $J$  = 4.0 Hz, 1H);  $^{13}\text{C}$  NMR (100 MHz,  $\text{CDCl}_3$ ):  $\delta$  55.88, 55.91, 60.2, 110.1, 114.6, 114.8, 120.0, 122.0, 126.2, 127.1, 127.8, 128.4,

129.6, 129.7, 135.8, 141.9, 142.9, 143.0, 149.4, 152.0, 156.3, 157.3; HRMS (ESI) Calcd for  $C_{26}H_{25}N_2O_2$   $[M + H]^+$  397.1916, found 397.1920.

**4-Methoxy-*N*-(phenyl(2-(pyridin-2-yl)thiophen-3-yl)methyl)aniline (3h):** The typical procedure was applied to 2-(thiophen-2-yl)pyridine (**1g**, 48.4 mg, 0.30 mmol) and (*E*)-*N*-benzylidene-4-methoxyaniline (**2b**, 76.1 mg, 0.36 mmol) for 24 h. Silica gel chromatography (eluent: hexane/EtOAc/Et<sub>3</sub>N = 10/1/0.1–7/1/0.1) of the crude product afforded the title compound as a dark brown solid (56.3 mg, 48%).

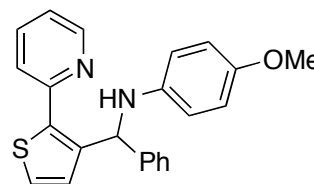

m.p. 104.1–105.9 °C;  $R_f$  0.33 (hexane/EtOAc = 5/1); <sup>1</sup>H NMR (400 MHz, CDCl<sub>3</sub>): δ 3.70 (s, 3H), 4.25 (brs, 1H), 6.17 (s, 1H), 6.52 (app.d,  $J$  = 6.8 Hz, 2H), 6.71 (app.d,  $J$  = 6.8 Hz, 2H), 7.01 (d,  $J$  = 5.2 Hz, 1H), 7.15–7.18 (m, 1H), 7.26 (t,  $J$  = 6.8 Hz, 2H), 7.31 (t,  $J$  = 7.2 Hz, 2H), 7.43 (d,  $J$  = 7.6 Hz, 2H), 7.47 (d,  $J$  = 8.0 Hz, 1H), 7.61–7.63 (m, 1H), 8.63–8.65 (m, 1H); <sup>13</sup>C NMR (100 MHz, CDCl<sub>3</sub>): δ 55.8, 57.0, 114.7, 114.9, 122.0, 122.5, 126.2, 127.3, 127.5, 128.7, 129.6, 136.9, 139.4, 141.5, 141.9, 142.9, 149.7, 152.2, 152.8; HRMS (ESI) Calcd for  $C_{23}H_{21}N_2OS$   $[M + H]^+$  373.1375, found 373.1376.

**4-Methoxy-*N*-((2-(4-methylpyridin-2-yl)phenyl)(phenyl)methyl)aniline (3i):** The typical procedure was applied to 4-methyl-2-phenylpyridine (**1h**, 50.8 mg, 0.30 mmol) and (*E*)-*N*-benzylidene-4-methoxyaniline (**2b**, 76.1 mg, 0.36 mmol) for 24 h. Silica gel chromatography (eluent: hexane/EtOAc/Et<sub>3</sub>N = 6/1/0.1) of the crude product afforded the title compound as a brown solid (76.5 mg, 67%).

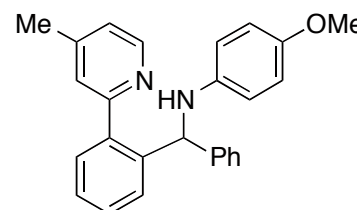

m.p. 126.4–127.3 °C;  $R_f$  0.20 (hexane/EtOAc = 5/1); <sup>1</sup>H NMR (400 MHz, CDCl<sub>3</sub>): δ 2.35 (s, 3H), 3.71 (s, 3H), 4.26 (brs, 1H), 5.85 (s, 1H), 6.49 (app.d,  $J$  = 6.8 Hz, 2H), 6.70 (app.d,  $J$  = 6.8 Hz, 2H), 7.09 (d,  $J$  = 8.0 Hz, 1H), 7.16–7.21 (m, 5H), 7.35–7.41 (m, 4H), 7.49–7.51 (m, 1H), 8.48 (dd,  $J$  = 1.4, 0.6 Hz, 1H); <sup>13</sup>C NMR (100 MHz, CDCl<sub>3</sub>): δ 18.3, 55.8, 59.6, 114.6, 114.8, 123.8, 126.9, 127.3, 127.7, 128.2, 128.4, 128.7, 130.2, 131.5, 136.9, 140.4, 141.2, 141.8, 143.2, 149.5, 152.0, 156.7; HRMS (ESI) Calcd for  $C_{26}H_{25}N_2O$   $[M + H]^+$  381.1967, found 381.1962.

**4-Methoxy-*N*-((5-methoxy-2-(3-methylpyridin-2-yl)phenyl)(phenyl)methyl)aniline (3j):** The typical procedure was applied to 2-(4-methoxyphenyl)-3-methylpyridine (**1i**, 56 μL, 0.30 mmol) and (*E*)-*N*-benzylidene-4-methoxyaniline (**2b**, 76.1 mg, 0.36 mmol) for 24 h. Silica gel

chromatography (eluent: hexane/EtOAc/Et<sub>3</sub>N = 6/1/0.1) of the crude product afforded the title compound as a yellow oil (62.6 mg, 51%).

*R<sub>f</sub>* 0.16 (hexane/EtOAc = 5/1); <sup>1</sup>H NMR (400 MHz, CDCl<sub>3</sub>): δ

1.63 (s, 3H), 3.70 (s, 3H), 3.80 (s, 3H), 4.32 (brs, 1H), 5.40 (s, 1H), 6.52 (brs, 2H), 6.70 (d, *J* = 8.8 Hz, 2H), 6.85 (dd, *J* = 8.4, 2.4 Hz, 1H), 6.93 (brs, 2H), 7.08-7.13 (m, 5H), 7.19-7.23 (m, 1H), 7.34 (d, *J* = 8.0 Hz, 1H), 8.45-8.47 (m, 1H); <sup>13</sup>C NMR (100 MHz, CDCl<sub>3</sub>): δ 19.0, 55.5, 55.9, 60.8, 111.9, 114.7, 114.8, 122.4, 124.9, 127.1, 127.7, 128.4, 129.2,

130.7, 132.4, 132.9, 138.0, 141.9, 142.3, 146.5, 152.1, 158.8, 159.7; HRMS (ESI) Calcd for C<sub>27</sub>H<sub>27</sub>N<sub>2</sub>O<sub>2</sub> [M + H]<sup>+</sup> 411.2073, found 411.2076.

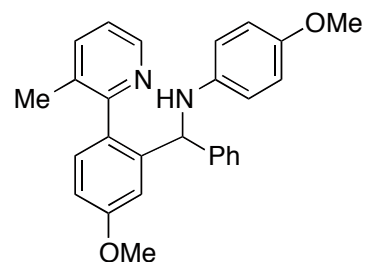

***N*-((2-(1*H*-pyrazol-1-yl)phenyl)(phenyl)methyl)aniline (3k):** The typical procedure was applied to 1-phenyl-1*H*-pyrazole (**1j**, 40 μL, 0.30 mmol) and (*E*)-*N*-benzylideneaniline (**2b**, 65.2 mg, 0.36 mmol) for 24 h. Silica gel chromatography (eluent: hexane/EtOAc/Et<sub>3</sub>N = 15/1/0.1–10/1/0.1) of the crude product afforded the title compound as a light yellow oil (59.3 mg, 61%).

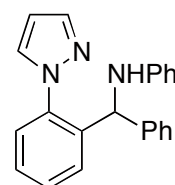

*R<sub>f</sub>* 0.42 (hexane/EtOAc = 5/1); <sup>1</sup>H NMR (400 MHz, CDCl<sub>3</sub>): δ 4.35 (d, *J* = 2.8 Hz, 1H), 5.85 (d, *J* = 3.2 Hz, 1H), 6.30 (t, *J* = 2.0 Hz, 1H), 6.50 (d, *J* = 7.6 Hz, 2H), 6.72 (t, *J* = 7.2 Hz, 1H), 7.08-7.10 (m, 2H), 7.12-7.16 (m, 2H), 7.21-7.25 (m, 4H), 7.35 (td, *J* = 7.2, 1.6 Hz, 1H), 7.41 (td, *J* = 7.2, 1.6 Hz, 1H), 7.44 (td, *J* = 7.2, 1.6 Hz, 1H), 7.69 (dd, *J* = 7.6, 1.6 Hz, 1H), 7.74 (d, *J* = 1.6 Hz, 1H); <sup>13</sup>C NMR (100 MHz, CDCl<sub>3</sub>): δ 57.6, 106.5, 113.6, 117.8, 127.2, 127.5, 127.6, 128.2, 128.59, 128.62, 129.26, 129.31, 131.2, 138.9, 139.5, 140.7, 142.1, 147.0; HRMS (ESI) Calcd for C<sub>22</sub>H<sub>20</sub>N<sub>3</sub> [M + H]<sup>+</sup> 326.1657, found 326.1658.

**4-Methoxy-*N*-((2-(pyridin-2-yl)phenyl)(*p*-tolyl)methyl)aniline (3l):** The typical procedure was applied to 2-phenylpyridine (**1a**, 43 μL, 0.30 mmol) and (*E*)-4-methoxy-*N*-(4-methylbenzylidene)aniline (**2c**, 81.1 mg, 0.36 mmol) for 24 h. Silica gel chromatography (eluent: hexane/EtOAc/Et<sub>3</sub>N = 7/1/0.1) of the crude product afforded the title compound as a dark red solid (97.3 mg, 85%).

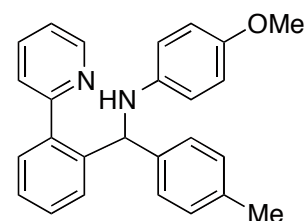

m.p. 89.3-91.6 °C; *R<sub>f</sub>* 0.25 (hexane/EtOAc = 5/1); <sup>1</sup>H NMR (400 MHz, CDCl<sub>3</sub>): δ 2.28 (s, 3H), 3.69 (s, 3H), 4.21 (brs, 1H), 5.83 (s, 1H), 6.49 (app.d, *J* = 9.2 Hz, 2H), 6.69 (app.d, *J* = 8.8 Hz, 2H), 7.02 (s, 4H), 7.18-7.23 (m, 2H), 7.33-7.39 (m, 3H), 7.53-7.56 (m, 2H), 8.62-8.64 (m, 1H);

$^{13}\text{C}$  NMR (100 MHz,  $\text{CDCl}_3$ ):  $\delta$  21.2, 55.8, 59.3, 114.6, 114.7, 122.0, 124.3, 127.2, 127.6, 128.0, 128.8, 129.1, 130.1, 136.3, 136.5, 140.1, 140.4, 141.3, 141.8, 149.1, 151.9, 159.6; HRMS (ESI) Calcd for  $\text{C}_{26}\text{H}_{25}\text{N}_2\text{O}$   $[\text{M} + \text{H}]^+$  381.1967, found 381.1970.

**4-Methoxy-*N*-((4-methoxyphenyl)(2-(pyridin-2-yl)phenyl)methyl)aniline (3m):** The typical procedure was applied to 2-phenylpyridine (**1a**, 43  $\mu\text{L}$ , 0.30 mmol) and (*E*)-4-methoxy-*N*-(4-methoxybenzylidene)aniline (**2d**, 86.9 mg, 0.36 mmol) for 24 h. Silica gel chromatography (eluent: hexane/EtOAc/ $\text{Et}_3\text{N}$  = 10/1/0.1–5/1/0.1) of the crude product afforded the title compound as a dark brown oil (92.8 mg, 78%).

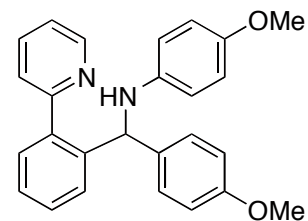

$R_f$  0.13 (hexane/EtOAc = 5/1);  $^1\text{H}$  NMR (400 MHz,  $\text{CDCl}_3$ ):  $\delta$  3.71 (s, 3H), 3.75 (s, 3H), 4.22 (brs, 1H), 5.83 (s, 1H), 6.51 (d,  $J$  = 9.2 Hz, 2H), 6.71–6.75 (m, 4H), 7.04 (d,  $J$  = 8.4 Hz, 2H), 7.15–7.20 (m, 2H), 7.35–7.40 (m, 3H), 7.56–7.60 (m, 2H), 8.65 (d,  $J$  = 4.4 Hz, 1H);  $^{13}\text{C}$  NMR (100 MHz,  $\text{CDCl}_3$ ):  $\delta$  55.3, 55.8, 59.0, 113.7, 114.6, 114.7, 121.9, 124.3, 127.2, 127.8, 128.8 (two signals overlapping), 130.1, 135.3, 136.3, 140.4, 141.3, 141.8, 149.1, 151.9, 158.5, 159.7; HRMS (ESI) Calcd for  $\text{C}_{26}\text{H}_{25}\text{N}_2\text{O}_2$   $[\text{M} + \text{H}]^+$  397.1916, found 397.1918.

***N*-((4-Fluorophenyl)(2-(pyridin-2-yl)phenyl)methyl)-4-methoxyaniline (3n):** The typical procedure was applied to 2-phenylpyridine (**1a**, 43  $\mu\text{L}$ , 0.30 mmol) and (*E*)-*N*-(4-fluorobenzylidene)-4-methoxyaniline (**2e**, 82.5 mg, 0.36 mmol) for 24 h. Silica gel chromatography (eluent: hexane/EtOAc/ $\text{Et}_3\text{N}$  = 10/1/0.1–7/1/0.1) of the crude product afforded the title compound as a brown oil (30.4 mg, 26%).

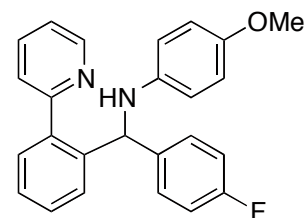

$R_f$  0.17 (hexane/EtOAc = 5/1);  $^1\text{H}$  NMR (400 MHz,  $\text{CDCl}_3$ ):  $\delta$  3.71 (s, 3H), 4.25 (brs, 1H), 5.83 (s, 1H), 6.48 (app.d,  $J$  = 9.2 Hz, 2H), 6.70 (app.d,  $J$  = 9.2 Hz, 2H), 6.86 (t,  $J$  = 8.8 Hz, 2H), 7.06–7.09 (m, 2H), 7.15 (d,  $J$  = 8.0 Hz, 1H), 7.17–7.20 (m, 1H), 7.36–7.38 (m, 3H), 7.46–7.49 (m, 1H), 7.54–7.58 (m, 1H), 8.61–8.62 (m, 1H);  $^{13}\text{C}$  NMR (100 MHz,  $\text{CDCl}_3$ ):  $\delta$  55.9, 59.0, 114.7, 114.9, 115.2 (d,  $^2J_{\text{C-F}}$  = 21 Hz), 121.1, 124.3, 127.5, 128.2, 129.0, 129.3 (d,  $^3J_{\text{C-F}}$  = 8 Hz), 130.3, 136.5, 138.9 (d,  $^4J_{\text{C-F}}$  = 3 Hz), 140.5, 141.1, 141.6, 149.1, 152.2, 159.7, 161.8 (d,  $^1J_{\text{C-F}}$  = 244 Hz); HRMS (ESI) Calcd for  $\text{C}_{25}\text{H}_{22}\text{FN}_2\text{O}$   $[\text{M} + \text{H}]^+$  385.1716, found 385.1718.

**4-Methoxy-*N*-((2-(pyridin-2-yl)phenyl)(*m*-tolyl)methyl)aniline (3o):** The typical procedure was applied to 2-phenylpyridine (**1a**, 43  $\mu\text{L}$ , 0.30 mmol) and

(*E*)-4-methoxy-*N*-(3-methylbenzylidene)aniline (**2f**, 81.1 mg, 0.36 mmol) for 13 h. Silica gel chromatography (eluent: hexane/EtOAc/Et<sub>3</sub>N = 7/1/0.1) of the crude product afforded the title compound as a dark red oil (87.8 mg, 77%).

*R<sub>f</sub>* 0.20 (hexane/EtOAc = 5/1); <sup>1</sup>H NMR (400 MHz, CDCl<sub>3</sub>): δ 2.24 (s, 3H), 3.71 (s, 3H), 4.21 (brs, 1H), 5.82 (s, 1H), 6.51 (app.d, *J* = 9.2 Hz, 2H), 6.71 (app.d, *J* = 9.2 Hz, 2H), 6.93 (s, 1H), 6.93 (d, *J* = 6.8 Hz, 1H), 6.99 (d, *J* = 7.2 Hz, 1H), 7.09 (t, *J* = 7.6 Hz, 1H), 7.16-7.21 (m, 2H), 7.36-7.40 (m, 3H), 7.53-7.58 (m, 2H), 8.65-8.66 (m, 1H); <sup>13</sup>C NMR (100 MHz, CDCl<sub>3</sub>): δ 21.5, 55.8, 59.7, 114.6, 114.8, 122.0, 124.4, 124.8, 127.3, 127.7, 128.1, 128.3, 128.4, 128.9, 130.1, 136.3, 137.9, 140.5, 141.3, 141.9, 143.0, 149.1, 152.0, 159.7; HRMS (ESI) Calcd for C<sub>26</sub>H<sub>25</sub>N<sub>2</sub>O [M + H]<sup>+</sup> 381.1967, found 381.1962.

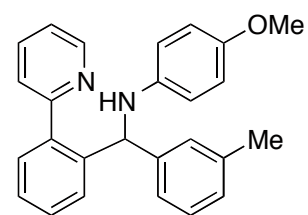

**4-Methoxy-*N*-((2-(pyridin-2-yl)phenyl)(*o*-tolyl)methyl)aniline (**3p**):** The typical procedure was applied to 2-phenylpyridine (**1a**, 43 μL, 0.30 mmol) and (*E*)-4-methoxy-*N*-(2-methylbenzylidene)aniline (**2g**, 81.1 mg, 0.36 mmol) for 24 h. Silica gel chromatography (eluent: hexane/EtOAc/Et<sub>3</sub>N = 10/1/0.1–5/1/0.1) of the crude product afforded the title compound as a light yellow solid (88.3 mg, 77%).

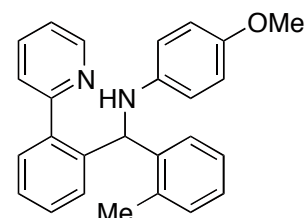

m.p. 120.0-121.3 °C; *R<sub>f</sub>* 0.19 (hexane/EtOAc = 5/1); <sup>1</sup>H NMR (400 MHz, CDCl<sub>3</sub>): δ 1.96 (s, 3H), 3.71 (s, 3H), 4.07 (brs, 1H), 5.85 (s, 1H), 6.45 (app.d, *J* = 8.8 Hz, 2H), 6.71 (app.d, *J* = 9.2 Hz, 2H), 7.05-7.06 (m, 1H), 7.10-7.15 (m, 2H), 7.14-7.17 (m, 2H), 7.25-7.27 (m, 1H), 7.36-7.39 (m, 2H), 7.43-7.46 (m, 2H), 7.50-7.52 (m, 1H), 8.60 (d, *J* = 4.4 Hz, 1H); <sup>13</sup>C NMR (100 MHz, CDCl<sub>3</sub>): δ 19.1, 55.8, 56.7, 114.1, 114.8, 121.9, 124.0, 126.0, 127.1, 127.4, 127.6, 128.2, 128.7, 130.0, 130.5, 136.2, 136.3, 139.9, 140.8, 140.9, 141.8, 149.2, 151.9, 159.5; HRMS (ESI) Calcd for C<sub>26</sub>H<sub>25</sub>N<sub>2</sub>O [M + H]<sup>+</sup> 381.1967, found 381.1972.

**4-Methoxy-*N*-((2-methoxyphenyl)(2-(pyridin-2-yl)phenyl)methyl)aniline (**3q**):** The typical procedure was applied to 2-phenylpyridine (**1a**, 43 μL, 0.30 mmol) and (*E*)-4-methoxy-*N*-(2-methoxybenzylidene)aniline (**2h**, 86.9 mg, 0.36 mmol) for 24 h. Silica gel chromatography (eluent: hexane/EtOAc/Et<sub>3</sub>N = 10/1/0.1–5/1/0.1–3/1/0.1) of the crude product afforded the title compound as a dark brown oil (62.9 mg, 53%).

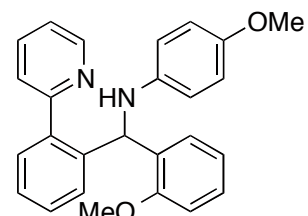

*R<sub>f</sub>* 0.13 (hexane/EtOAc = 5/1); <sup>1</sup>H NMR (400 MHz, CDCl<sub>3</sub>): δ 3.52 (s, 3H), 3.70 (s, 3H), 4.22 (brs, 1H), 5.99 (s, 1H), 6.44 (app.d, *J* = 8.8 Hz, 2H), 6.67 (app.d, *J* = 8.8 Hz, 2H), 6.72 (d, *J* =

8.0 Hz, 1H), 6.84 (t,  $J = 7.2$  Hz, 1H), 7.14-7.18 (m, 2H), 7.25-7.27 (m, 2H), 7.32-7.34 (m, 2H), 7.39-7.41 (m, 2H), 7.54-7.58 (m, 1H), 8.61-8.62 (m, 1H);  $^{13}\text{C}$  NMR (100 MHz,  $\text{CDCl}_3$ ):  $\delta$  54.1, 55.3, 55.9, 110.6, 114.5, 114.8, 120.6, 121.8, 124.1, 127.2, 128.0, 128.21, 128.24, 128.6, 130.0, 130.9, 136.0, 140.76, 140.79, 141.9, 149.2, 151.9, 156.9, 159.7; HRMS (ESI) Calcd for  $\text{C}_{26}\text{H}_{25}\text{N}_2\text{O}_2$   $[\text{M} + \text{H}]^+$  397.1916, found 397.1911.

***N*-([1,1'-Biphenyl]-2-yl(2-(pyridin-2-yl)phenyl)methyl)-4-methoxyaniline (3r):** The typical procedure was applied to 2-phenylpyridine (**1a**, 43  $\mu\text{L}$ , 0.30 mmol) and (*E*)-*N*-([1,1'-biphenyl]-2-ylmethylene)-4-methoxyaniline (**2i**, 103.4 mg, 0.36 mmol) for 48 h. Silica gel chromatography (eluent: hexane/EtOAc/ $\text{Et}_3\text{N}$  = 10/1/0.1–7/1/0.1) of the crude product afforded the title compound as a light yellow solid (46.7 mg, 35%).

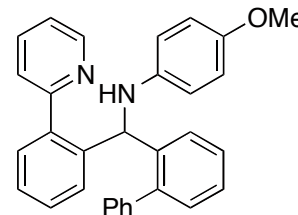

m.p. 142.1-143.1  $^{\circ}\text{C}$ ;  $R_f$  0.16 (hexane/EtOAc = 5/1);  $^1\text{H}$  NMR (400 MHz,  $\text{CDCl}_3$ ):  $\delta$  3.71 (s, 3H), 4.22 (brs, 1H), 5.69 (s, 1H), 6.41 (app.d,  $J = 8.8$  Hz, 2H), 6.67 (app.d,  $J = 8.8$  Hz, 2H), 6.73 (d,  $J = 7.6$  Hz, 1H), 6.90 (d,  $J = 7.2$  Hz, 2H), 6.99-7.01 (m, 1H), 7.12-7.16 (m, 3H), 7.20 (d,  $J = 7.6$  Hz, 1H), 7.24-7.27 (m, 3H), 7.28-7.32 (m, 2H), 7.34-7.47 (m, 2H), 7.47-7.49 (m, 1H), 8.27-8.28 (m, 1H);  $^{13}\text{C}$  NMR (100 MHz,  $\text{CDCl}_3$ ):  $\delta$  55.8, 57.0, 114.5, 114.7, 121.6, 123.5, 126.9, 127.0, 127.3, 127.6, 128.0, 128.3, 128.4, 128.7, 129.1, 130.1, 130.4, 135.9, 139.9, 140.7, 140.8, 141.0, 141.5, 141.9, 149.0, 151.9, 159.0; HRMS (ESI) Calcd for  $\text{C}_{31}\text{H}_{27}\text{N}_2\text{O}$   $[\text{M} + \text{H}]^+$  443.2123, found 443.2127.

## Formation of Isoindolinones via Self-Coupling of Aldimine (Scheme 2)

In a Schlenk tube were placed  $\text{CoBr}_2$  (6.6 mg, 0.030 mmol),  $\text{IPr}\cdot\text{HCl}$  (12.8 mg, 0.030 mmol), (*E*)-4-methoxy-*N*-(1-(*p*-tolyl)ethylidene)aniline (**2c**, 67.6 mg, 0.30 mmol), and THF (0.64 mL). To the mixture was added a THF solution of *t*BuCH<sub>2</sub>MgBr (0.63 M, 0.86 mL, 0.54 mmol) dropwise at 0 °C. After stirring for 30 min, another portion of **2c** (67.6 mg, 0.30 mmol) was added. The resulting mixture was stirred at 60 °C for 6 h, and then allowed to room temperature. The reaction was quenched by the addition of ether (1 mL) and H<sub>2</sub>O (1 mL), followed by dilution with ethyl acetate (3 mL). The resulting mixture was stirred under air for 96 h, and then extracted with ethyl acetate (3 x 10 mL). The combined organic layer was dried over  $\text{MgSO}_4$  and concentrated under reduced pressure. The crude product was purified by silica gel chromatography (eluent: hexane/EtOAc = 5/1 to 3/1 to 1/1) to afford 2-(4-methoxyphenyl)-5-methyl-3-(*p*-tolyl)isoindolin-1-one (**5**, 16.3 mg, 16 %) and 3-hydroxy-2-(4-methoxyphenyl)-5-methyl-3-(*p*-tolyl)isoindolin-1-one (**6**, 52.8 mg, 49%) both as off-white solids. Note that GC-MS analysis of the crude mixture obtained just after quenching gave a major peak at  $m/z = 327$ , indicating the formation of isoindole **4** (see Scheme 2). Attempted isolation of **4** by silica gel chromatography was not successful, resulting in the formation of **5**, **6**, and other intractable products.

**2-(4-Methoxyphenyl)-5-methyl-3-(*p*-tolyl)isoindolin-1-one (**5**):** m.p. 161.3-162.4 °C;  $R_f$  0.29 (hexane/EtOAc = 3/1); <sup>1</sup>H NMR (400 MHz,  $\text{CDCl}_3$ ):  $\delta$  2.28 (s, 3H), 2.38 (s, 3H), 3.75 (s, 3H), 5.91 (s, 1H), 6.82 (app.d,  $J = 8.8$  Hz, 2H), 7.01 (s, 1H), 7.04-7.09 (m, 4H), 7.28 (d,  $J = 8.0$  Hz, 1H), 7.42 (app.d,  $J = 8.8$  Hz, 2H), 7.83 (d,  $J = 8.0$  Hz, 1H); <sup>13</sup>C NMR (100 MHz,  $\text{CDCl}_3$ ):  $\delta$  21.3, 22.1, 55.5, 66.0, 114.3, 123.5, 123.9, 124.8, 127.3, 129.0, 129.7, 129.9, 130.9, 135.0, 138.3, 143.2, 146.4, 157.1, 168.1; HRMS (ESI) Calcd for  $\text{C}_{23}\text{H}_{22}\text{NO}_2$   $[\text{M} + \text{H}]^+$  344.1651, found 344.1650.

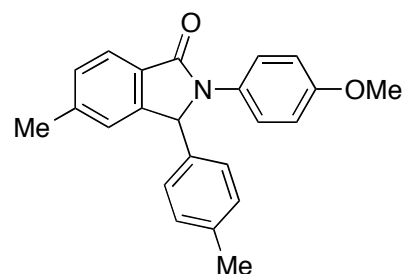

**3-Hydroxy-2-(4-methoxyphenyl)-5-methyl-3-(*p*-tolyl)isoindolin-1-one (**6**):** m.p. 208.8-210.1 °C;  $R_f$  0.16 (hexane/EtOAc = 3/1); <sup>1</sup>H NMR (400 MHz,  $\text{DMSO}-d_6$ ):  $\delta$  2.21 (s, 3H), 2.34 (s, 3H), 3.68 (s, 3H), 6.82 (app.d,  $J = 9.2$  Hz, 2H), 7.05-7.07 (m, 3H), 7.21 (app.d,  $J = 8.4$  Hz, 2H), 7.32-7.36 (m, 3H), 7.44 (s, 1H), 7.69 (d,  $J = 8.0$  Hz, 1H); <sup>13</sup>C NMR (100 MHz,  $\text{DMSO}-d_6$ ):  $\delta$  21.1, 21.8, 55.6, 92.4, 114.0, 123.3, 123.5, 126.5, 128.0, 129.4 (two signals overlapping), 129.7, 130.5, 137.4,

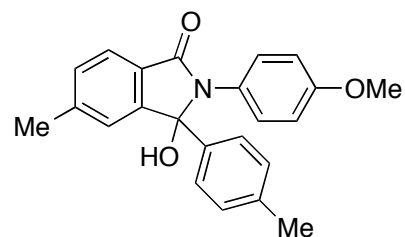

137.7, 143.8, 150.6, 157.6, 166.8; HRMS (ESI) Calcd for  $C_{23}H_{22}NO_3$   $[M + H]^+$  360.1600, found 360.1596.

### Synthesis of Indenones via Self-Coupling of Aldimines (Scheme 2 and Table 2)

**A Typical Procedure: 2-(4-Methoxyphenyl)-5-methyl-3-(*p*-tolyl)-1*H*-inden-1-one (7a).** In a Schlenk tube were placed  $CoBr_2$  (6.6 mg, 0.030 mmol),  $IPr \cdot HCl$  (12.8 mg, 0.030 mmol), (*E*)-4-methoxy-*N*-(1-(*p*-tolyl)ethylidene)aniline (**2c**, 67.6 mg, 0.30 mmol), and THF (0.71 mL). To the mixture was added a THF solution of *t*BuCH<sub>2</sub>MgBr (0.68 M, 0.79 mL, 0.54 mmol) dropwise at 0 °C. After stirring for 30 min, another portion of **2c** (67.6 mg, 0.30 mmol) was added. The resulting mixture was stirred at room temperature for 12 h, followed by the addition of H<sub>2</sub>O (0.3 mL) and 4-methoxybenzaldehyde (73  $\mu$ L, 0.60 mmol). After stirring for 1 h, aq. HCl (3 M, 1 mL) was added, and the resulting mixture was stirred at 60 °C for 12 h. The reaction was cooled to room temperature, and the aqueous layer was extracted with ethyl acetate (3 x 10 mL). The combined organic layer was dried over  $MgSO_4$  and concentrated under reduced pressure. The crude product was purified by silica gel chromatography (eluent: hexane/EtOAc = 50/1) to afford the title compound as a red solid (72.0 mg, 71% based on **2c**).

**7a:** m.p. 173.5-174.3 °C;  $R_f$  0.40 (hexane/EtOAc = 10/1);  $^1H$  NMR (400 MHz,  $CDCl_3$ ):  $\delta$  2.35 (s, 3H), 2.42 (s, 3H), 3.80 (s, 3H), 6.82 (app.d,  $J$  = 8.8 Hz, 2H), 6.94 (s, 1H), 7.05 (d,  $J$  = 7.2 Hz, 1H), 7.23-7.27 (m, 4H), 7.29 (app.d,  $J$  = 8.0 Hz, 2H), 7.46 (d,  $J$  = 7.2 Hz, 1H);  $^{13}C$  NMR (100 MHz,  $CDCl_3$ ):  $\delta$  21.7, 22.3, 55.3, 113.8, 122.4, 123.0, 123.6, 128.6 (two signals overlapping), 128.7, 129.7, 130.3, 131.4, 132.1, 139.3, 144.4, 146.2, 153.8, 159.2, 196.9; HRMS (ESI) Calcd for  $C_{24}H_{21}O_2$   $[M + H]^+$  341.1542, found 341.1540.

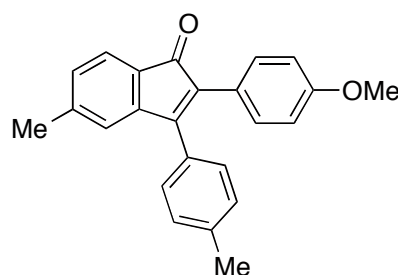

**2-(4-Methoxyphenyl)-3-phenyl-1*H*-inden-1-one (7b):** The typical procedure was applied to (*E*)-*N*-benzylidene-4-methoxyaniline (**2b**, 126.8 mg, 0.60 mmol) and 4-methoxybenzaldehyde (73  $\mu$ L, 0.60 mmol). Silica gel chromatography (eluent: hexane/EtOAc = 50/1) of the crude product afforded the title compound as a light red solid (64.0 mg, 68%).

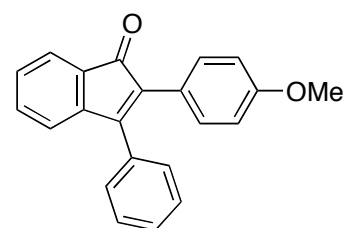

m.p. 116.8-117.5 °C (lit. 118-119 °C);<sup>2</sup>  $R_f$  0.47 (hexane/EtOAc = 8/1);  $^1H$  NMR (400 MHz,

CDCl<sub>3</sub>):  $\delta$  3.79 (s, 3H), 6.81 (app.d,  $J$  = 8.8 Hz, 2H), 7.12 (d,  $J$  = 7.2 Hz, 1H), 7.24-7.28 (m, 3H), 7.36 (t,  $J$  = 7.2 Hz, 1H), 7.39-7.44 (m, 5H), 7.57 (d,  $J$  = 6.8 Hz, 1H); <sup>13</sup>C NMR (100 MHz, CDCl<sub>3</sub>):  $\delta$  55.4, 113.8, 121.1, 123.0, 123.3, 128.7, 128.8, 129.0, 129.3, 130.9, 131.5, 132.1, 133.2, 133.6, 145.7, 154.0, 159.4, 197.2; HRMS (ESI) Calcd for C<sub>22</sub>H<sub>17</sub>O [M + H]<sup>+</sup> 313.1229, found 313.1226.

**4-(1-Oxo-3-phenyl-1H-inden-2-yl)benzonitrile (7c):** The typical procedure was applied to (*E*)-*N*-benzylidene-4-methoxyaniline (**2b**, 126.8 mg, 0.60 mmol) and 4-cyanobenzaldehyde (78.7 mg, 0.60 mmol). Silica gel chromatography (eluent: hexane/EtOAc = 25/1) of the crude product afforded the title compound as a red solid (63.6 mg, 69%).

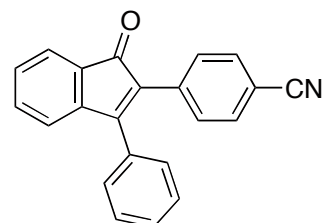

m.p. 139.1-139.9 °C (lit. 142-144 °C);<sup>3</sup>  $R_f$  0.27 (hexane/EtOAc = 10/1); <sup>1</sup>H NMR (400 MHz, CDCl<sub>3</sub>):  $\delta$  7.18 (d,  $J$  = 7.2 Hz, 1H), 7.34-7.37 (m, 4H), 7.38-7.41 (m, 2H), 7.43-7.47 (m, 3H), 7.53 (app.d,  $J$  = 8.4 Hz, 2H), 7.61 (d,  $J$  = 7.2 Hz, 1H); <sup>13</sup>C NMR (100 MHz, CDCl<sub>3</sub>):  $\delta$  111.2, 119.0, 122.1, 123.5, 128.5, 129.3, 129.9, 130.2, 130.5 (two signals overlapping), 130.7, 132.0, 132.1, 134.0, 135.9, 144.7, 158.0, 195.6; HRMS (ESI) Calcd for C<sub>22</sub>H<sub>14</sub>NO [M + H]<sup>+</sup> 308.1075, found 308.1078.

**3-Phenyl-2-(4-(trifluoromethyl)phenyl)-1H-inden-1-one (7d):** The typical procedure was applied to (*E*)-*N*-benzylidene-4-methoxyaniline (**2b**, 126.8 mg, 0.60 mmol) and 4-trifluoromethylbenzaldehyde (82  $\mu$ L, 0.60 mmol). Silica gel chromatography (eluent: hexane/EtOAc = 100/1) of the crude product afforded the title compound as a light red oil (66.3 mg, 63%).

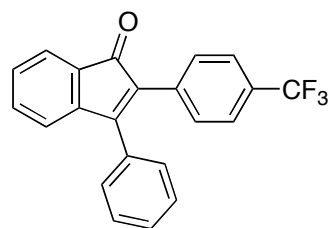

$R_f$  0.53 (hexane/EtOAc = 10/1); <sup>1</sup>H NMR (400 MHz, CDCl<sub>3</sub>):  $\delta$  7.18 (d,  $J$  = 7.2 Hz, 1H), 7.31-7.35 (m, 1H), 7.36-7.42 (m, 5H), 7.43-7.46 (m, 3H), 7.52 (d,  $J$  = 8.4 Hz, 2H), 7.61 (d,  $J$  = 6.8 Hz, 1H); <sup>13</sup>C NMR (100 MHz, CDCl<sub>3</sub>):  $\delta$  121.9, 123.5, 124.4 (q, <sup>1</sup> $J_{C-H}$  = 248 Hz), 125.2 (q, <sup>3</sup> $J_{C-H}$  = 4.0 Hz), 128.4 (q, <sup>2</sup> $J_{C-H}$  = 30 Hz), 128.6, 129.3, 129.7, 130.0, 130.2, 130.4, 130.8, 132.4, 133.9, 134.7, 145.0, 157.3, 196.0; HRMS (ESI) Calcd for C<sub>22</sub>H<sub>14</sub>F<sub>3</sub>O [M + H]<sup>+</sup> 351.0997, found 351.0999.

**2-(2,6-Difluorophenyl)-3-phenyl-1*H*-inden-1-one (7e):** The typical procedure was applied to (*E*)-*N*-benzylidene-4-methoxyaniline (**2b**, 126.8 mg, 0.60 mmol) and 2,6-difluorobenzaldehyde (65  $\mu$ L, 0.60 mmol). Silica gel chromatography (eluent: hexane/EtOAc = 50/1) of the crude product afforded the title compound as a yellow solid (76.6 mg, 80%).

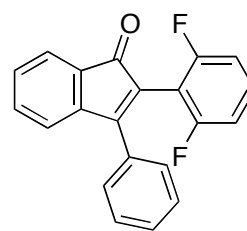

m.p. 133.3-134.5 °C;  $R_f$  0.50 (hexane/EtOAc = 8/1);  $^1\text{H}$  NMR (400 MHz,  $\text{CDCl}_3$ ):  $\delta$  6.85-6.89 (m, 2H), 7.25-7.30 (m, 2H), 7.32-7.36 (m, 1H), 7.40-7.44 (m, 6H), 7.63 (d,  $J$  = 6.8 Hz, 1H);  $^{13}\text{C}$  NMR (100 MHz,  $\text{CDCl}_3$ ):  $\delta$  109.2 (t,  $^2J_{\text{C-F}}$  = 10 Hz), 111.7 (dd,  $^2J_{\text{C-F}}$  = 19 Hz,  $^4J_{\text{C-F}}$  = 6 Hz), 122.0, 123.5, 127.8, 128.9, 129.6, 130.1, 130.4 (t,  $^3J_{\text{C-F}}$  = 10 Hz), 131.5, 132.6, 133.5, 144.8, 144.8, 160.1, 161.0 (dd,  $^1J_{\text{C-F}}$  = 249 Hz,  $^3J_{\text{C-F}}$  = 7 Hz), 194.4; HRMS (ESI) Calcd for  $\text{C}_{21}\text{H}_{13}\text{F}_2\text{O}$   $[\text{M} + \text{H}]^+$  319.0934, found 319.0933.

**2-(4-Methoxyphenyl)-3-phenyl-1*H*-inden-1-one (7f):** The typical procedure was applied to (*E*)-*N*-benzylidene-4-methoxyaniline (**2b**, 126.8 mg, 0.60 mmol) and 3,5-diiodo-4-hydroxybenzaldehyde (224.3 mg, 0.60 mmol). Silica gel chromatography (eluent: hexane/EtOAc = 3/1) of the crude product afforded the title compound as a dark red solid (91.5 mg, 55%).

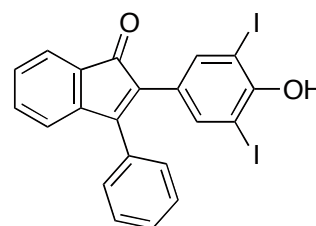

m.p. 177.2-178.4 °C;  $R_f$  0.55 (hexane/EtOAc = 3/1);  $^1\text{H}$  NMR (400 MHz,  $\text{CDCl}_3$ ):  $\delta$  5.82 (brs, 1H), 7.13 (d,  $J$  = 4.8 Hz, 1H), 7.30 (d,  $J$  = 7.2 Hz, 1H), 7.36-7.39 (m, 3H), 7.46-7.47 (m, 3H), 7.57 (d,  $J$  = 6.8 Hz, 1H), 7.59 (s, 2H);  $^{13}\text{C}$  NMR (100 MHz,  $\text{CDCl}_3$ ):  $\delta$  81.9, 121.7, 123.3, 127.2, 128.5, 128.8, 129.2, 129.5, 130.0, 130.6, 132.2, 133.9, 140.7, 145.0, 153.2, 156.0, 196.1; HRMS (ESI) Calcd for  $\text{C}_{21}\text{H}_{13}\text{I}_2\text{O}_2$   $[\text{M} + \text{H}]^+$  550.9005, found 550.9000.

**3-Phenyl-2-(pyridin-4-yl)-1*H*-inden-1-one (7g):** The typical procedure was applied to (*E*)-*N*-benzylidene-4-methoxyaniline (**2b**, 126.8 mg, 0.60 mmol) and 4-pyridinecarboxaldehyde (56  $\mu$ L, 0.60 mmol). Silica gel chromatography (eluent: hexane/EtOAc = 5/1) of the crude product afforded the title compound as an orange solid (64.9 mg, 76%).

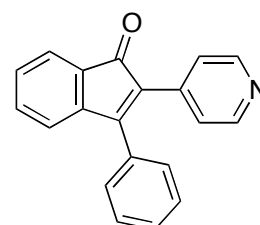

m.p. 131.3-132.5 °C;  $R_f$  0.20 (hexane/EtOAc = 3/1);  $^1\text{H}$  NMR (400 MHz,  $\text{CDCl}_3$ ):  $\delta$  7.17-7.18 (m, 3H), 7.34-7.47 (m, 7H), 7.61 (dd,  $J$  = 7.2, 0.8 Hz, 1H), 8.49 (d,  $J$  = 2.4 Hz, 2H);  $^{13}\text{C}$  NMR (100 MHz,  $\text{CDCl}_3$ ):  $\delta$  122.2, 123.5, 124.4, 128.4, 129.3, 129.7, 130.0, 130.2, 130.8, 132.0, 133.9, 138.9, 144.7, 149.8, 158.7, 195.4; HRMS (ESI) Calcd for  $\text{C}_{20}\text{H}_{14}\text{NO}$   $[\text{M} + \text{H}]^+$  284.1075,

found 284.1078.

**2-(Furan-2-yl)-3-phenyl-1*H*-inden-1-one (7h):** The typical procedure was applied to (*E*)-*N*-benzylidene-4-methoxyaniline (**2b**, 126.8 mg, 0.60 mmol) and furfural (50  $\mu$ L, 0.60 mmol). Silica gel chromatography (eluent: hexane/EtOAc = 50/1) of the crude product afforded the title compound as a dark red solid (27.3 mg, 33%).

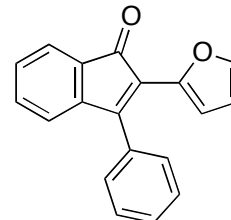

m.p. 92.3-93.7  $^{\circ}$ C;  $R_f$  0.55 (hexane/EtOAc = 8/1);  $^1\text{H}$  NMR (400 MHz,  $\text{CDCl}_3$ ):  $\delta$  6.43-6.44 (m, 1H), 7.02 (d,  $J$  = 7.2 Hz, 1H), 7.13 (d,  $J$  = 3.2 Hz, 1H), 7.22 (t,  $J$  = 7.2 Hz, 1H), 7.26-7.27 (m, 1H), 7.32 (td,  $J$  = 7.6, 0.8 Hz, 1H), 7.47-7.50 (m, 6H);  $^{13}\text{C}$  NMR (100 MHz,  $\text{CDCl}_3$ ):  $\delta$  111.7, 112.7, 121.7, 122.1, 123.2, 128.4, 128.8, 128.9, 129.4, 131.0, 133.2, 134.0, 143.1, 146.6, 147.3, 150.9, 195.2; HRMS (ESI) Calcd for  $\text{C}_{19}\text{H}_{13}\text{O}_2$   $[\text{M} + \text{H}]^+$  273.0916, found 273.0916.

**Ethyl 1-oxo-3-phenyl-1*H*-indene-2-carboxylate (7i):** The typical procedure was applied to (*E*)-*N*-benzylidene-4-methoxyaniline (**2b**, 126.8 mg, 0.60 mmol) and ethyl glyoxalate (50% solution in toluene, 120  $\mu$ L, 0.60 mmol). Silica gel chromatography (eluent: hexane/EtOAc = 30/1-10/1) of the crude product afforded the title compound as a yellow solid (34.0 mg, 41%).

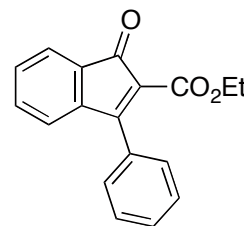

m.p. 84.0-84.8  $^{\circ}$ C (lit. 87-88  $^{\circ}$ C);<sup>4</sup>  $R_f$  0.20 (hexane/EtOAc = 10/1);  $^1\text{H}$  NMR (400 MHz,  $\text{CDCl}_3$ ):  $\delta$  1.16 (t,  $J$  = 7.2 Hz, 3H), 4.20 (q,  $J$  = 6.8 Hz, 2H), 7.19-7.21 (m, 1H), 7.39-7.42 (m, 2H), 7.50-7.54 (m, 5H), 7.59-7.61 (m, 1H);  $^{13}\text{C}$  NMR (100 MHz,  $\text{CDCl}_3$ ):  $\delta$  14.1, 61.1, 123.6, 124.6, 128.3, 128.6, 130.6 (two signals overlapping) 130.7, 131.2, 131.7, 133.7, 143.3, 163.2, 165.1, 192.3; HRMS (ESI) Calcd for  $\text{C}_{18}\text{H}_{15}\text{O}_3$   $[\text{M} + \text{H}]^+$  279.1021, found 279.1019.

**5-Methoxy-2,3-bis(4-methoxyphenyl)-1*H*-inden-1-one (7j):** The typical procedure was applied to (*E*)-4-methoxy-*N*-(4-methoxybenzylidene)aniline (**2d**, 144.8 mg, 0.60 mmol) and 4-methoxybenzaldehyde (73  $\mu$ L, 0.60 mmol). Silica gel chromatography (eluent: hexane/EtOAc = 15/1 – 5/1) of the crude product afforded the title compound as an orange solid (94.9 mg, 81%).

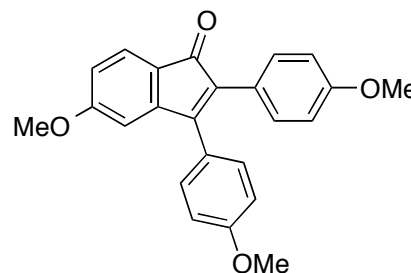

m.p. 169.4-170.1  $^{\circ}$ C (lit. 173-175  $^{\circ}$ C);<sup>5</sup>  $R_f$  0.21 (hexane/EtOAc = 8/1);  $^1\text{H}$  NMR (400 MHz,  $\text{CDCl}_3$ ):  $\delta$  3.78 (s, 3H), 3.81 (s, 3H), 3.83 (s, 3H),

6.63 (dd,  $J = 8.0, 2.0$  Hz, 1H), 6.70 (d,  $J = 2.0$  Hz, 1H), 6.81 (app.d,  $J = 8.8$  Hz, 2H), 6.92 (app.d,  $J = 8.8$  Hz, 2H), 7.24 (d,  $J = 9.2$  Hz, 2H), 7.32 (d,  $J = 8.8$  Hz, 2H), 7.50 (d,  $J = 8.0$  Hz, 1H);  $^{13}\text{C}$  NMR (100 MHz,  $\text{CDCl}_3$ ):  $\delta$  55.3, 55.4, 55.8, 110.0, 110.3, 113.7, 114.3, 123.7, 123.8, 124.7, 125.2, 130.3, 131.4, 132.7, 148.2, 151.7, 159.2, 160.3, 164.4, 195.7; HRMS (ESI) Calcd for  $\text{C}_{24}\text{H}_{21}\text{O}_4$   $[\text{M} + \text{H}]^+$  373.1440, found 373.1439. The  $^1\text{H}$  and  $^{13}\text{C}$  NMR spectra showed good agreement with the literature data.<sup>6</sup>

**5-Fluoro-3-(4-fluorophenyl)-2-(4-methoxyphenyl)-1*H*-inden-1-one (7k):** The typical procedure was applied to (*E*)-*N*-(4-fluorobenzylidene)-4-methoxyaniline (**2e**, 137.6 mg, 0.60 mmol) and 4-methoxybenzaldehyde (73  $\mu\text{L}$ , 0.60 mmol). Silica gel chromatography (eluent: hexane/EtOAc = 50/1) of the crude product afforded the title compound as a light red solid (59.6 mg, 57%).

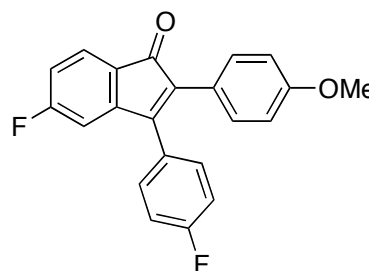

m.p. 180.4–181.3 °C;  $R_f$  0.38 (hexane/EtOAc = 8/1);  $^1\text{H}$  NMR (400 MHz,  $\text{CDCl}_3$ ):  $\delta$  3.79 (s, 3H), 6.78–6.83 (m, 3H), 6.87–6.92 (m, 1H), 7.10–7.15 (m, 2H), 7.20–7.22 (m, 2H), 7.34–7.38 (m, 2H), 7.54 (dd,  $J = 8.0, 5.2$  Hz, 1H);  $^{13}\text{C}$  NMR (100 MHz,  $\text{CDCl}_3$ ):  $\delta$  55.4, 109.8 (d,  $^2J_{\text{C-F}} = 26$  Hz), 114.0, 114.4 (d,  $^2J_{\text{C-F}} = 23$  Hz), 116.4 (d,  $^2J_{\text{C-F}} = 21$  Hz), 122.7, 125.0 (d,  $^3J_{\text{C-F}} = 9$  Hz), 126.6 (d,  $^4J_{\text{C-F}} = 3$  Hz), 128.7 (d,  $^4J_{\text{C-F}} = 3$  Hz), 130.6 (d,  $^3J_{\text{C-F}} = 9$  Hz), 131.5, 133.6, 148.9 (d,  $^3J_{\text{C-F}} = 9$  Hz), 150.6, 159.7, 162.3 (d,  $^1J_{\text{C-F}} = 249$  Hz), 166.7 (d,  $^1J_{\text{C-F}} = 253$  Hz), 195.2; HRMS (ESI) Calcd for  $\text{C}_{22}\text{H}_{15}\text{F}_2\text{O}_2$   $[\text{M} + \text{H}]^+$  349.1040, found 349.1035.

**2-(4-Methoxyphenyl)-6-methyl-3-(*m*-tolyl)-1*H*-inden-1-one (7l):** The typical procedure was applied to (*E*)-4-methoxy-*N*-(3-methylbenzylidene)aniline (**2f**, 135.2 mg, 0.60 mmol) and 4-methoxybenzaldehyde (73  $\mu\text{L}$ , 0.60 mmol). Silica gel chromatography (eluent: hexane/EtOAc = 50/1) of the crude product afforded a mixture of the title compound and its minor regioisomer (2-(4-methoxyphenyl)-4-methyl-3-(*m*-tolyl)-1*H*-inden-1-one) as a dark red solid (67.1 mg, 66%). The ratio of the regioisomers was determined to be 2.7:1 by  $^1\text{H}$  NMR analysis.

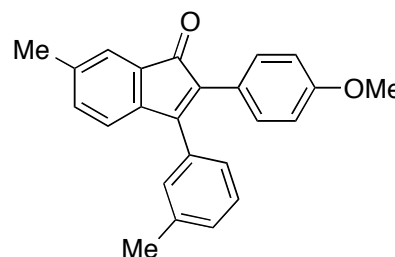

$R_f$  0.48 (hexane/EtOAc = 8/1);  $^1\text{H}$  NMR (400 MHz,  $\text{CDCl}_3$ , major isomer):  $\delta$  2.36 (s, 3H), 2.37 (s, 3H), 3.79 (s, 3H), 6.81 (d,  $J = 8.8$  Hz, 2H), 6.99 (d,  $J = 7.6$  Hz, 1H), 7.10–7.16 (m, 2H), 7.17–7.26 (m, 3H), 7.28 (s, 1H), 7.32 (t,  $J = 7.2$  Hz, 1H), 7.38 (s, 1H);  $^{13}\text{C}$  NMR (100 MHz,

CDCl<sub>3</sub>):  $\delta$  21.5, 21.6, 55.3, 113.7 (two signals overlapping), 121.0, 123.5, 124.1, 125.8, 128.6, 129.0, 130.0, 131.2, 131.28, 131.33, 133.5, 138.6, 139.0, 143.0, 154.5, 159.2, 197.6; HRMS (ESI) Calcd for C<sub>24</sub>H<sub>21</sub>O<sub>2</sub> [M + H]<sup>+</sup> 341.1542, found 341.1537.

**2-(4-Methoxyphenyl)-7-methyl-3-(*o*-tolyl)-1*H*-inden-1-one (7m):** The typical procedure was applied to (*E*)-4-methoxy-*N*-(2-methylbenzylidene)aniline (**2g**, 135.2 mg, 0.60 mmol) and 4-methoxybenzaldehyde (73  $\mu$ L, 0.60 mmol). Silica gel chromatography (eluent: hexane/EtOAc = 100/1) of the crude product afforded the title compound as a light red oil (21.7 mg, 21%).

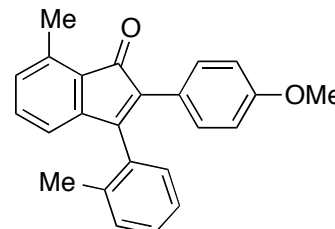

*R<sub>f</sub>* 0.45 (hexane/EtOAc = 10/1); <sup>1</sup>H NMR (400 MHz, CDCl<sub>3</sub>):  $\delta$  2.09 (s, 3H), 2.64 (s, 3H), 3.78 (s, 3H), 6.62 (d, *J* = 7.2 Hz, 1H), 6.78 (d, *J* = 8.8 Hz, 2H), 7.03 (d, *J* = 7.6 Hz, 1H), 7.19 (t, *J* = 7.2 Hz, 1H), 7.26-7.36 (m, 6H); <sup>13</sup>C NMR (100 MHz, CDCl<sub>3</sub>):  $\delta$  17.5, 20.1, 55.3, 113.8, 119.1, 124.1, 126.4, 126.9, 128.4, 128.8, 130.6, 131.0, 132.06, 132.14, 133.1, 133.4, 136.0, 137.8, 146.8, 153.4, 159.3, 198.5; HRMS (ESI) Calcd for C<sub>24</sub>H<sub>21</sub>O<sub>2</sub> [M + H]<sup>+</sup> 341.1542, found 341.1537.

**5-Methoxy-3-(4-methoxyphenyl)-2-(naphthalen-2-yl)-1*H*-inden-1-one (7n):** The typical procedure was applied to (*E*)-4-methoxy-*N*-(4-methoxybenzylidene)aniline (**2d**, 144.8 mg, 0.60 mmol) and 2-naphthaldehyde (93.7 mg, 0.60 mmol). Silica gel chromatography (eluent: hexane/EtOAc = 10/1 – 5/1) of the crude product afforded the title compound as a red solid (84.2 mg, 72%).

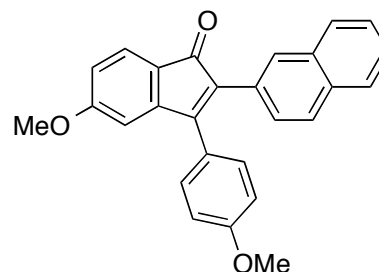

m.p. 59.6-60.8 °C; *R<sub>f</sub>* 0.18 (hexane/EtOAc = 10/1); <sup>1</sup>H NMR (400 MHz, CDCl<sub>3</sub>):  $\delta$  3.83 (s, 3H), 3.85 (s, 3H), 6.69 (dd, *J* = 8.0, 2.0 Hz, 1H), 6.80 (d, *J* = 2.0 Hz, 1H), 6.90 (app.d, *J* = 8.8 Hz, 2H), 7.23 (dd, *J* = 8.4, 2.0 Hz, 1H), 7.35 (app.d, *J* = 8.8 Hz, 2H), 7.44-7.47 (m, 2H), 7.57 (d, *J* = 8.0 Hz, 1H), 7.67 (d, *J* = 8.4 Hz, 1H), 7.76-7.78 (m, 1H), 7.80-7.82 (m, 1H), 7.97 (s, 1H); <sup>13</sup>C NMR (100 MHz, CDCl<sub>3</sub>):  $\delta$  55.4, 55.9, 110.4, 110.7, 114.4, 124.0, 124.9, 125.0, 126.1, 126.4, 127.5, 127.6, 127.7, 128.6, 128.9, 129.9, 130.5, 132.8, 133.0, 133.4, 148.0, 153.4, 160.6, 164.5, 195.3; HRMS (ESI) Calcd for C<sub>27</sub>H<sub>21</sub>O<sub>3</sub> [M + H]<sup>+</sup> 393.1491, found 393.1496.

**Methyl 4-(5-methoxy-3-(4-methoxyphenyl)-1-oxo-1*H*-inden-2-yl)benzoate (7o):** The typical procedure was applied to (*E*)-4-methoxy-*N*-(4-methoxybenzylidene)aniline (**2d**, 144.8 mg, 0.60 mmol) and methyl 4-formylbenzoate (98.5 mg, 0.60 mmol). Silica gel chromatography (eluent: hexane/EtOAc = 10/1 – 3/1) of the crude product afforded the title compound as an orange solid (88.7 mg, 74%).

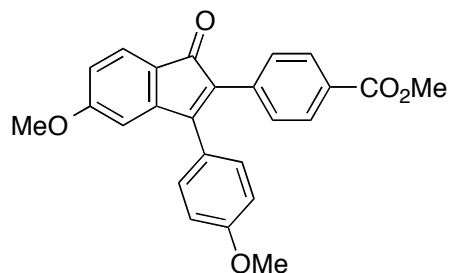

m.p. 114.3-115.6 °C;  $R_f$  0.30 (hexane/EtOAc = 3/1);  $^1\text{H}$  NMR (400 MHz,  $\text{CDCl}_3$ ):  $\delta$  3.825 (s, 3H), 3.833 (s, 3H), 3.88 (s, 3H), 6.68 (dd,  $J$  = 8.0, 2.4 Hz, 1H), 6.75 (d,  $J$  = 2.0 Hz, 1H), 6.91 (app.d,  $J$  = 8.8 Hz, 2H), 7.27 (app.d,  $J$  = 8.8 Hz, 2H), 7.35 (app.d,  $J$  = 8.8 Hz, 2H), 7.53 (d,  $J$  = 8.0 Hz, 1H), 7.92 (app.d,  $J$  = 8.4 Hz, 2H);  $^{13}\text{C}$  NMR (100 MHz,  $\text{CDCl}_3$ ):  $\delta$  52.2, 55.5, 55.9, 110.8, 111.0, 114.5, 123.8, 124.4, 125.0, 129.0, 129.4, 130.1, 130.3, 132.1, 136.3, 147.5, 154.8, 160.8, 164.5, 167.1, 194.6; HRMS (ESI) Calcd for  $\text{C}_{25}\text{H}_{21}\text{O}_5$   $[\text{M} + \text{H}]^+$  401.1389, found 401.1386.

**2,2'-(1,3-Phenylene)bis(5-methyl-3-(*p*-tolyl)-1*H*-inden-1-one) (7p):** In a Schlenk tube were placed  $\text{CoBr}_2$  (13.2 mg, 0.060 mmol),  $\text{IPr}\cdot\text{HCl}$  (23.6 mg, 0.060 mmol), (*E*)-4-methoxy-*N*-(1-(*p*-tolyl)ethylidene)aniline (**2c**, 135.2 mg, 0.60 mmol), and THF (1.42 mL). To the mixture was added a THF solution of  $(\text{CH}_3)_3\text{CCH}_2\text{MgBr}$  (0.68 M, 1.58 mL, 1.08 mmol) dropwise at 0 °C. After stirring for 30 min, another portion of **2c** (135.2 mg, 0.60 mmol) was added. The resulting mixture was stirred at room temperature for 12 h, followed by the addition of  $\text{H}_2\text{O}$  (0.6 mL) and isophthalaldehyde (26.8 mg, 0.20 mmol). After stirring for 1 h, aq. HCl (3 M, 2 mL) was added, and the resulting mixture was stirred at 100 °C for 12 h. The reaction was cooled to room temperature, and the aqueous layer was extracted with ethyl acetate (3 x 10 mL). The combined organic layer was dried over  $\text{MgSO}_4$  and concentrated under reduced pressure. The crude product was purified by silica gel chromatography (eluent: hexane/EtOAc = 3/1) to afford the title compound as a dark red solid (75.3 mg, 69% based on isophthalaldehyde).

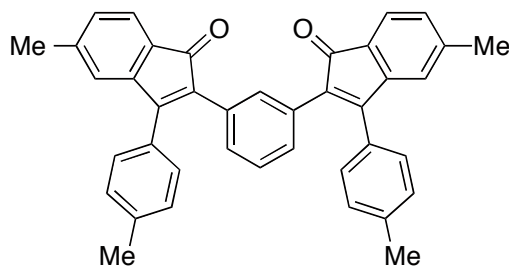

m.p. 193.4-194.5 °C;  $R_f$  0.15 (hexane/EtOAc = 10/1);  $^1\text{H}$  NMR (400 MHz,  $\text{CDCl}_3$ ):  $\delta$  2.34 (s, 6H), 2.40 (s, 6H), 7.00 (s, 2H), 7.06 (d,  $J$  = 7.2 Hz, 2H), 7.09-7.12 (m, 3H), 7.21-7.26 (m, 8H), 7.32 (s, 1H), 7.44 (d,  $J$  = 7.2 Hz, 2H);  $^{13}\text{C}$  NMR (100 MHz,  $\text{CDCl}_3$ ):  $\delta$  21.7, 22.3, 122.7, 123.1,

127.9, 128.7 (two signals overlapping), 129.0, 129.4, 129.6, 129.9, 131.2, 131.8, 132.6, 139.5, 144.3, 145.9, 155.3, 196.2; HRMS (ESI) Calcd for  $C_{40}H_{31}O_2$   $[M + H]^+$  543.2324, found 543.2325.

**1-(2-Benzoylphenyl)-3,3-dimethylbutan-1-one (7q):** The typical procedure was applied to (*E*)-*N*-benzylidene-4-methoxyaniline (**2b**, 63.4 mg, 0.30 mmol) and pivalaldehyde (65  $\mu$ L, 0.6 mmol). Silica gel chromatography (eluent: hexane/EtOAc = 20/1–5/1) of the crude product afforded the title compound as a red oil (39.0 mg, 46%).

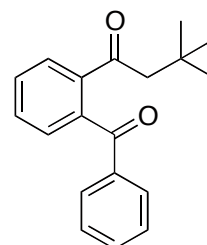

$R_f$  0.20 (hexane/EtOAc = 10/1);  $^1H$  NMR (400 MHz,  $CDCl_3$ ):  $\delta$  0.94 (s, 9H), 2.75 (s, 2H), 7.39-7.42 (m, 3H), 7.50-7.54 (m, 1H), 7.55-7.59 (m, 2H), 7.72-7.74 (m, 2H), 7.82-7.84 (m, 1H);  $^{13}C$  NMR (100 MHz,  $CDCl_3$ ):  $\delta$  29.8, 31.7, 51.5, 128.5, 128.7, 129.0, 129.6, 129.8, 131.7, 133.0, 137.6, 139.9, 141.0, 198.0, 201.3; HRMS (ESI) Calcd for  $C_{19}H_{21}O_2$   $[M + H]^+$  281.1542, found 281.1545.

## Proposed Mechanism for the Formation of Indenone

Below is shown a possible mechanism for the formation of indene, which is similar to that proposed for the reaction of isobenzofuran and benzaldehyde by Kuninobu and Takai.<sup>6</sup> Formation of the diketone product **7q** from pivalaldehyde can be explained by hydrolysis of the intermediate **A**.

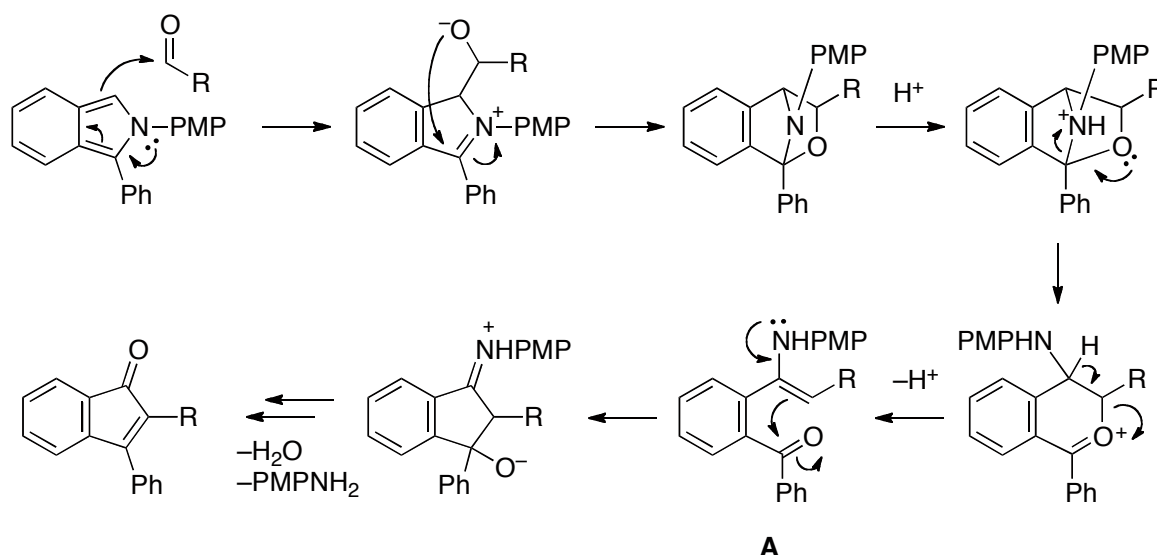

**Scheme S1.** Proposed mechanism for the condensation of isoindole and aldehyde

- (1) (a) Mongin, F.; Mojovic, L.; Guillaumet, B.; Trécourt, F.; Quéguiner, G. *J. Org. Chem.* **2002**, 67, 8991. (b) Rebstock, A.-S.; Mongin, F.; Trécourt, F.; Quéguiner, G. *Tetrahedron* **2003**, 59, 4973.
- (2) Bergman, E. D. *J. Org. Chem.* **1956**, 21, 461.
- (3) Koelsch, C. F. *J. Am. Chem. Soc.* **1936**, 58, 1331.
- (4) Yost, W. L.; Burger, A. *J. Org. Chem.* **1950**, 15, 1113.
- (5) Neunhoeffer, v. H.; Vötter, H.-D.; Gais-Mutterer, M. *Tetrahedron Lett.* **1973**, 14, 219.
- (6) Kuninobu, Y.; Matsuki, T.; Takai, K. *Org. Lett.* **2010**, 12, 2948.

# NMR Spectra

3a

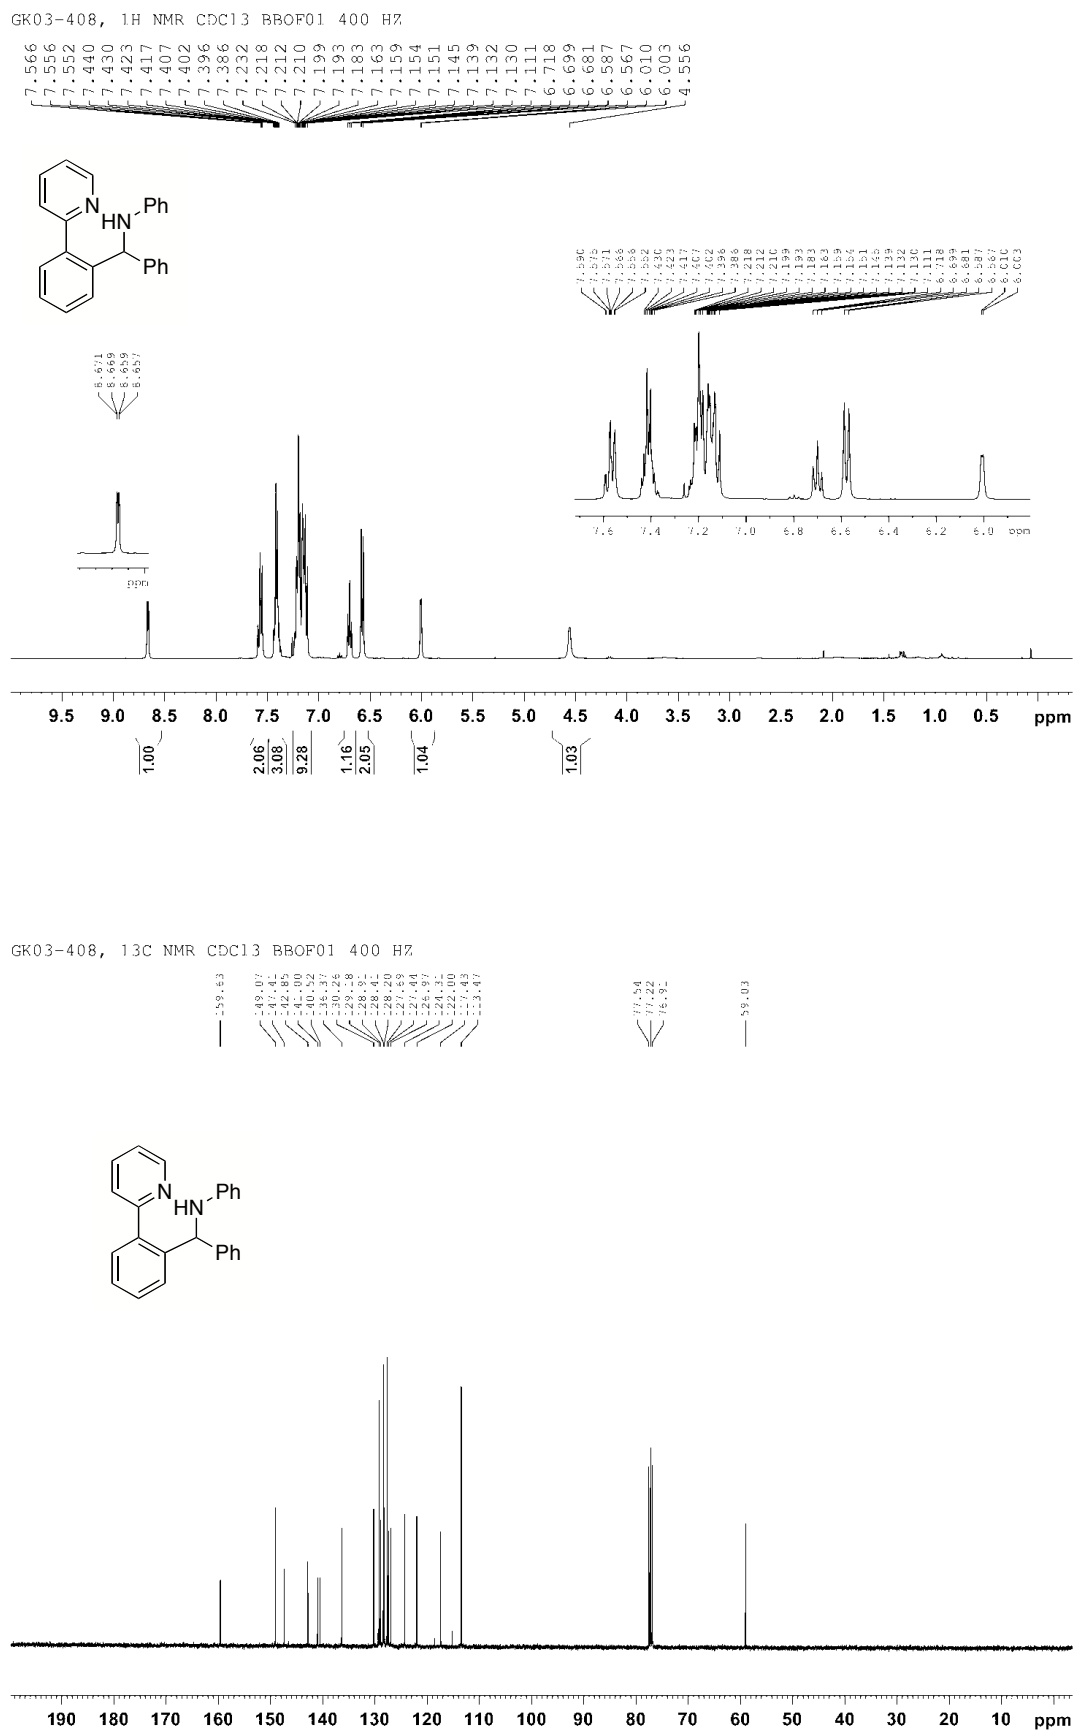

3b

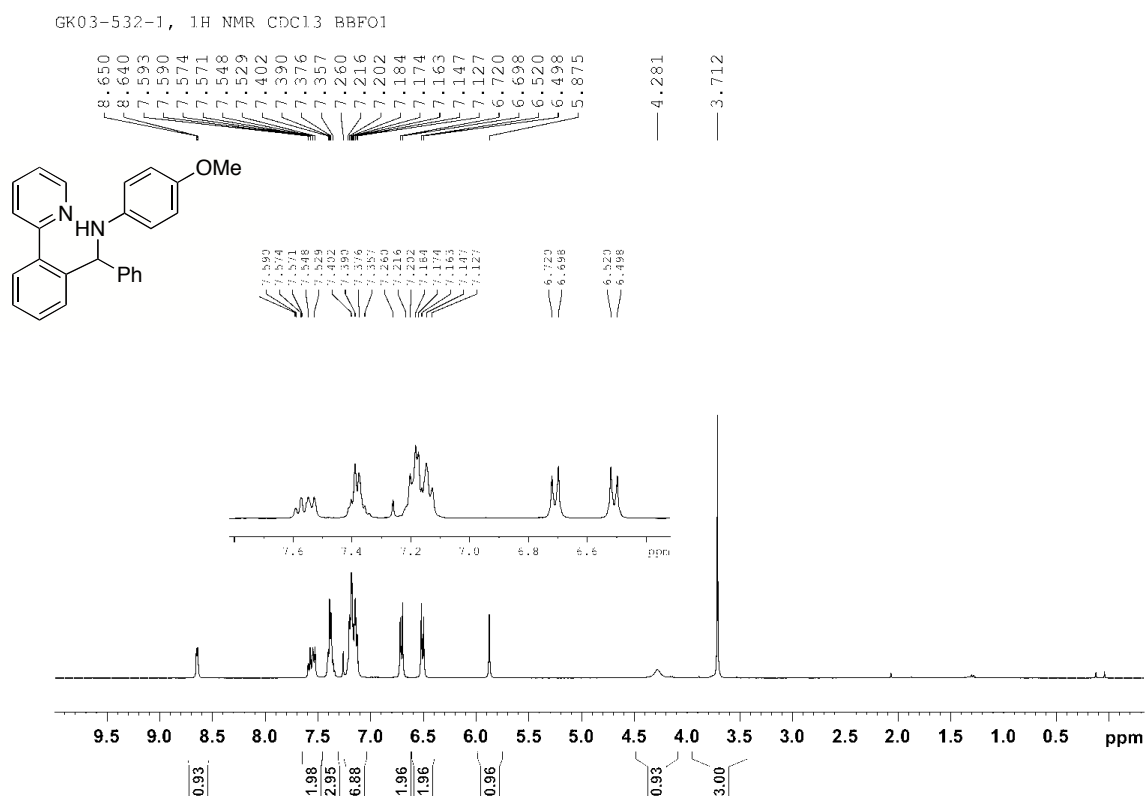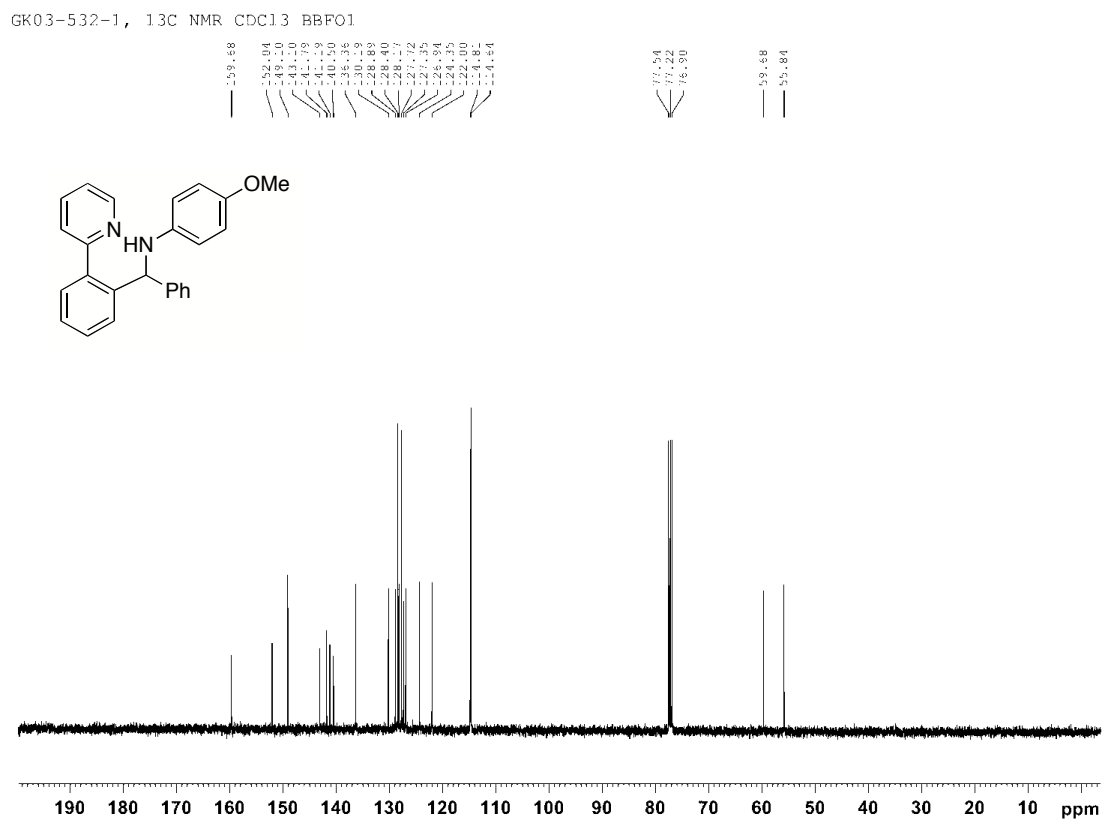

3c

GK03-536, <sup>1</sup>H NMR CDC13 BBFO1 400MHz

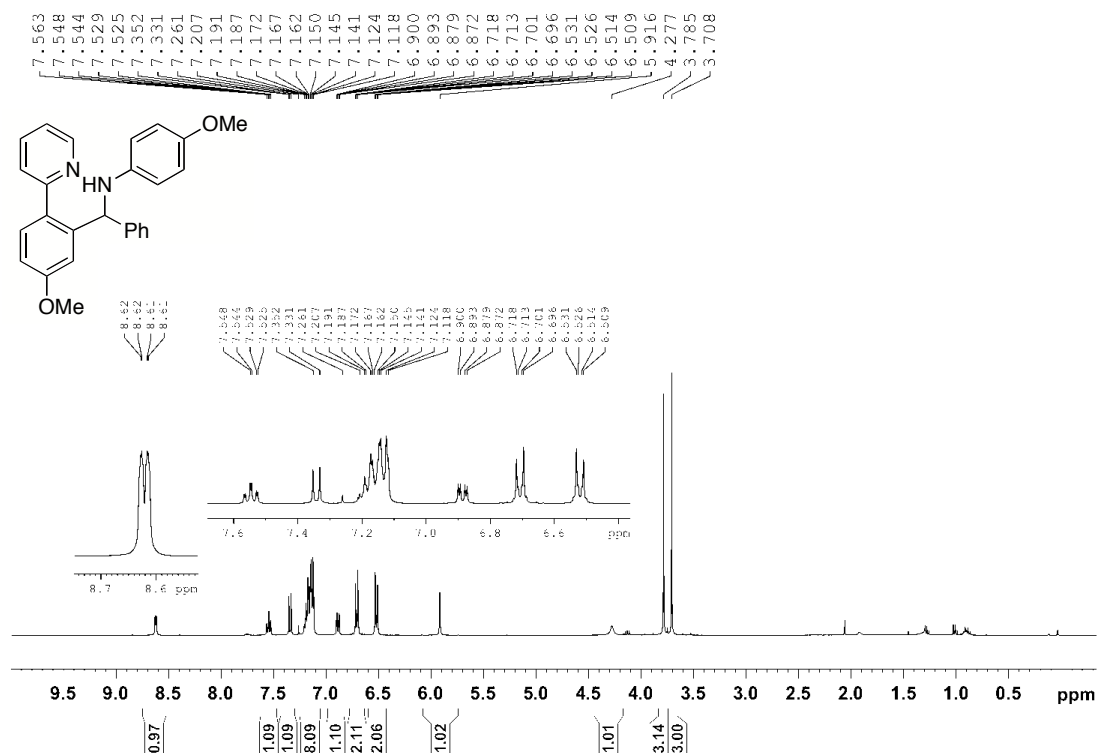

GK03-536, <sup>13</sup>C NMR CDC13 BBFO1 400MHz

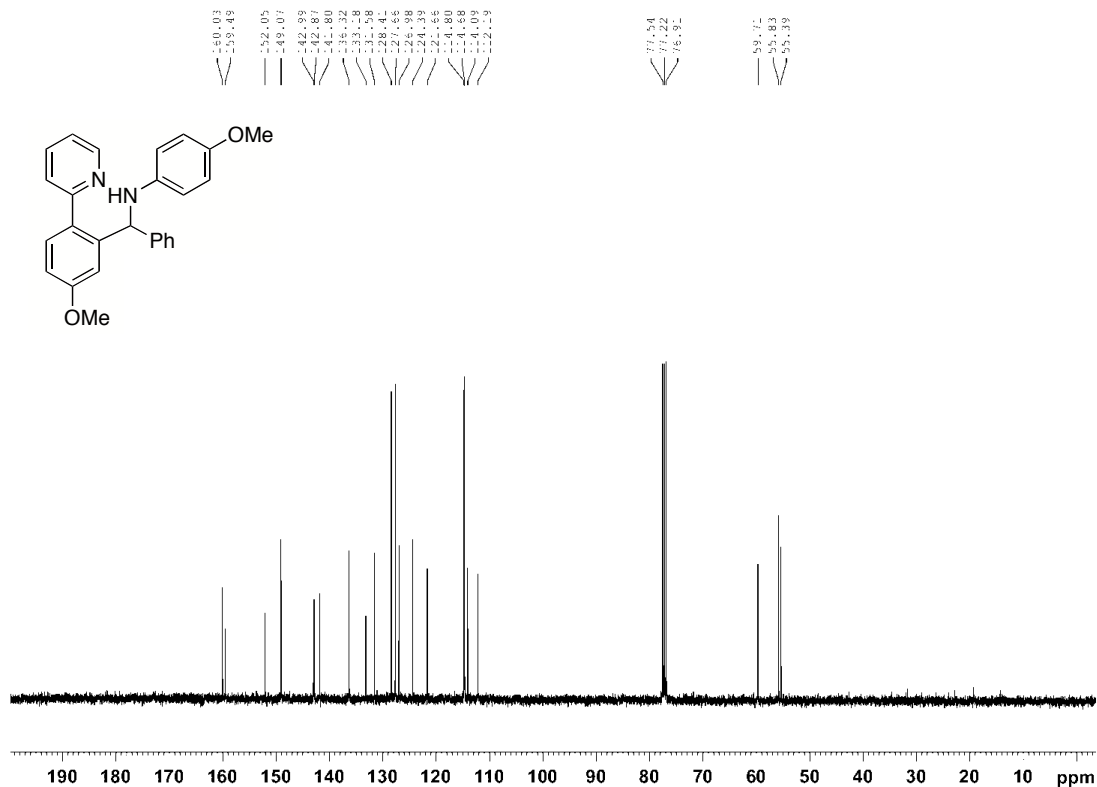





3f

GK03-539, <sup>1</sup>H NMR CDCl<sub>3</sub> BBFO1 400MHz

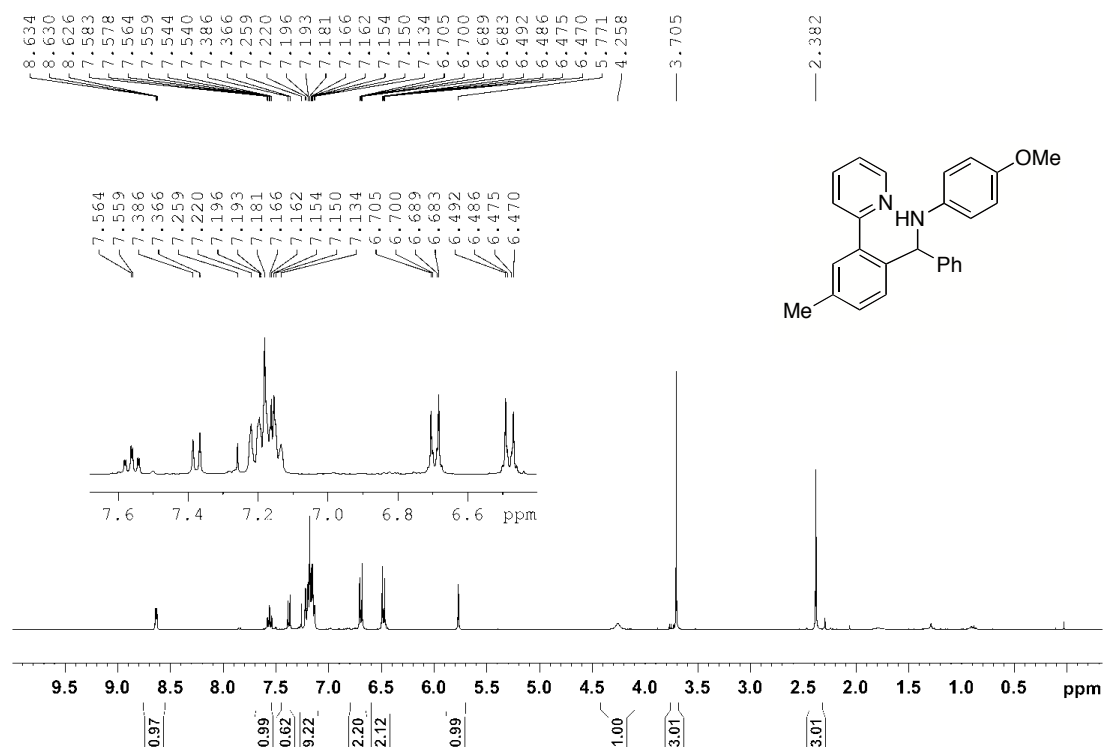

GK03-539, <sup>13</sup>C NMR CDCl<sub>3</sub> BBFO1 400MHz

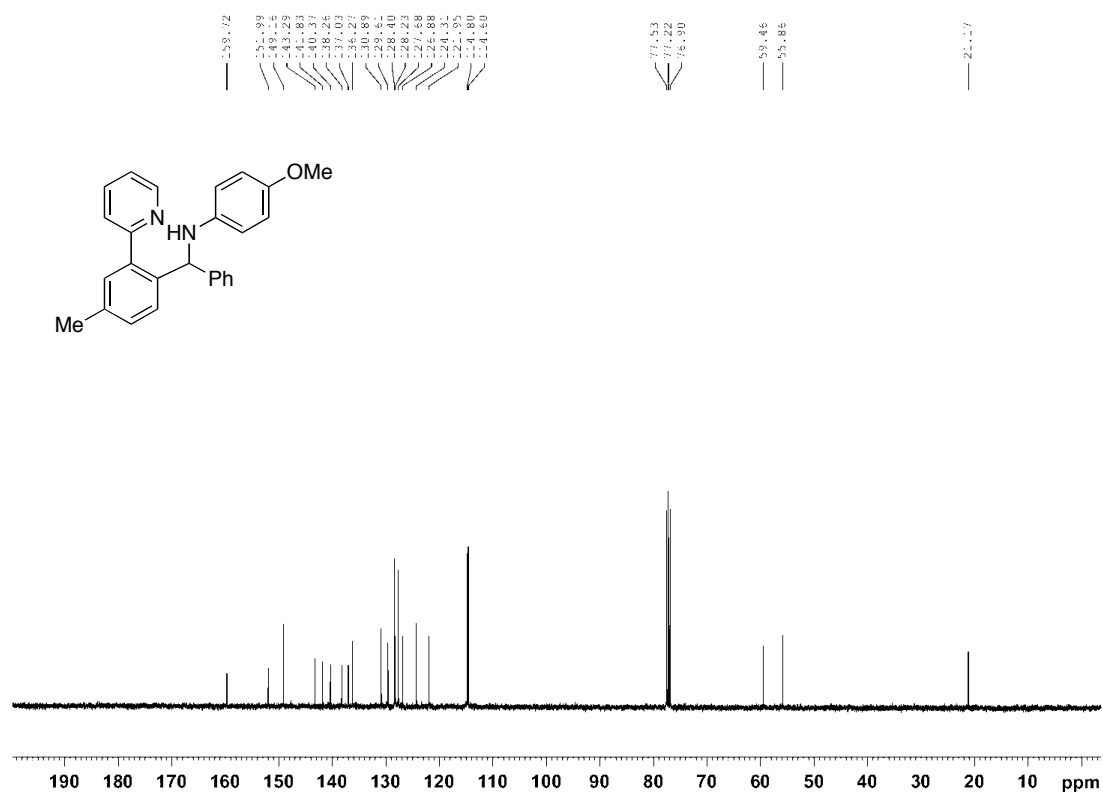

3g

GK03-582-2, <sup>1</sup>H NMR CDCl<sub>3</sub> 400 MHz BBOFO1

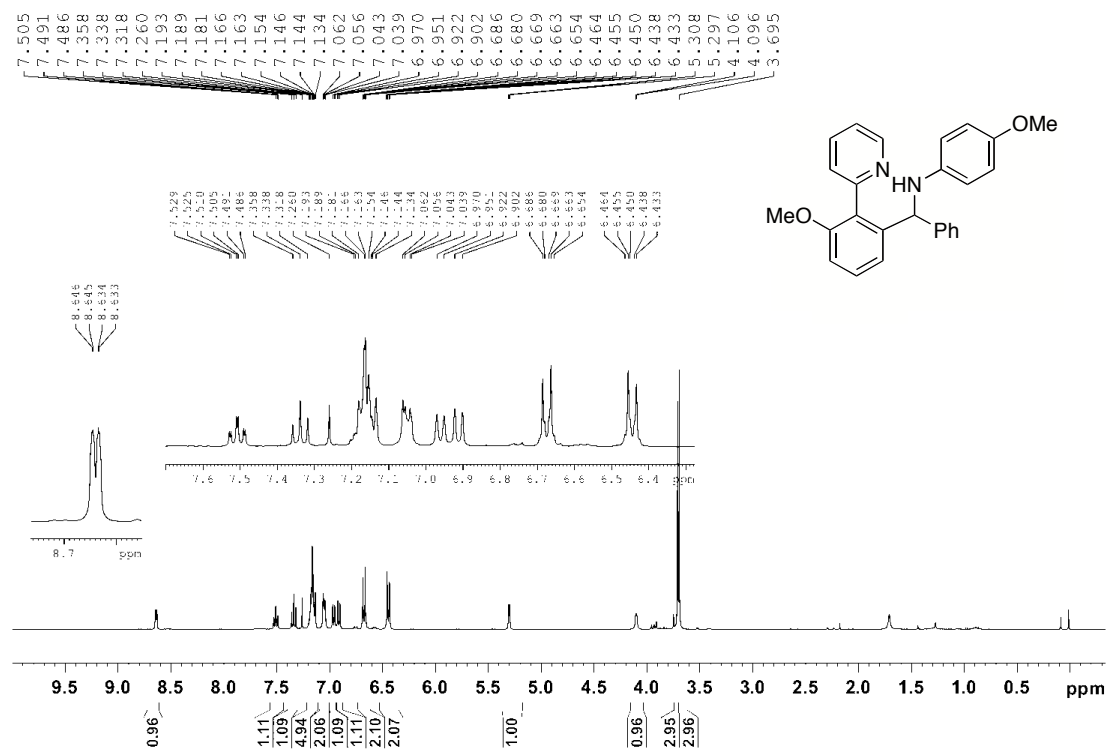

GK03-582-2, <sup>13</sup>C NMR CDCl<sub>3</sub> 400 MHz BBOFO1

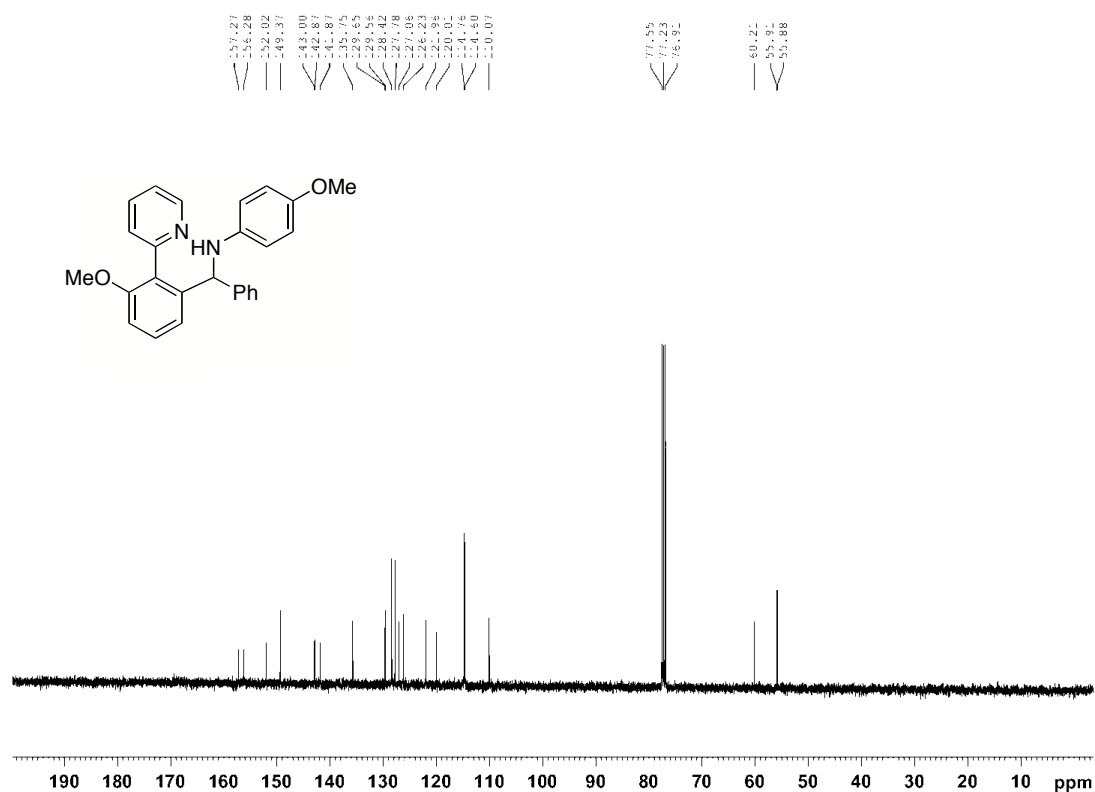

3h

GK03-570, 1H NMR CDC13 400 MHz BBOF01

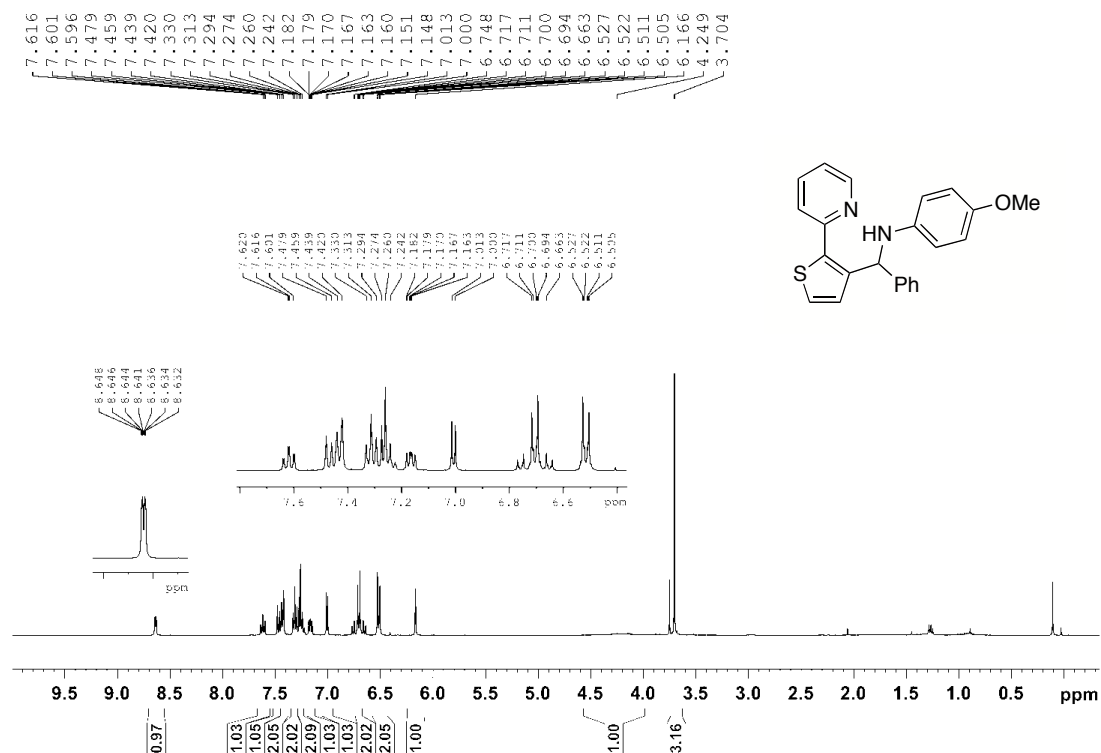

GK03-570, 13C NMR CDC13 400 MHz BBOF01

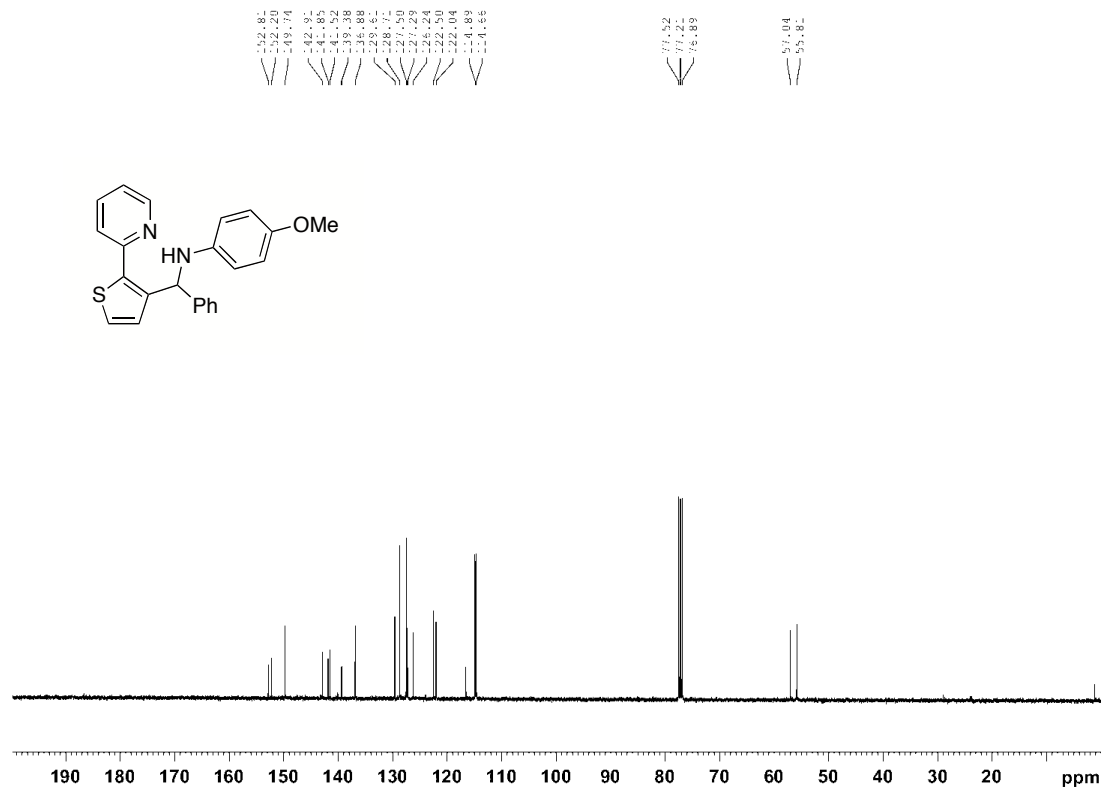

3i

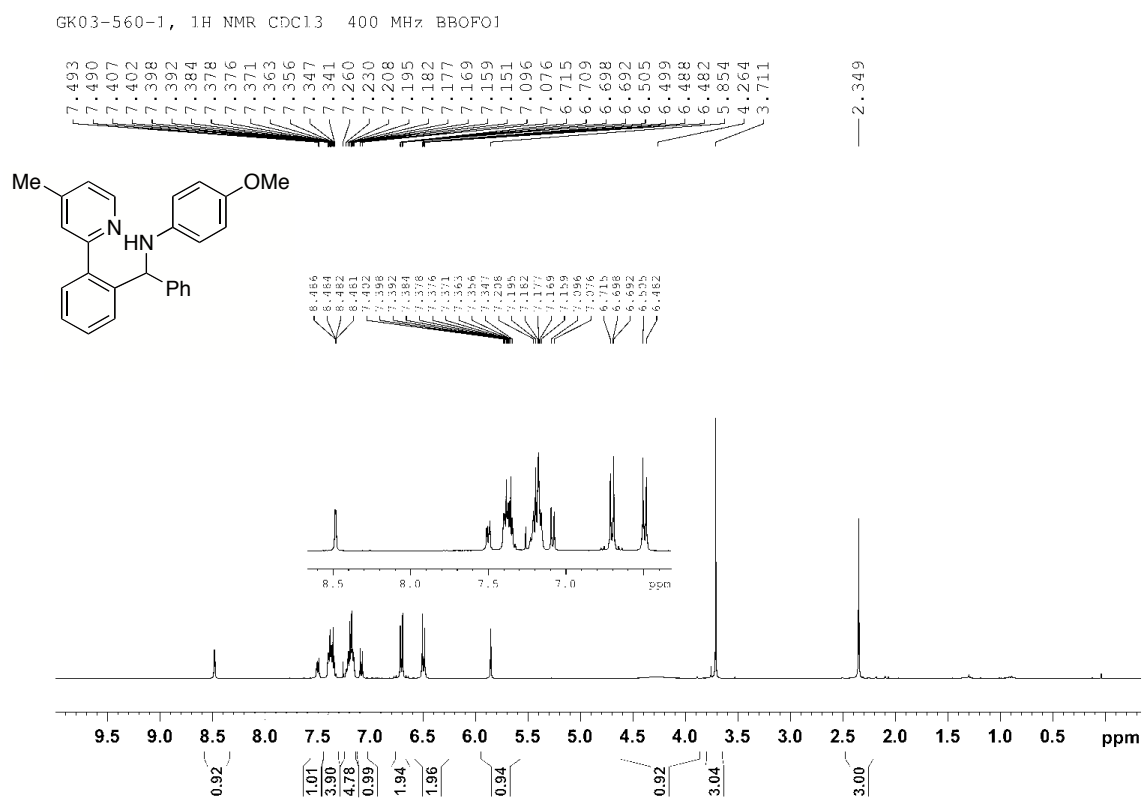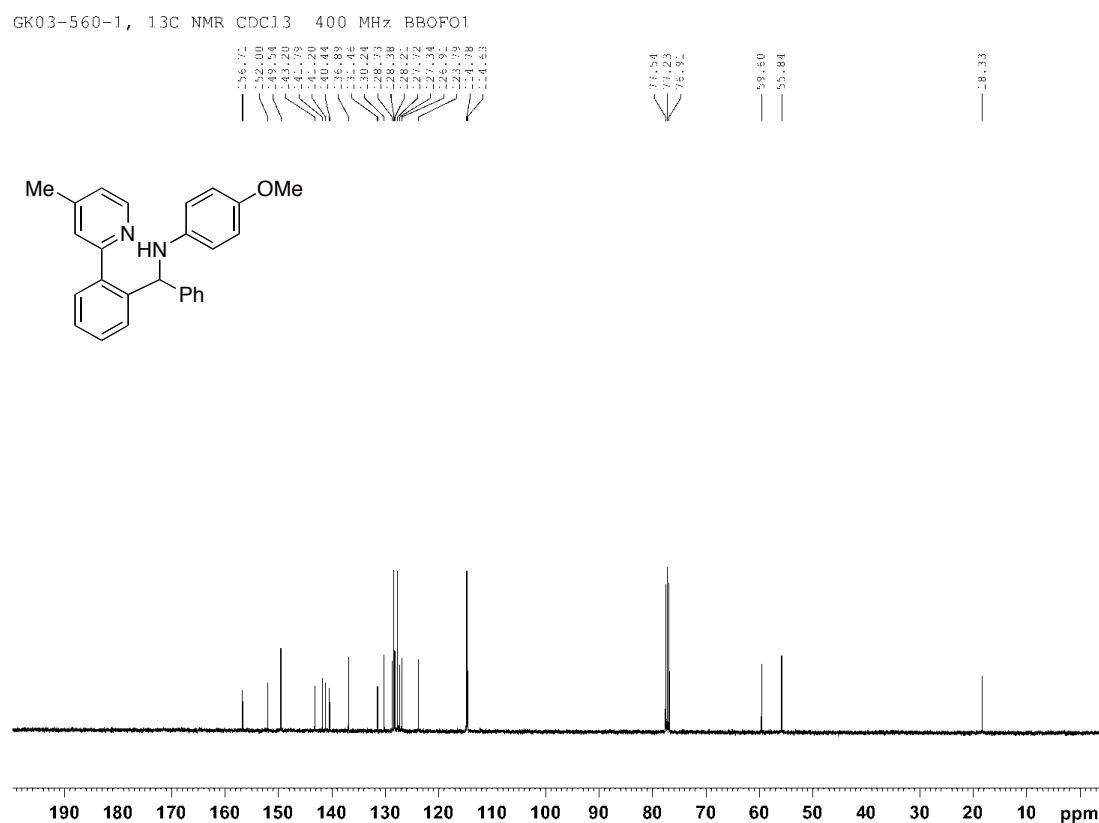

3j

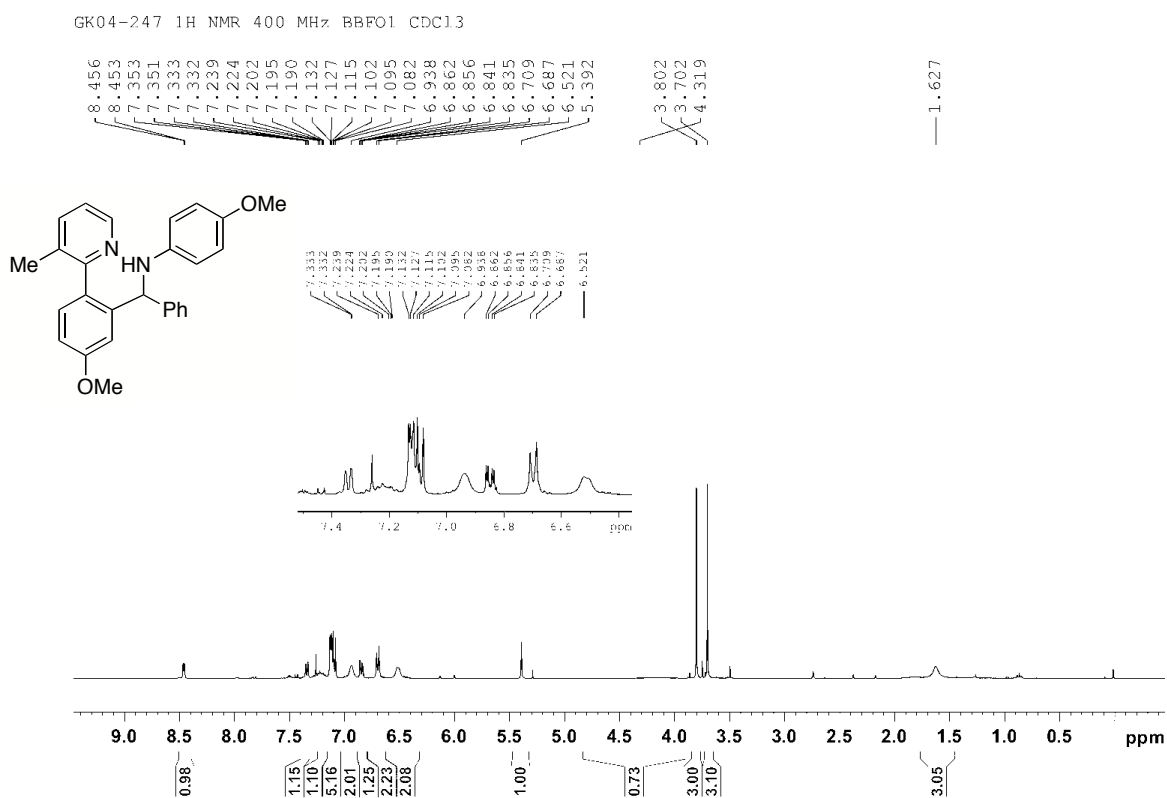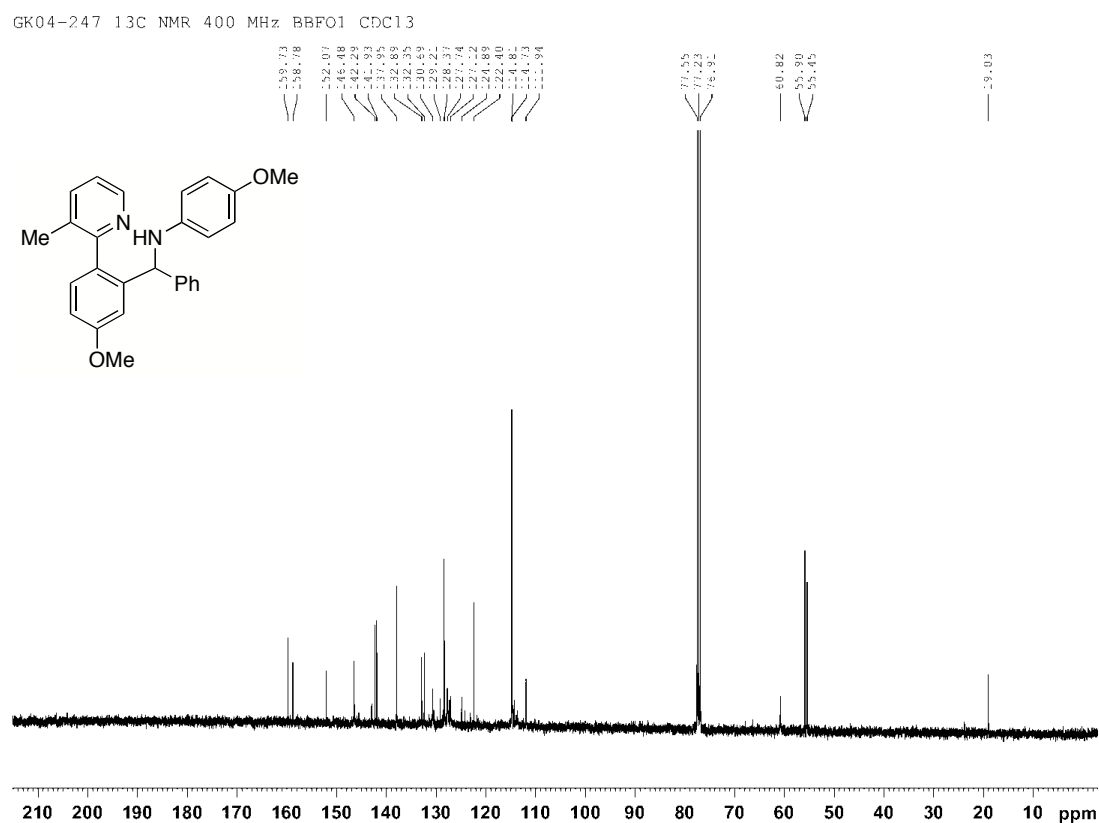

3k

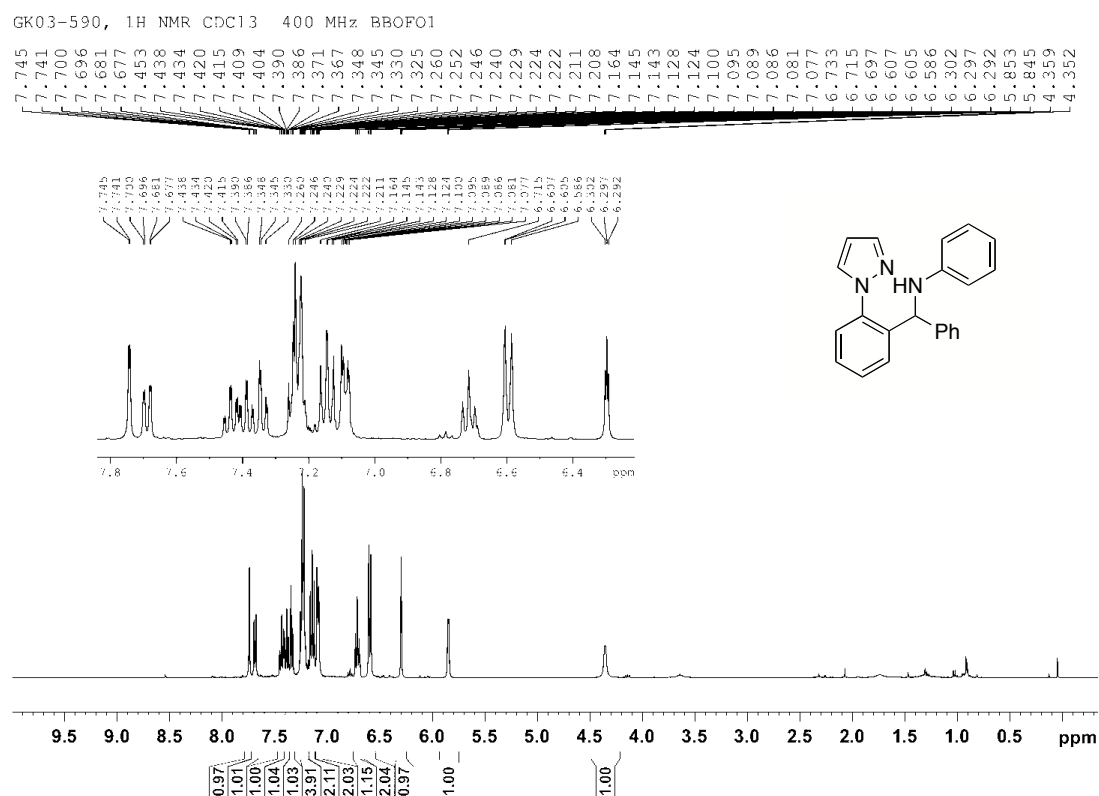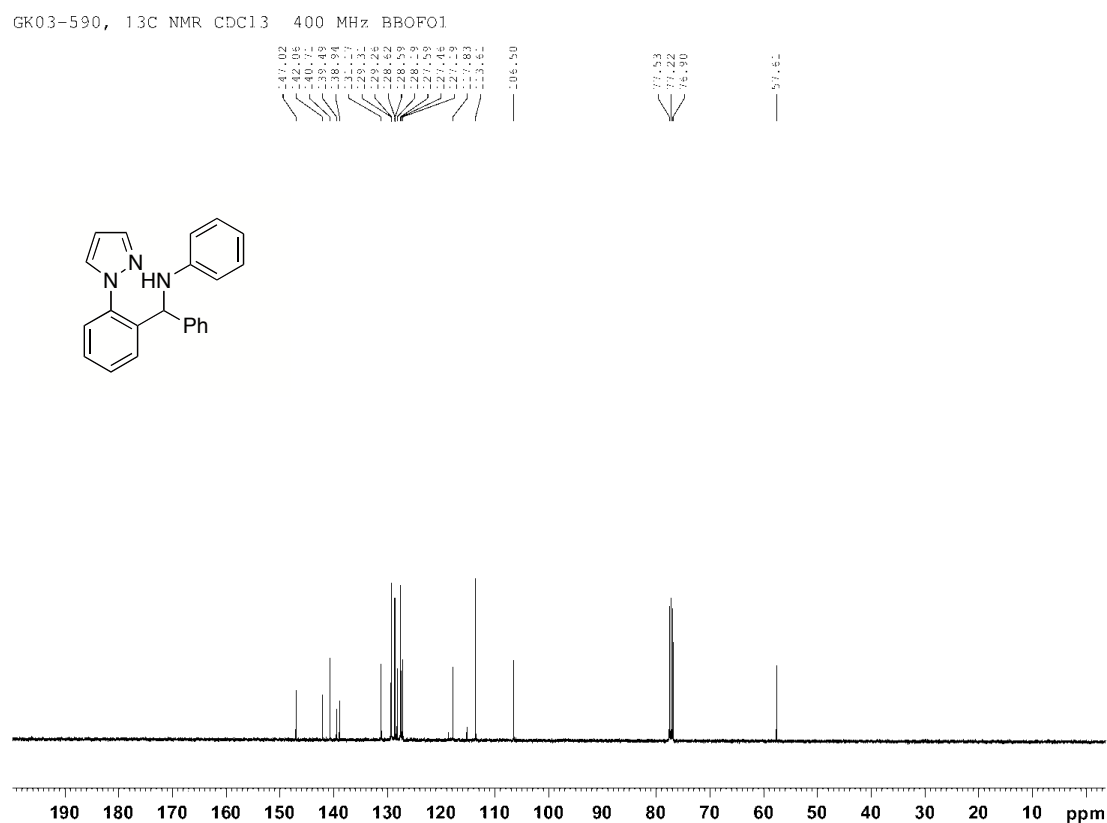

31

GK03-591, <sup>1</sup>H NMR CDC13 400 MHz BBOFO1

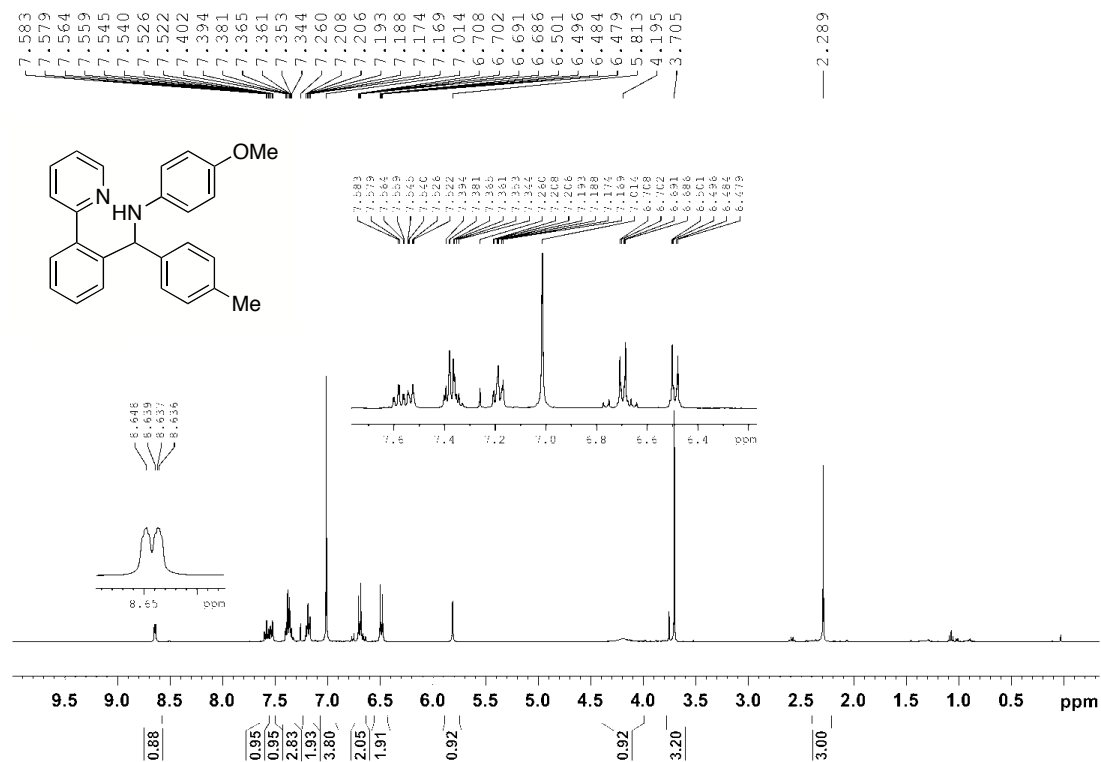

GK03-591, <sup>13</sup>C NMR CDC13 400 MHz BBOFO1

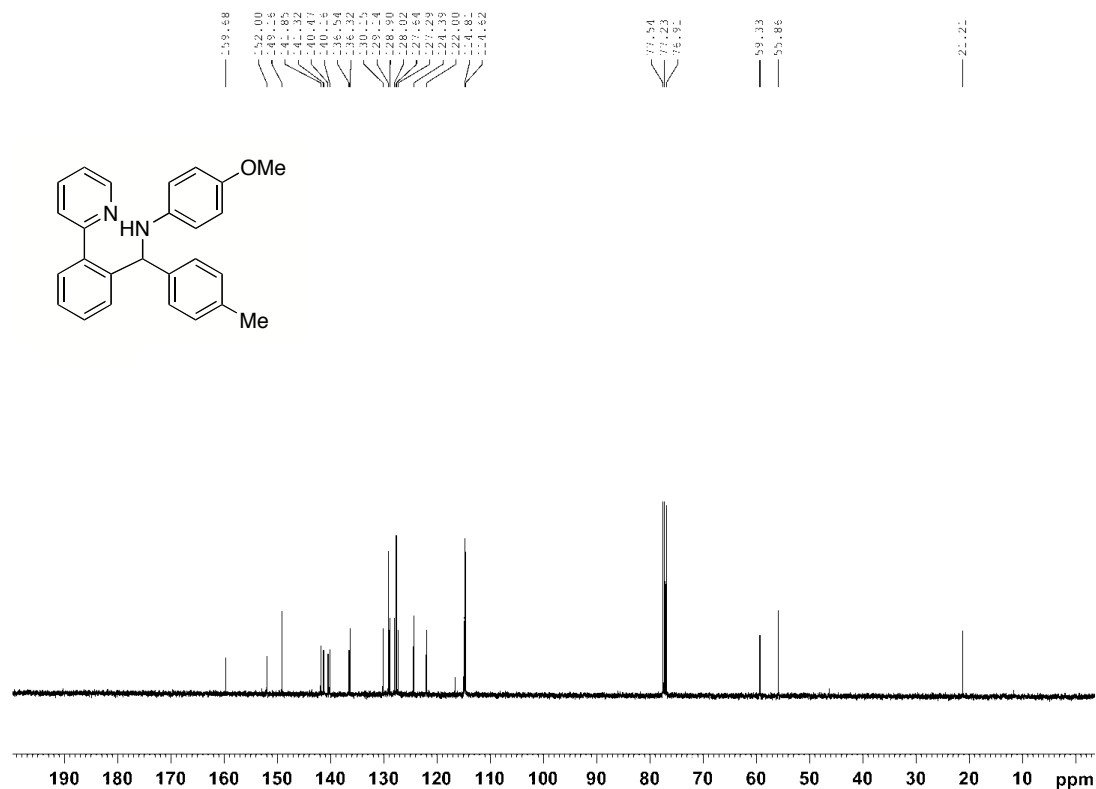

**3m**

GK04-04, <sup>1</sup>H NMR CDCl<sub>3</sub> 400MHz, BBFO1

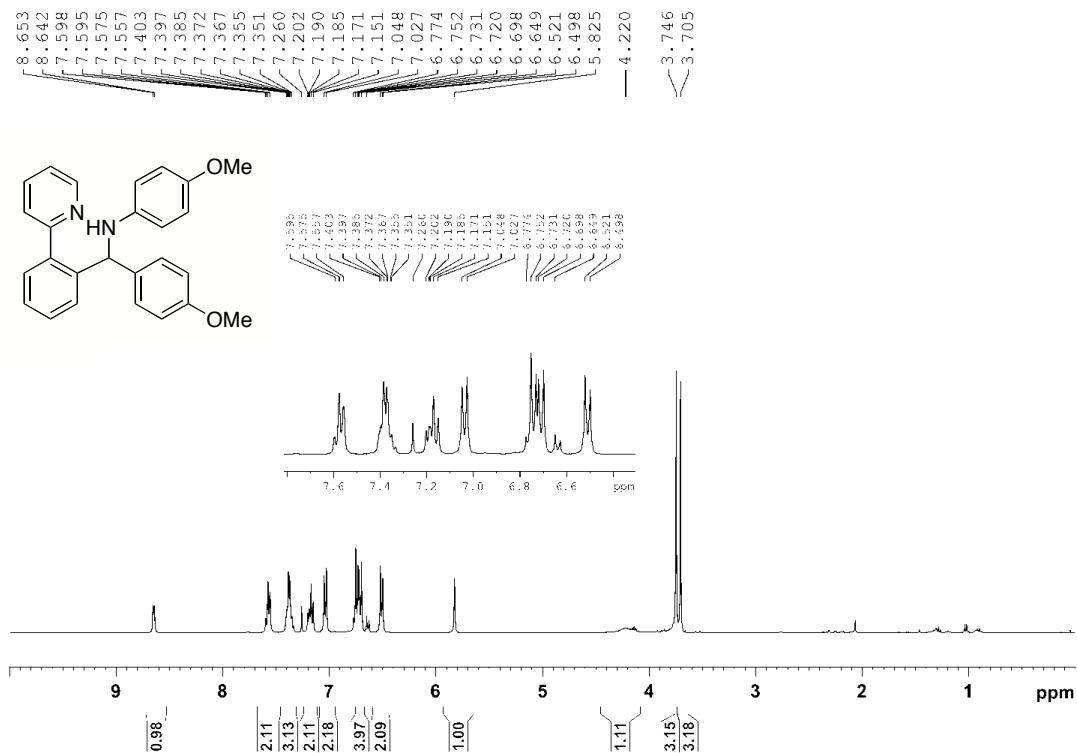

GK04-04, <sup>13</sup>C NMR CDCl<sub>3</sub> 400MHz, BBFO1

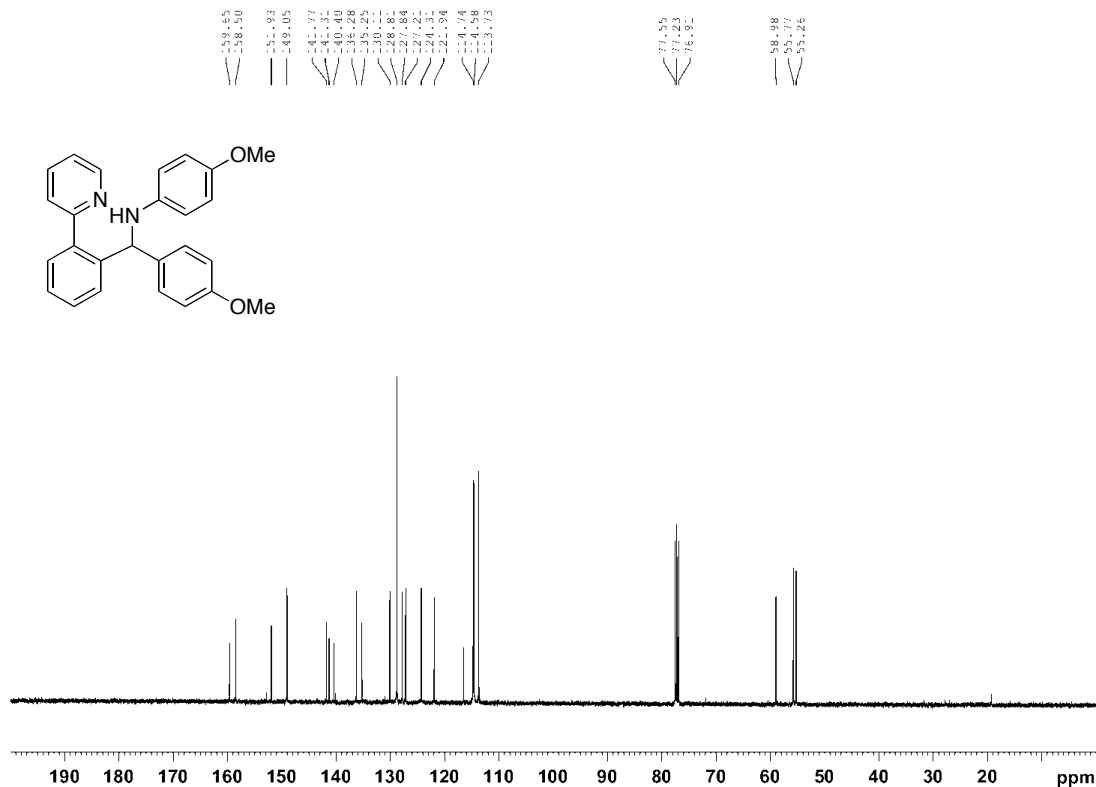

**3n**

GK04-03, <sup>1</sup>H NMR CDCl<sub>3</sub> 400MHz, BBFO1

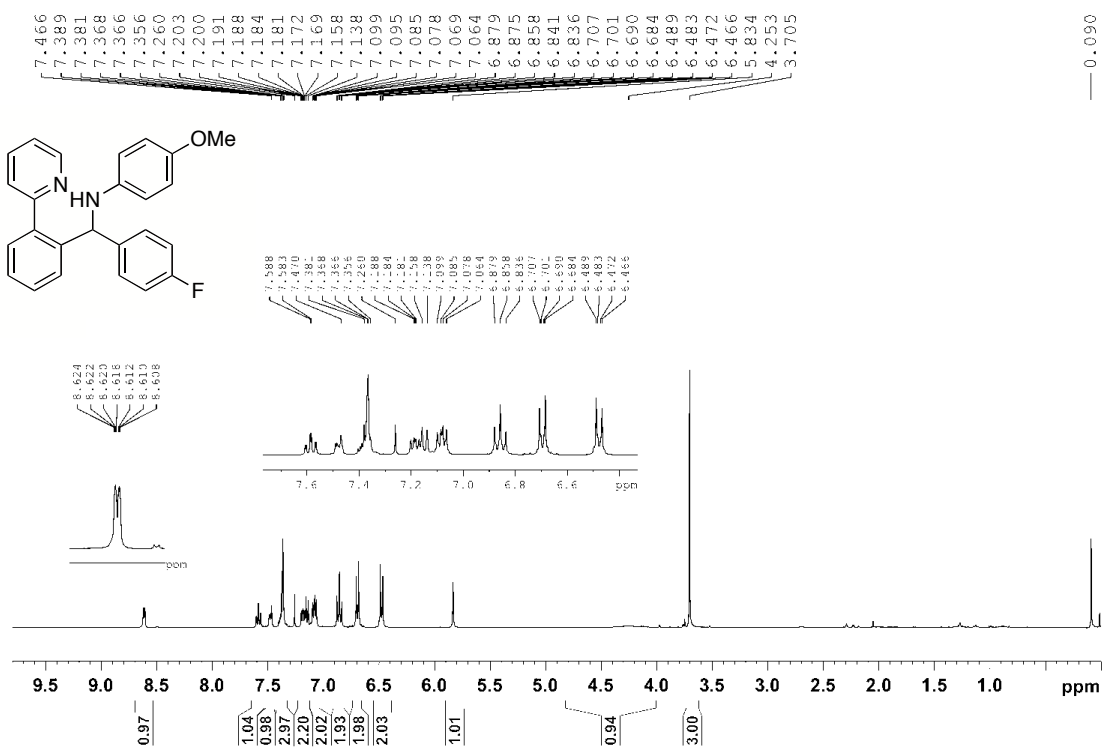



3p

GK04-10, <sup>1</sup>H NMR CDCl<sub>3</sub> 400MHz, BBFO1

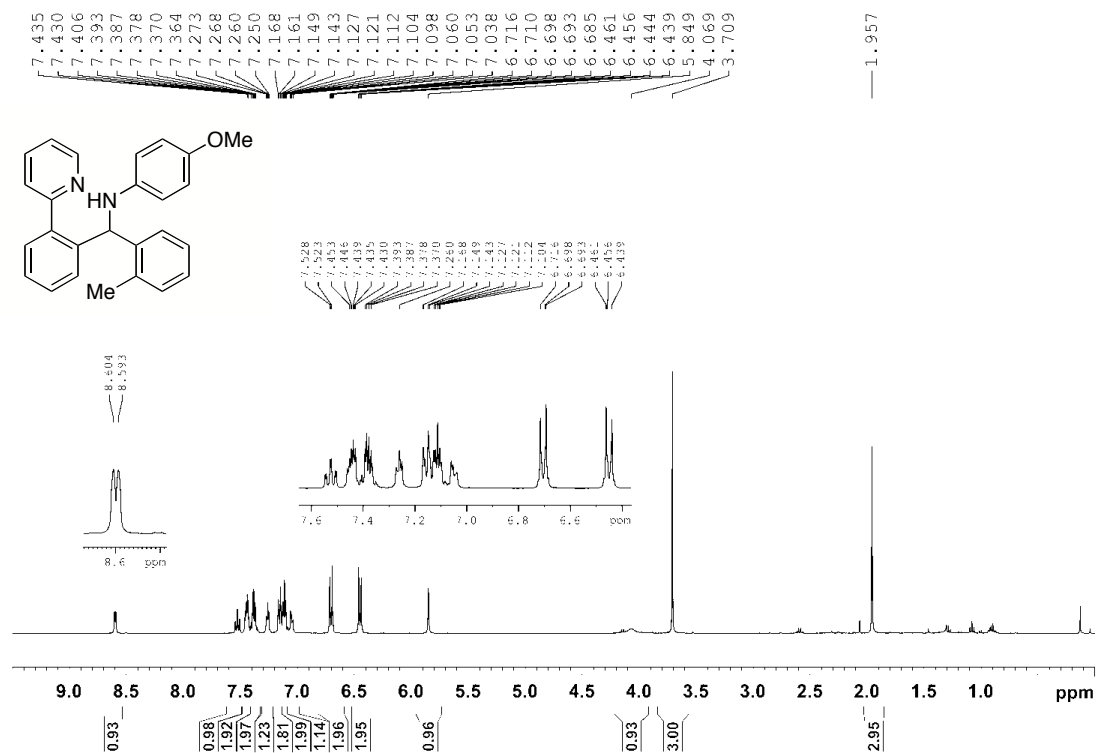

GK04-10, <sup>13</sup>C NMR CDCl<sub>3</sub> 400MHz, BBFO1

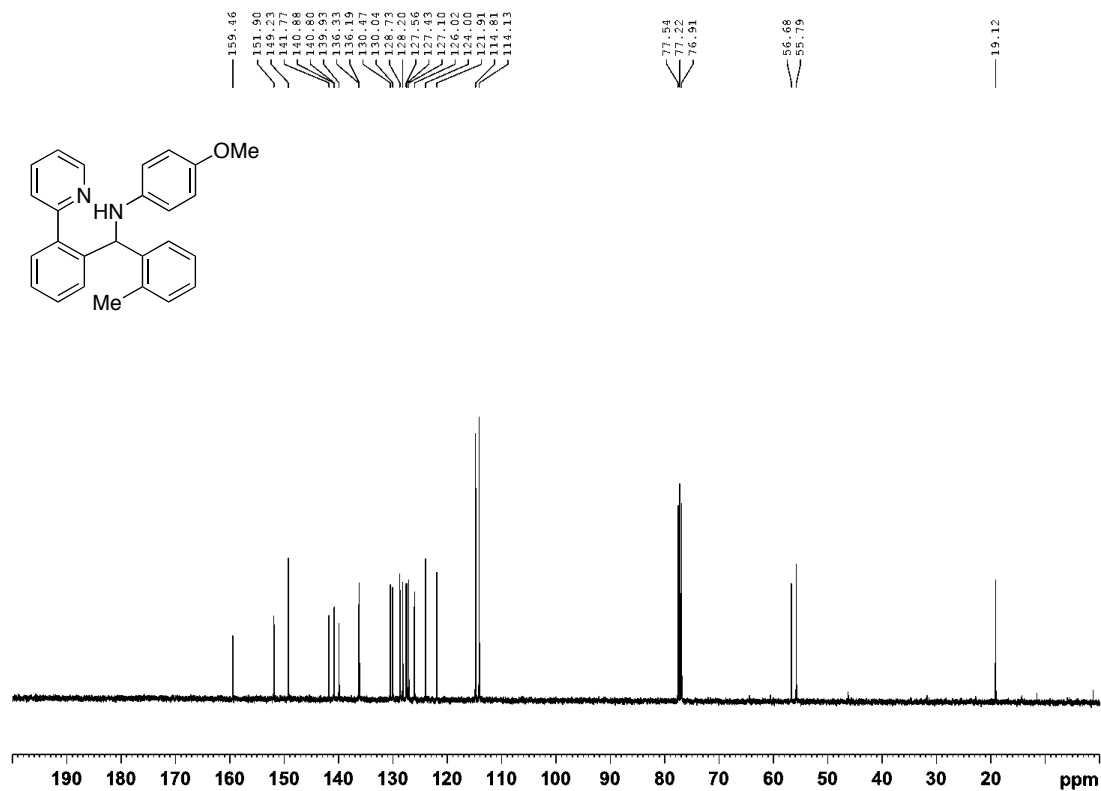

3q

GK04-19-1, <sup>1</sup>H NMR CDCl<sub>3</sub> 400MHz, BBFO1

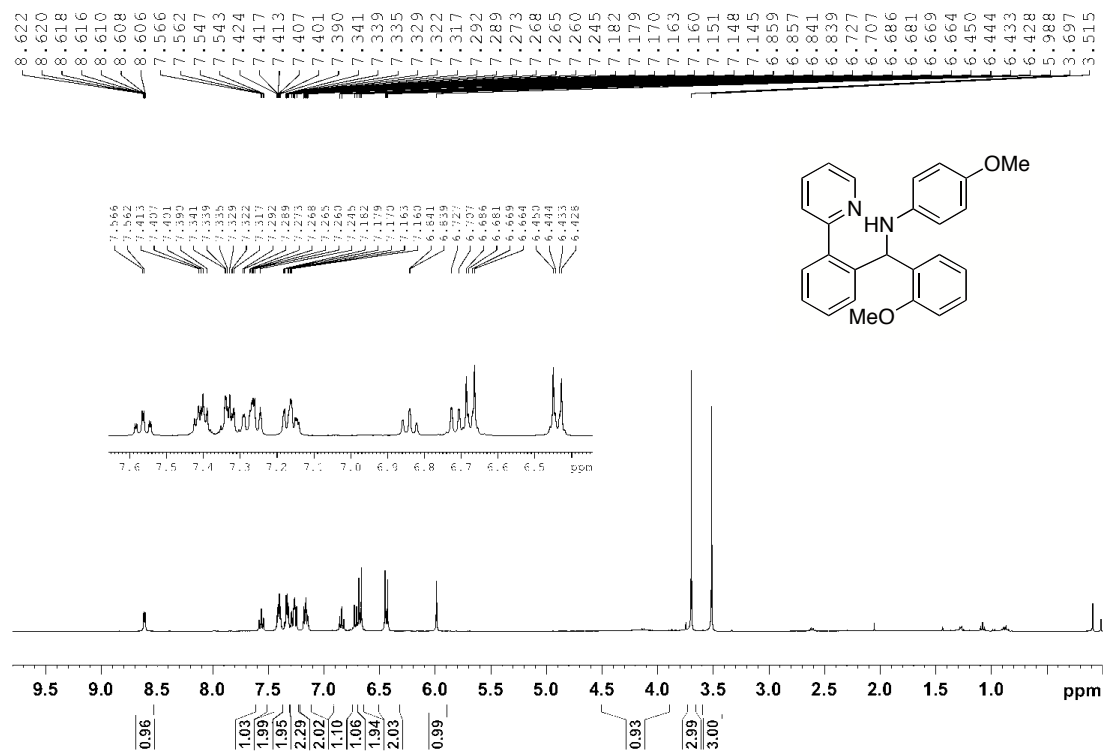

GK04-19-1, <sup>13</sup>C NMR CDCl<sub>3</sub> 400MHz, BBFO1

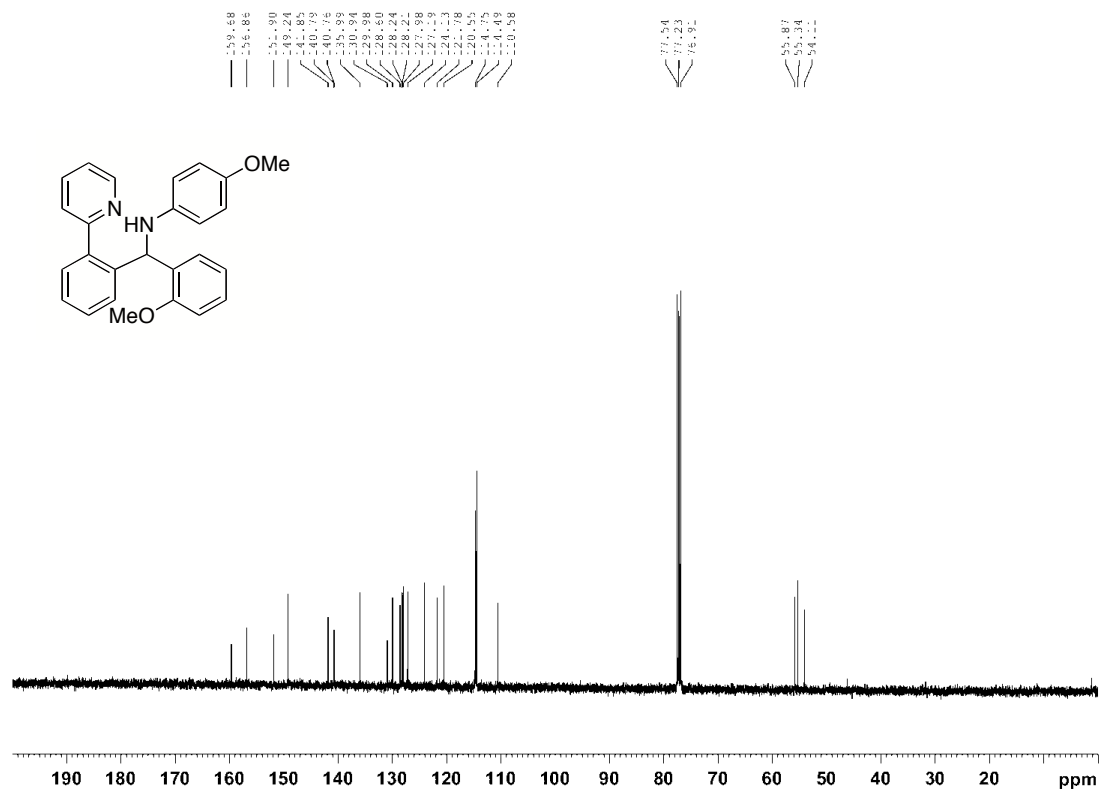

3r

GK04-15, <sup>1</sup>H NMR CDCl<sub>3</sub> 400MHz, BBFO1

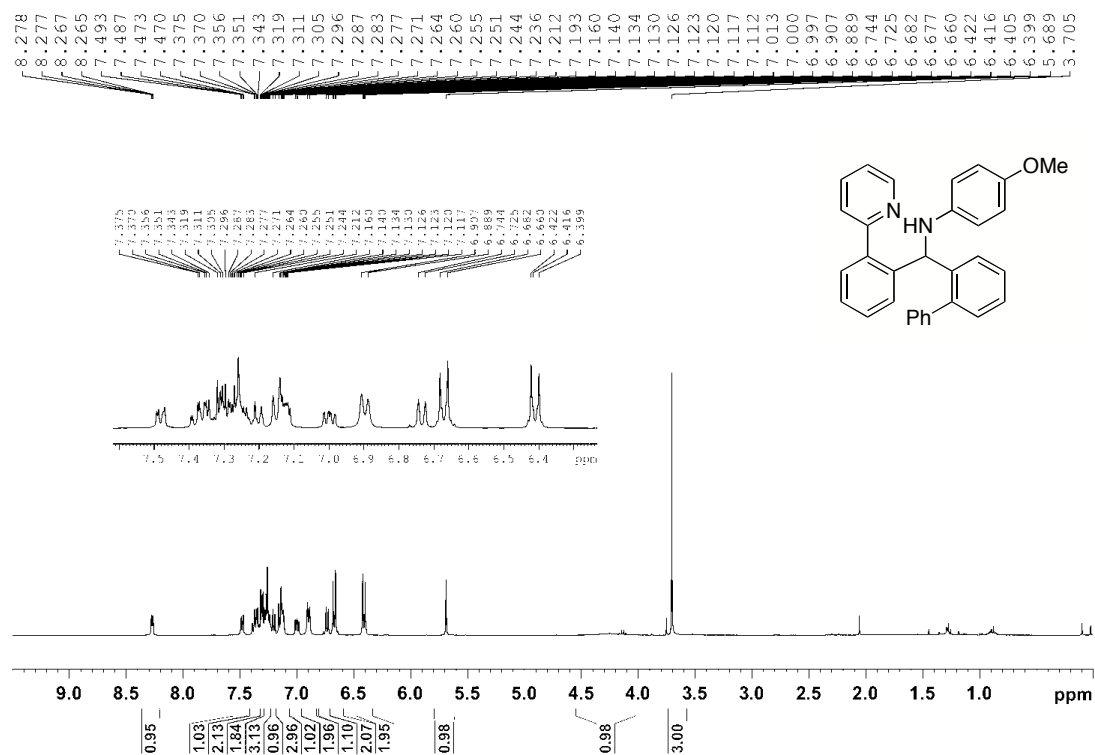

GK04-15, <sup>13</sup>C NMR CDCl<sub>3</sub> 400MHz, BBFO1

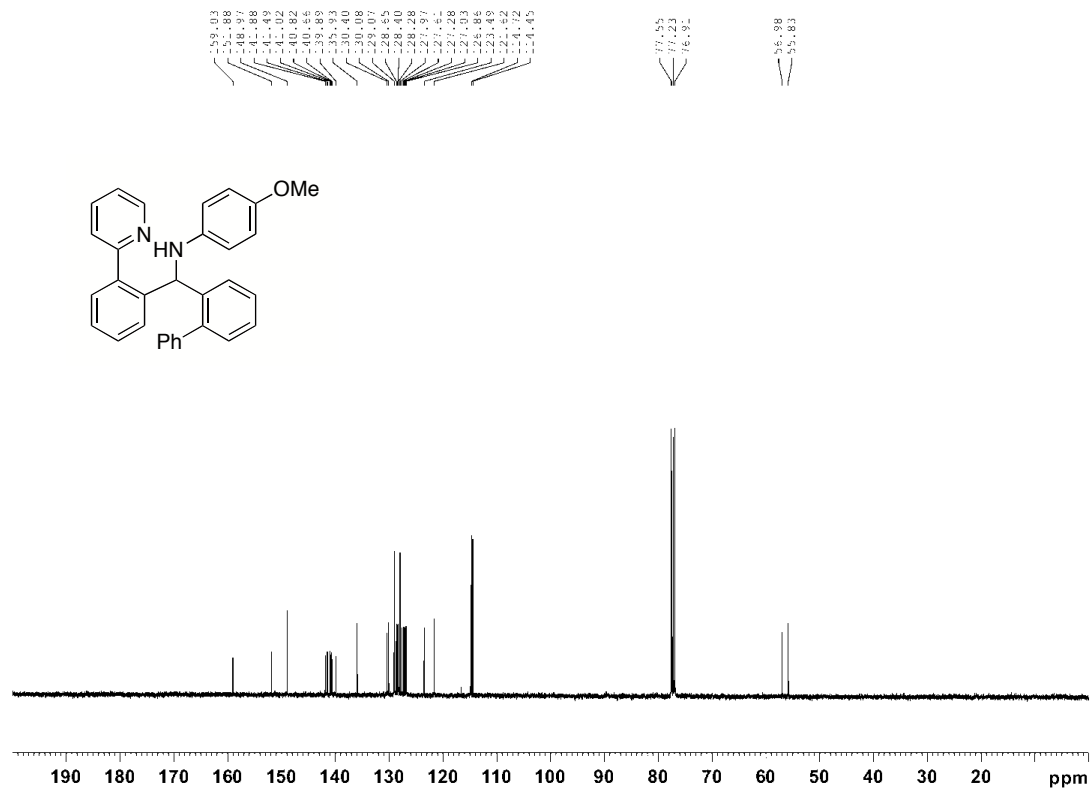

5

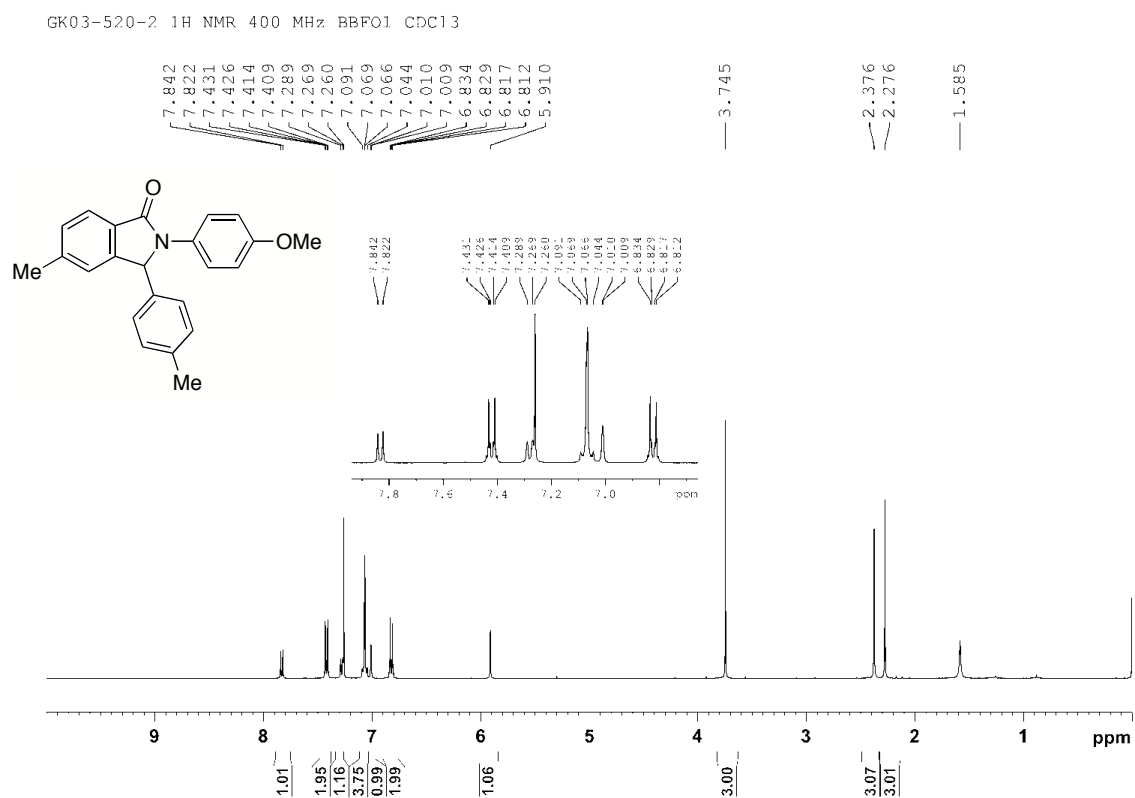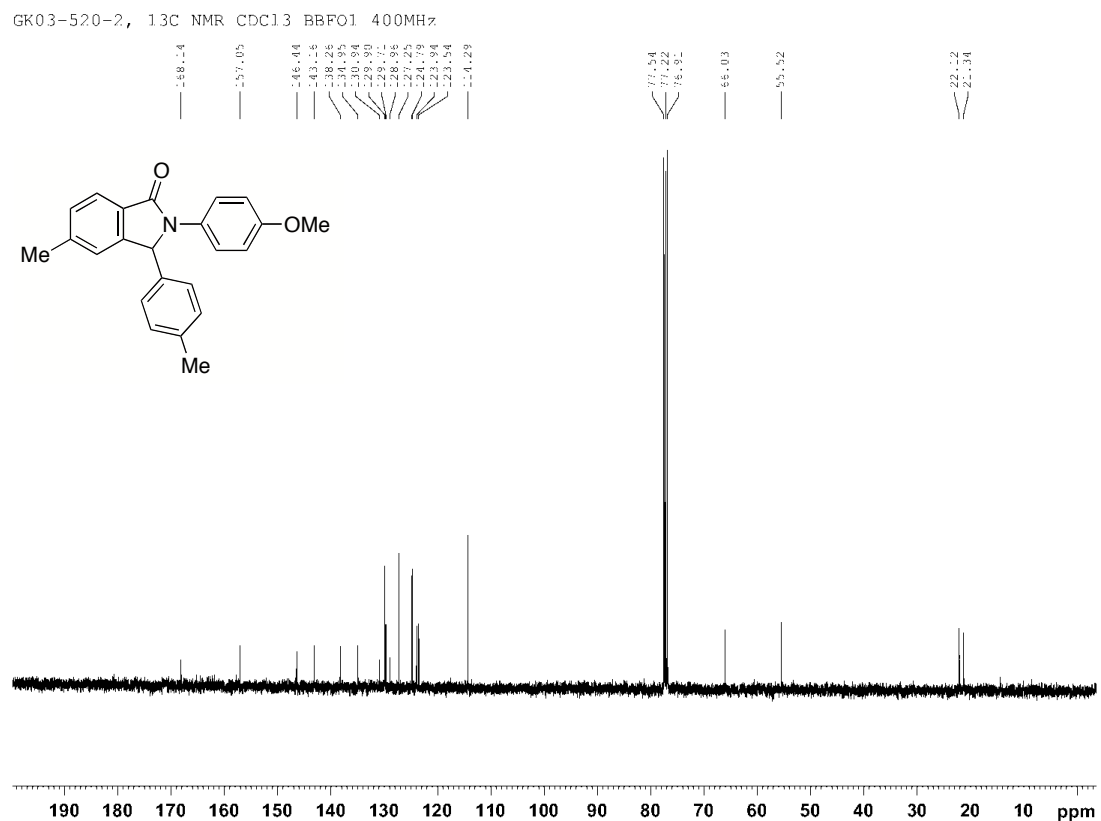

6

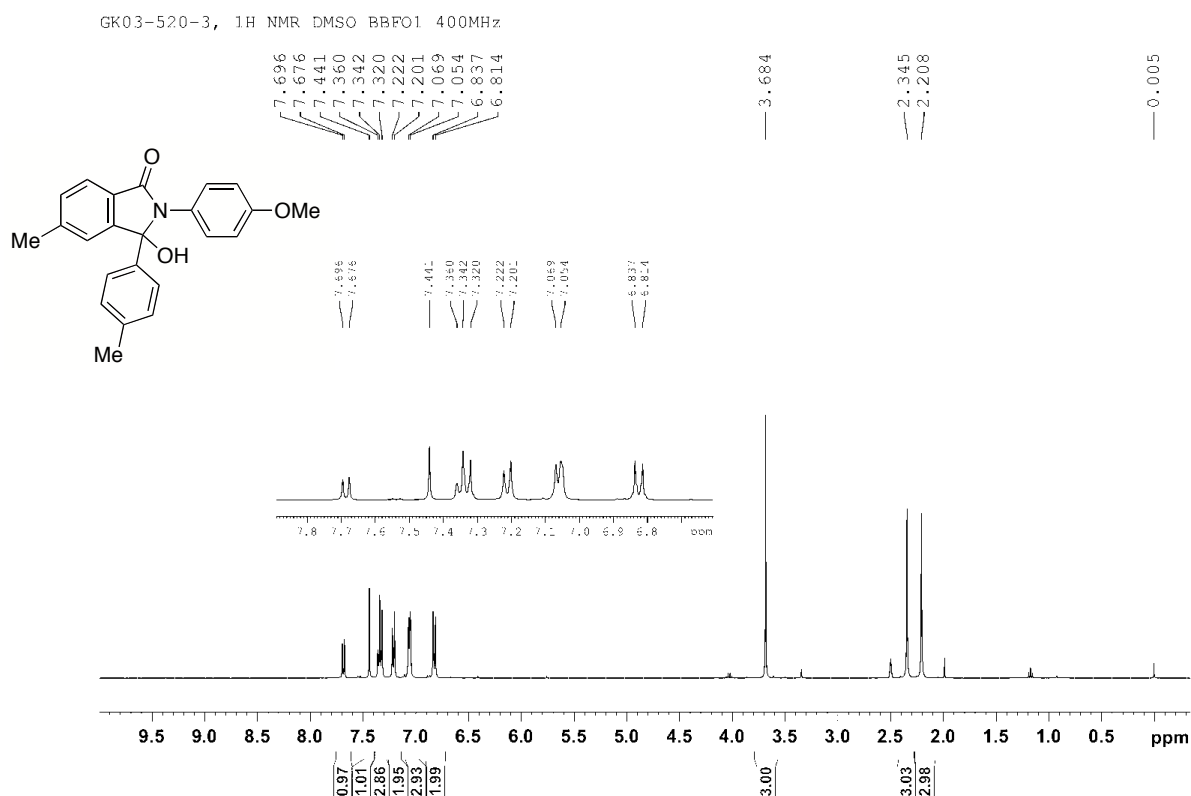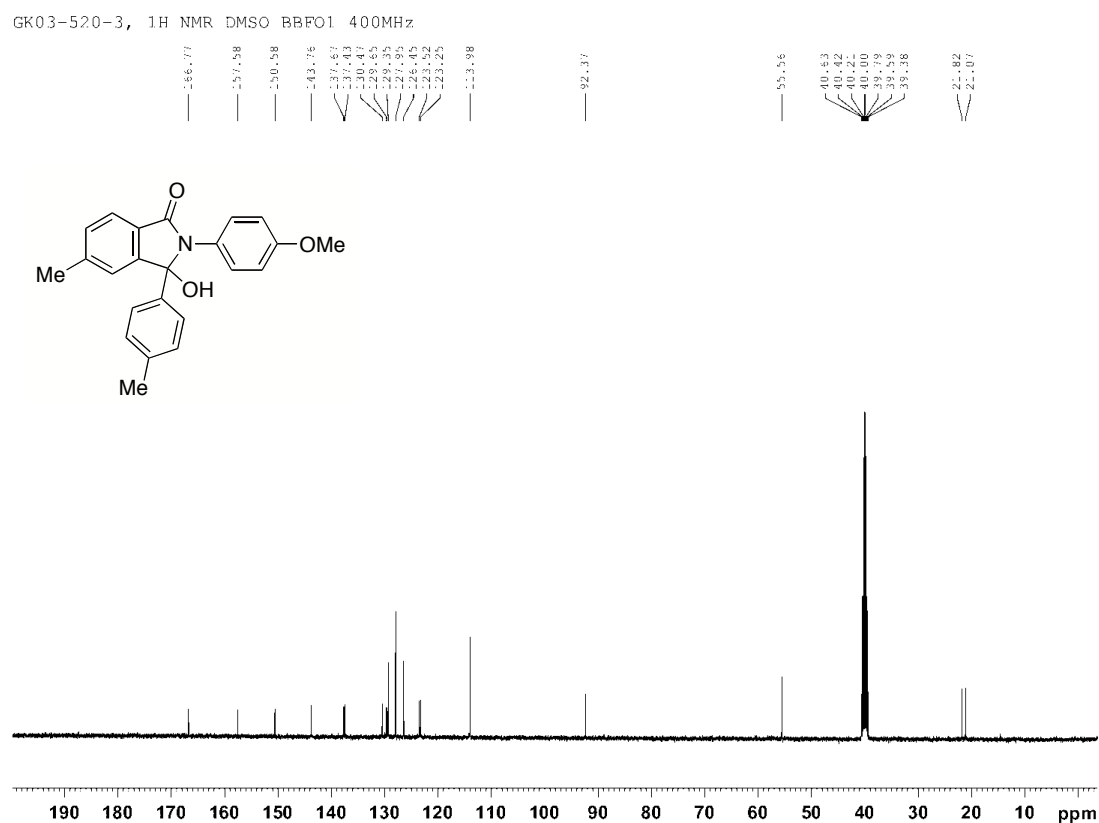

**7a**

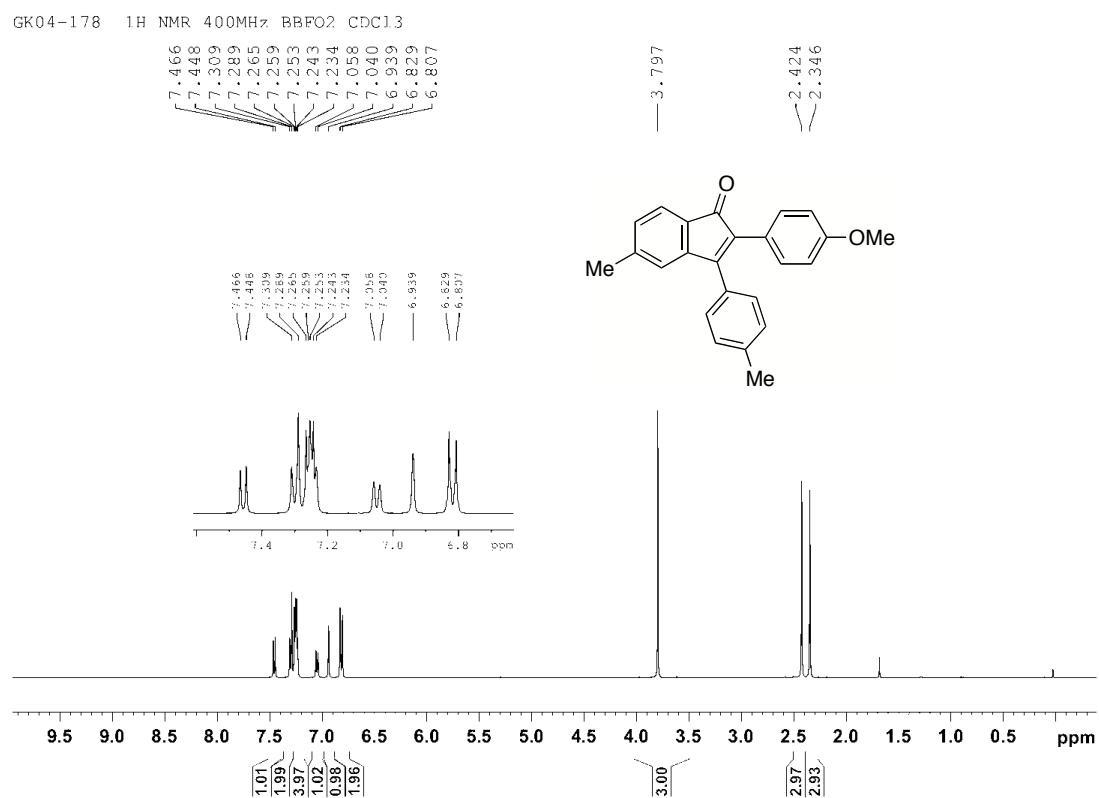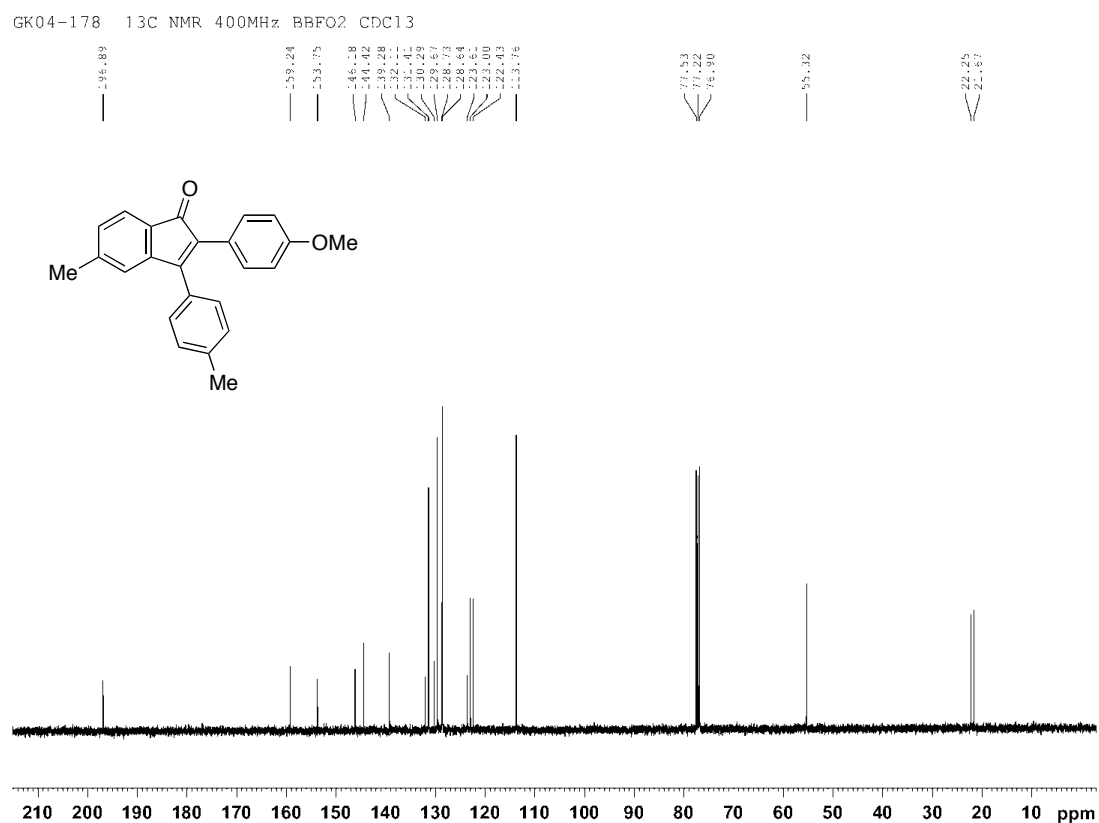

7b

GK04-21 1H NMR CDCl<sub>3</sub> 400 MHz, BBFO2

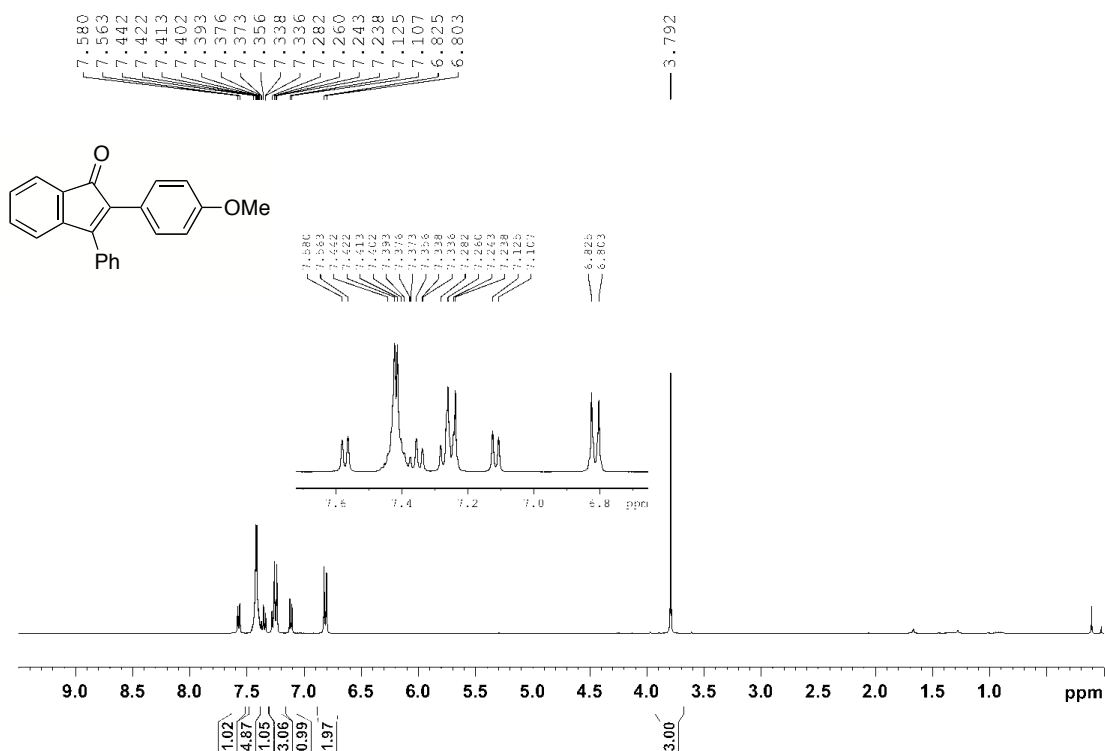

GK04-21 13C NMR CDCl<sub>3</sub> 400 MHz, BBFO2

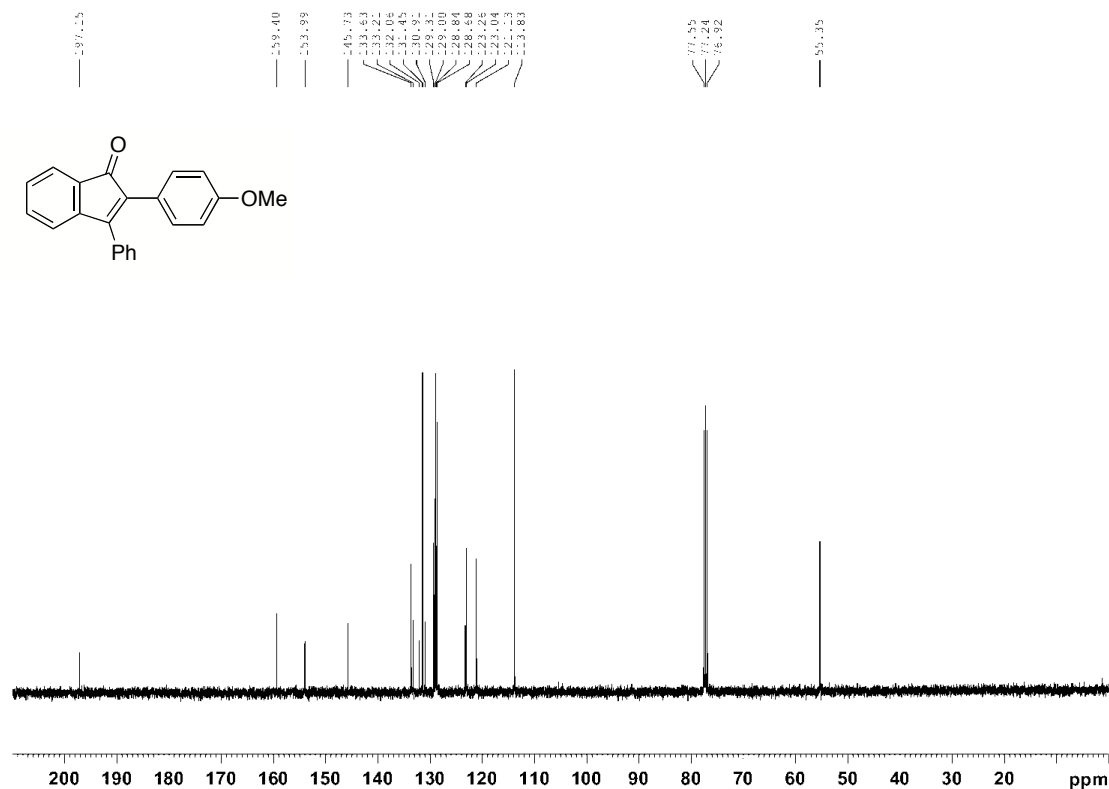

7c

GK04-214 1H NMR 400 MHz BBFO1 CDC13

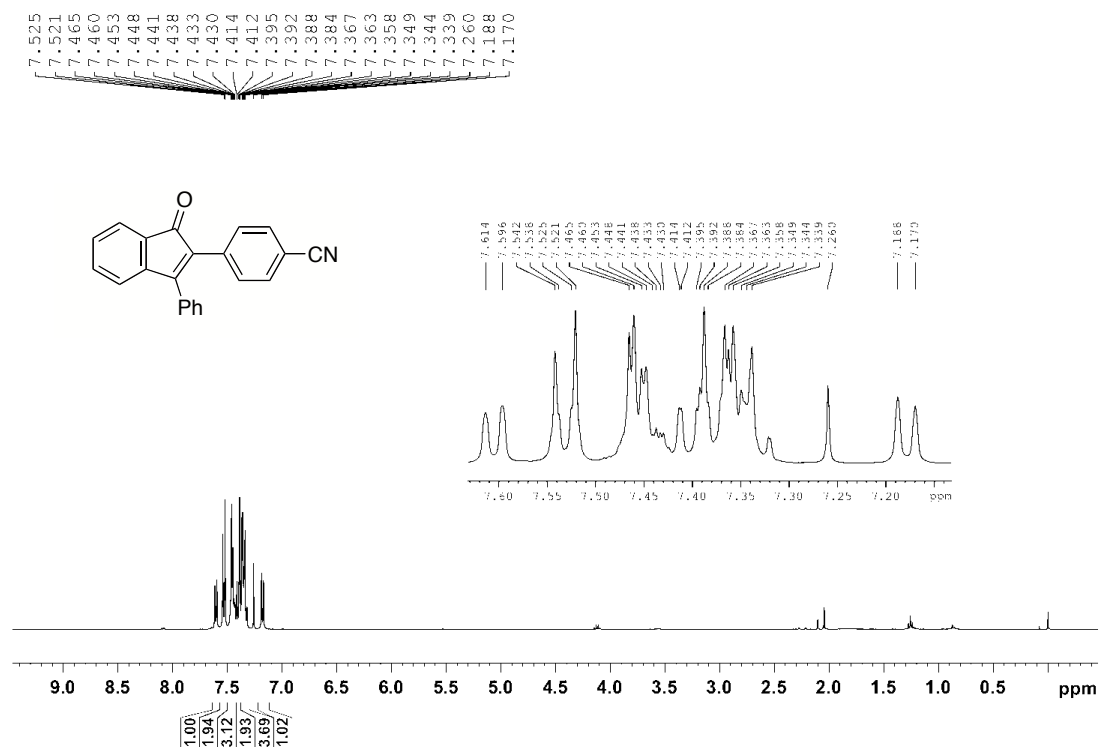

GK04-214 13C NMR 400 MHz BBFO1 CDC13

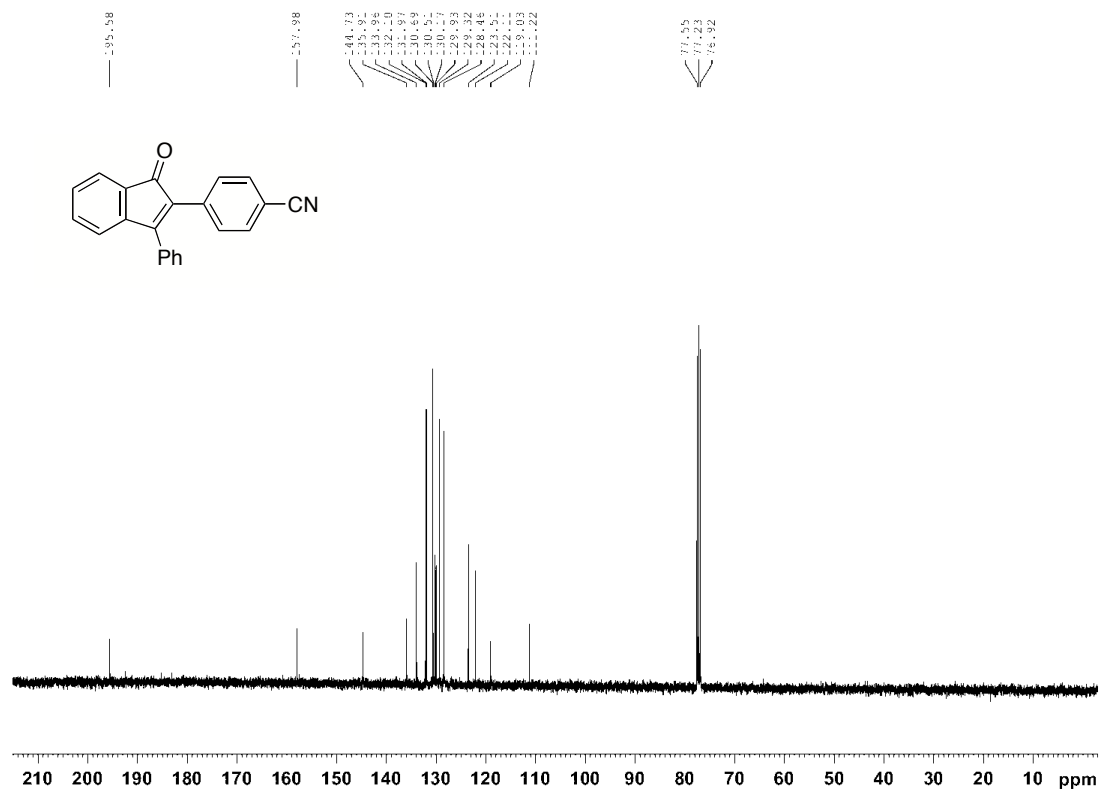

7d

GK04-191, <sup>1</sup>H NMR 400 MHz, BBFO2, CDCl<sub>3</sub>

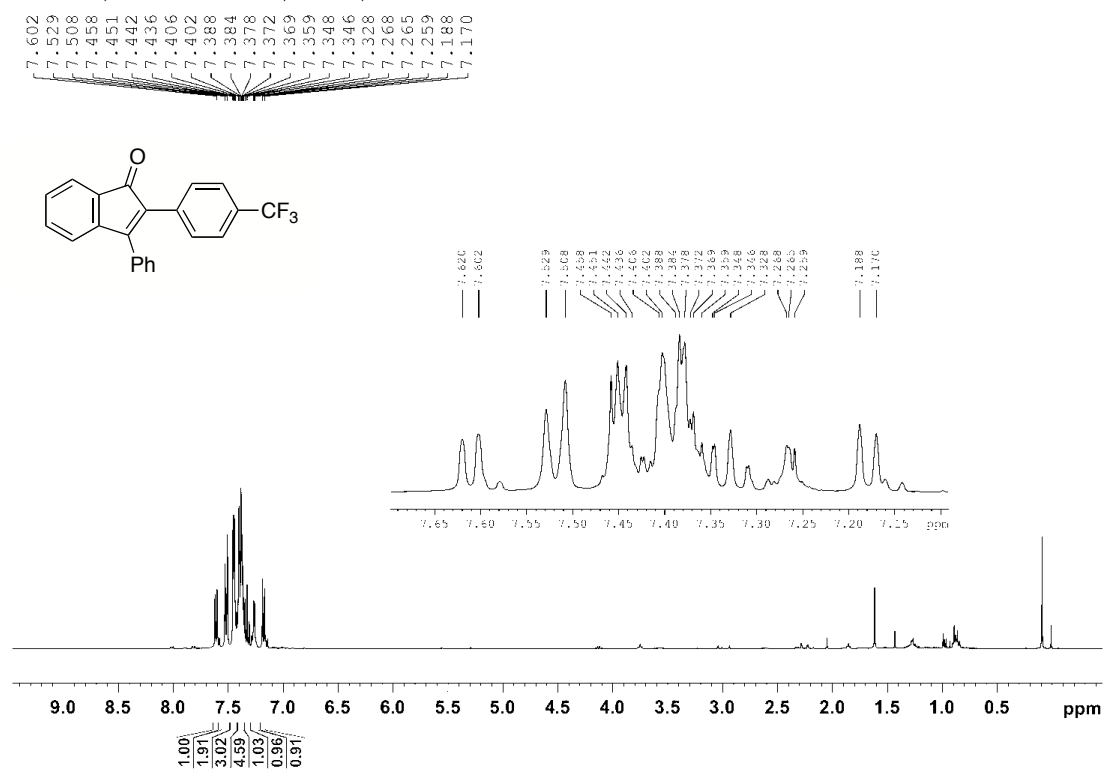

GK04-191, <sup>13</sup>C NMR 400 MHz, BBFO2, CDCl<sub>3</sub>

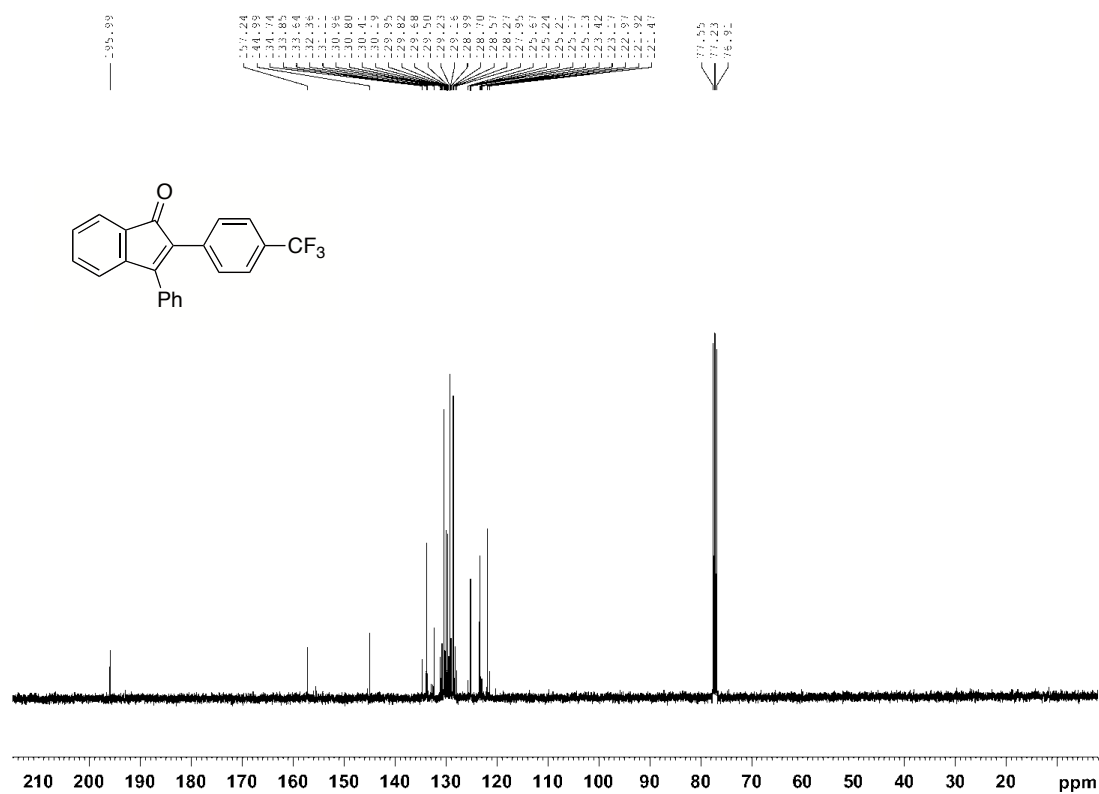

7e

GK04-177 1H NMR 400MHz BBFO2 CDC13

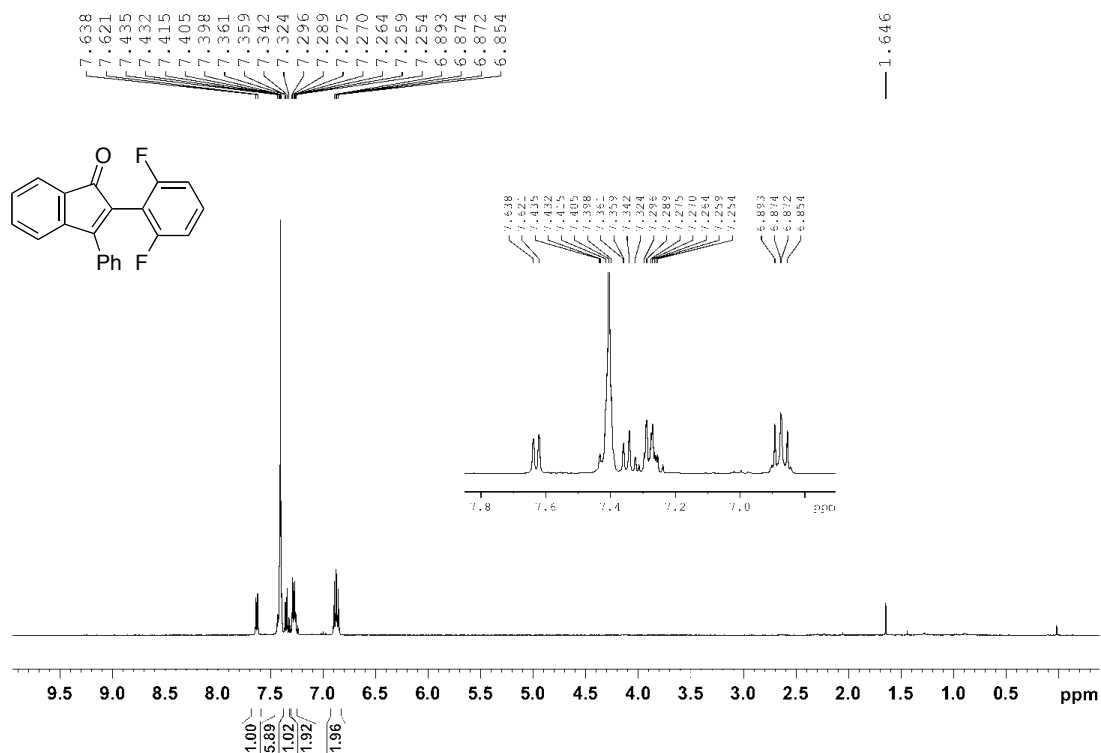

GK04-177 13C NMR 400MHz BBFO2 CDC13

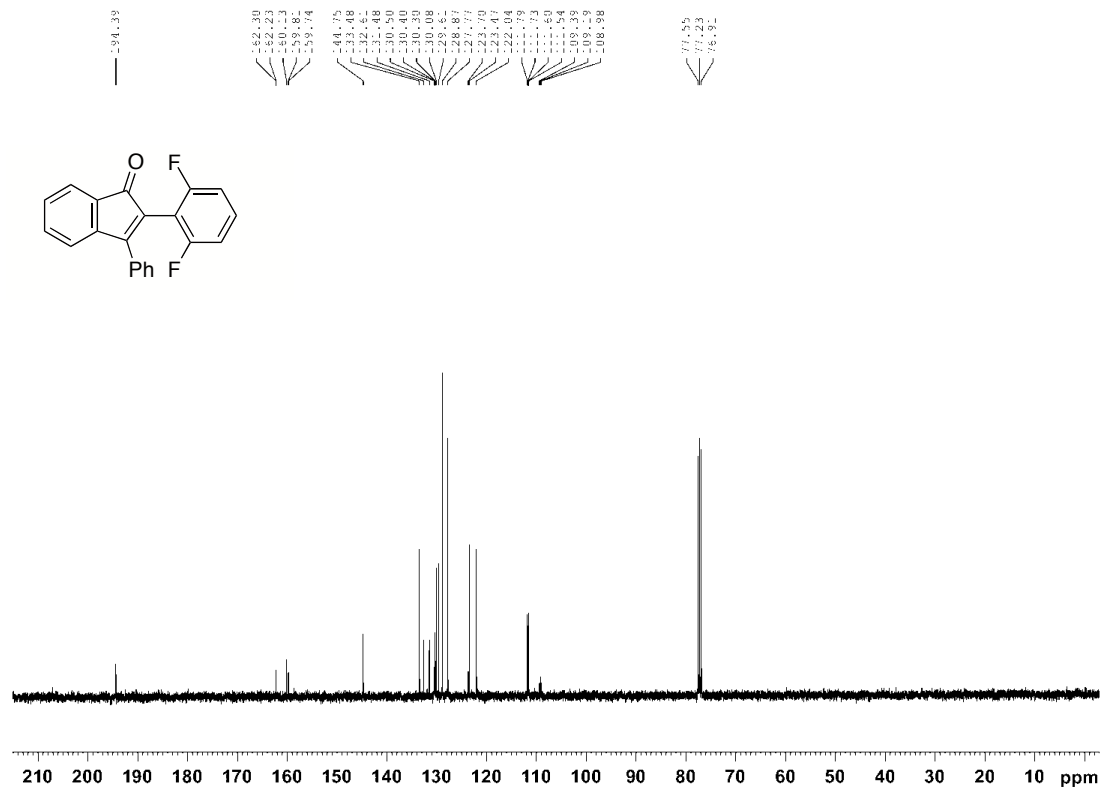

7f

GK04-176 <sup>1</sup>H NMR 400MHz BBFO2 CDC13

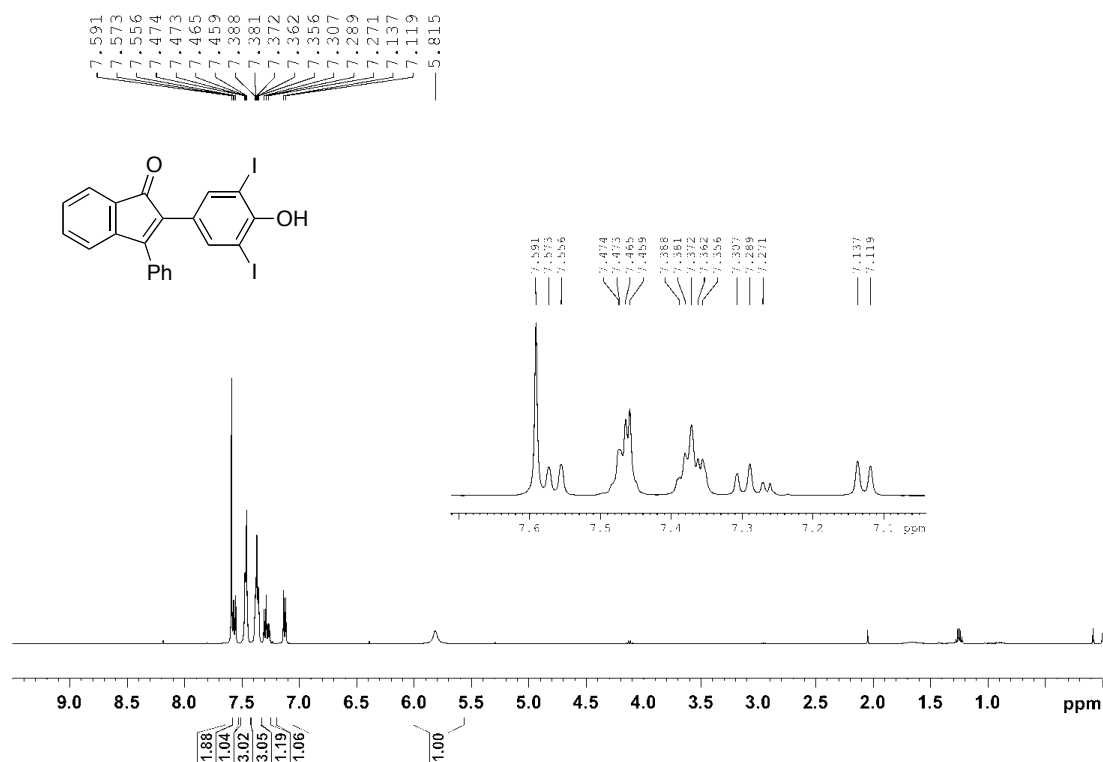

GK04-176 <sup>13</sup>C NMR 400MHz BBFO2 CDC13

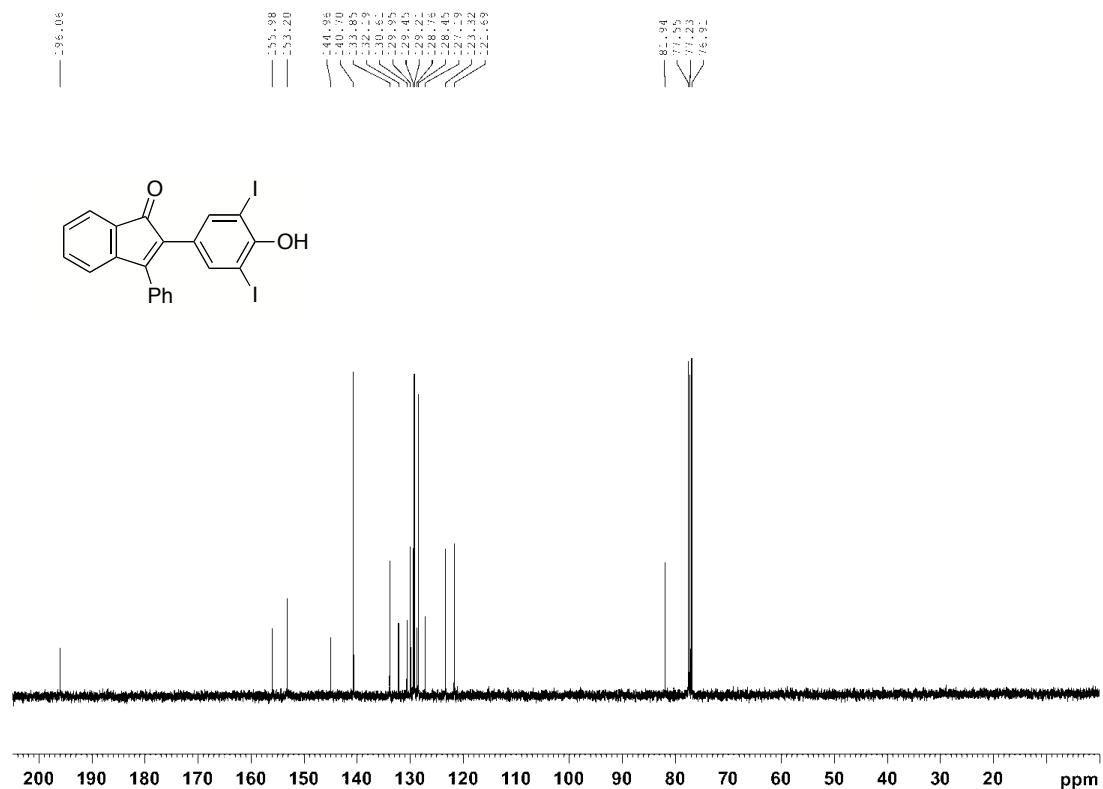

7g

GK04-207 <sup>1</sup>H NMR 400 MHz BBFO1 CDC13

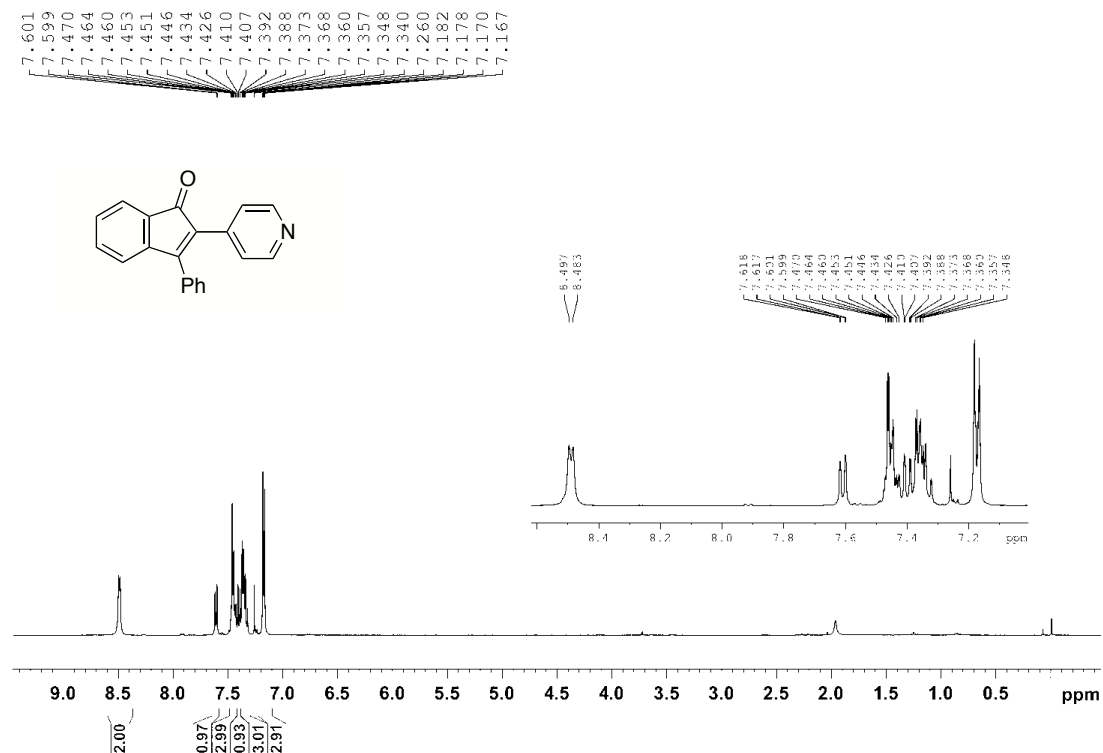

GK04-207 <sup>13</sup>C NMR 400 MHz BBFO1 CDC13

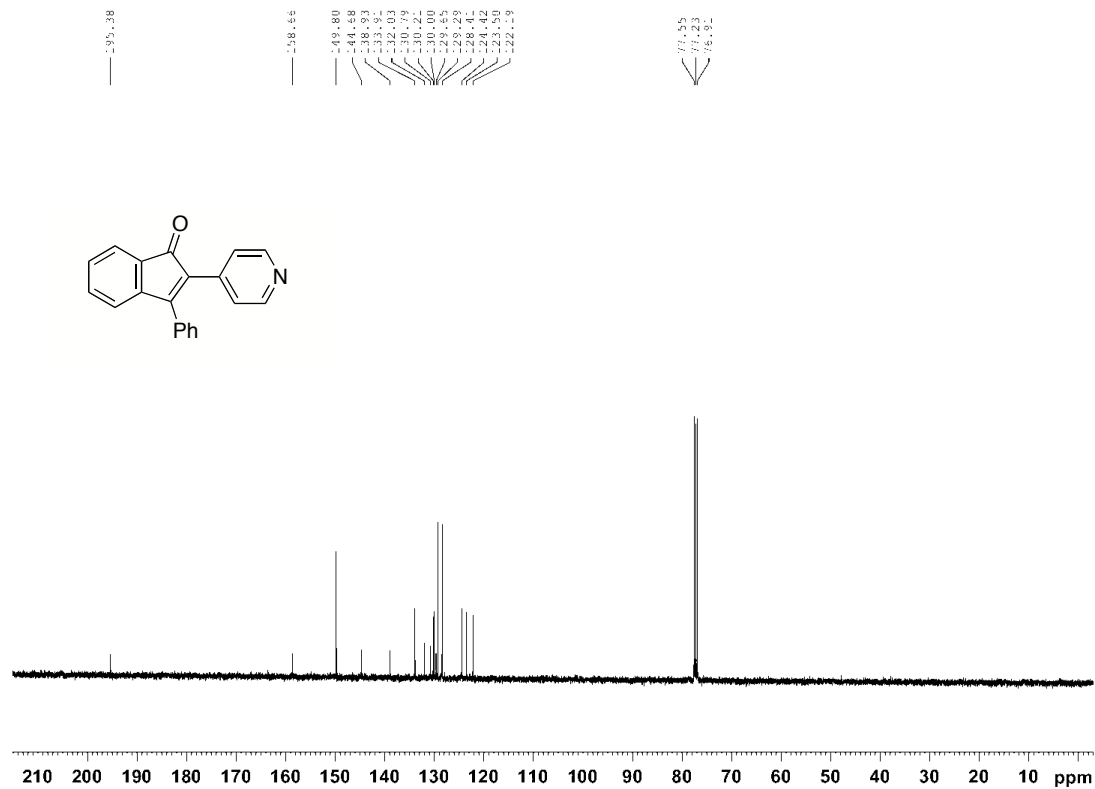

7h

GK04-186 <sup>1</sup>H NMR 400 MHz BBOF01 CDCl<sub>3</sub>

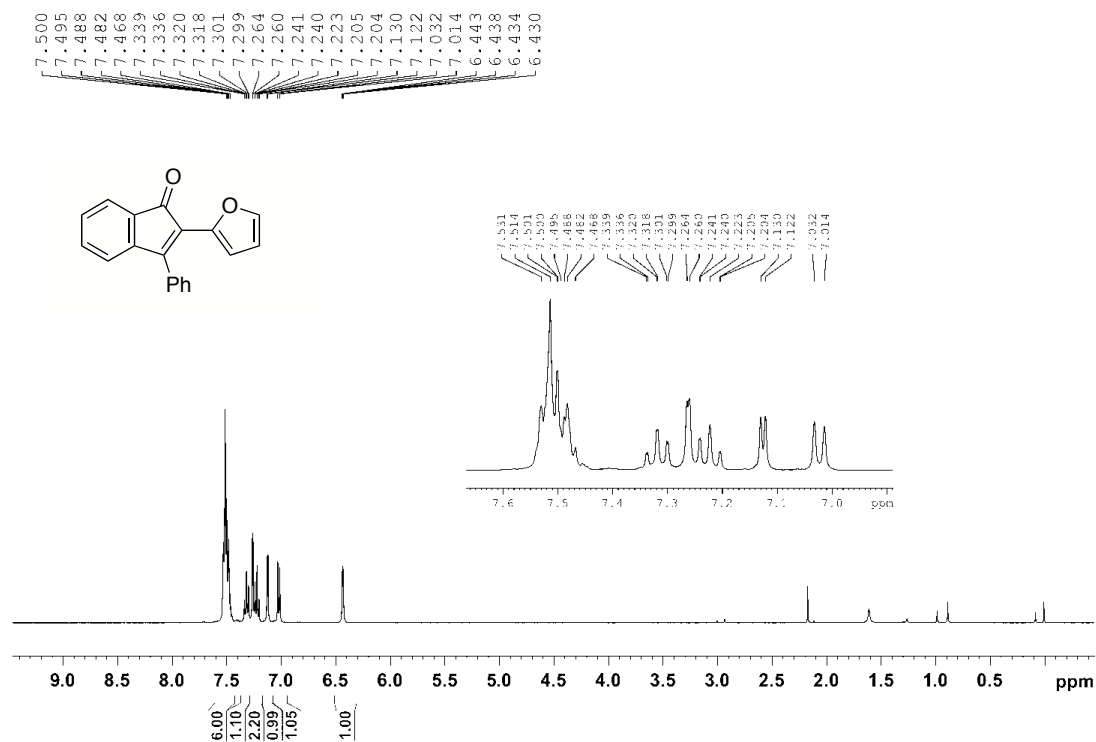

GK04-186 <sup>13</sup>C NMR 400 MHz BBOF01 CDCl<sub>3</sub>

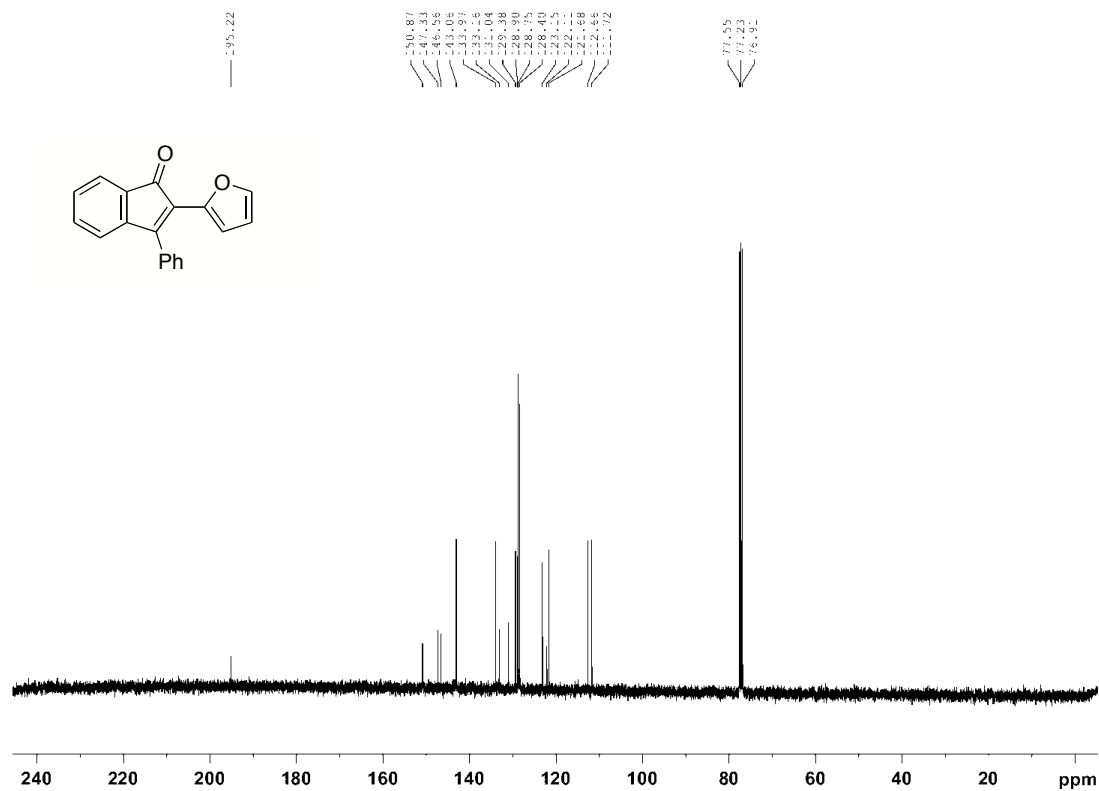

7i

GK04-195 <sup>1</sup>H NMR 400 MHz BBOF01 CDCl<sub>3</sub>

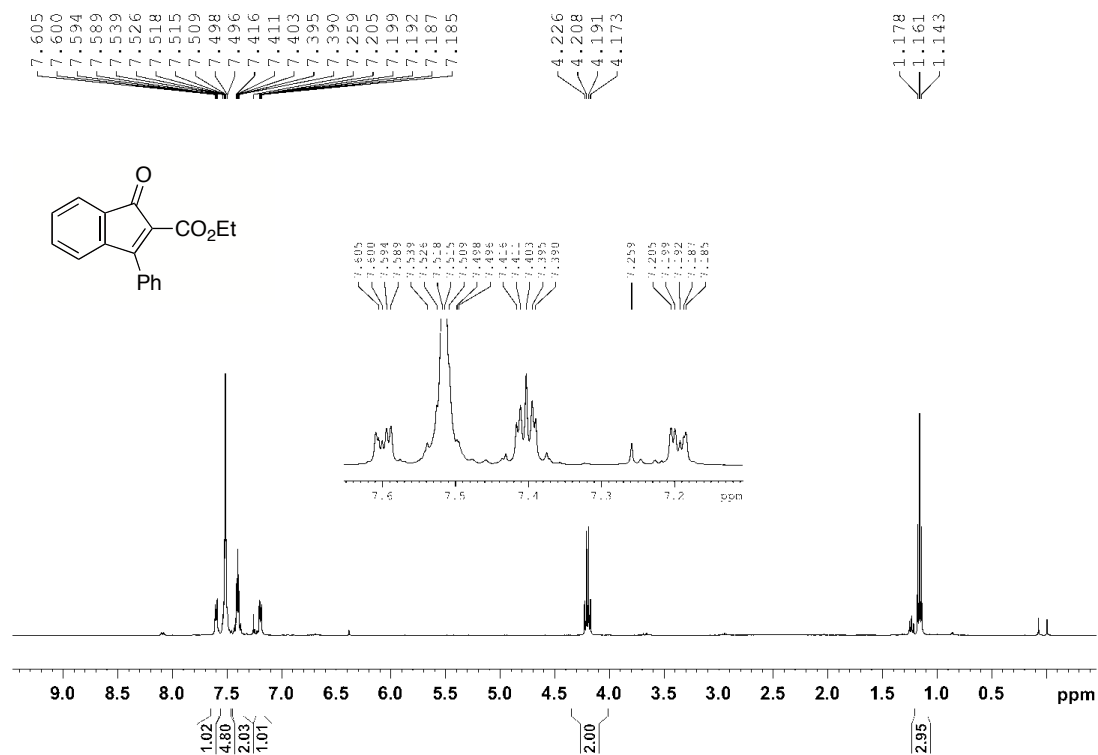

GK04-195 <sup>13</sup>C NMR 400 MHz BBOF01 CDCl<sub>3</sub>

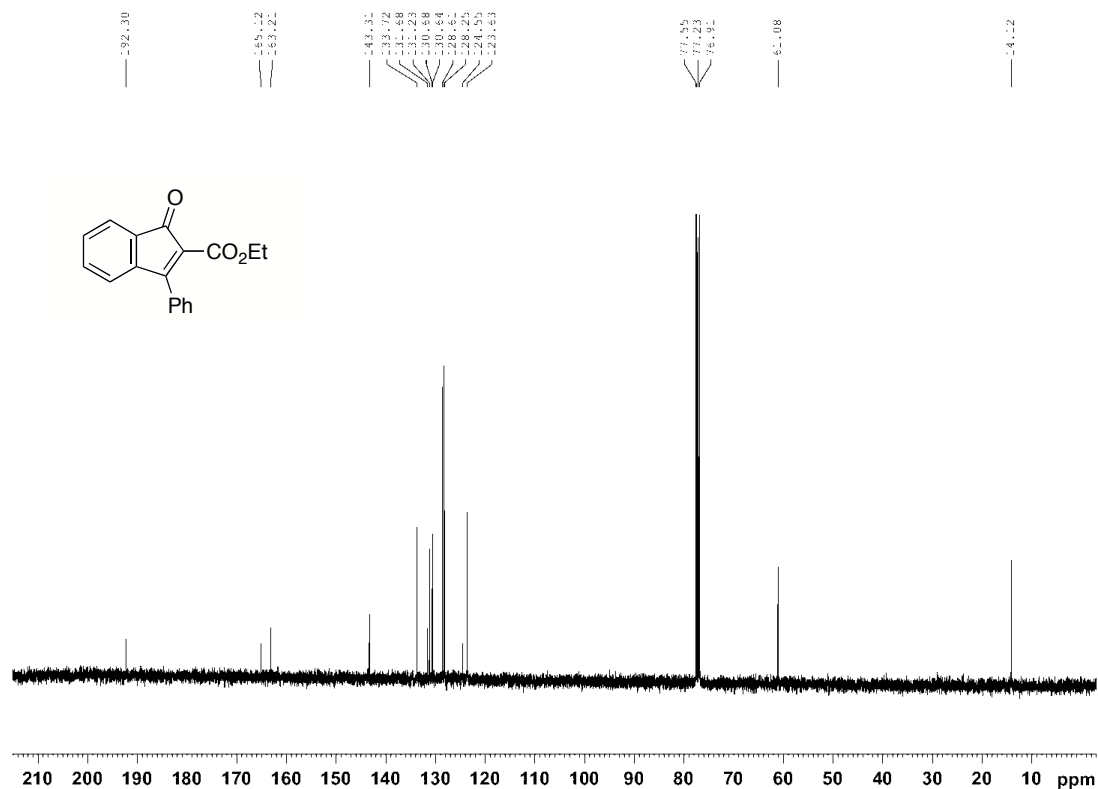

7j

GK04-81, <sup>1</sup>H NMR CDCl<sub>3</sub> 400MHz, BBFO1

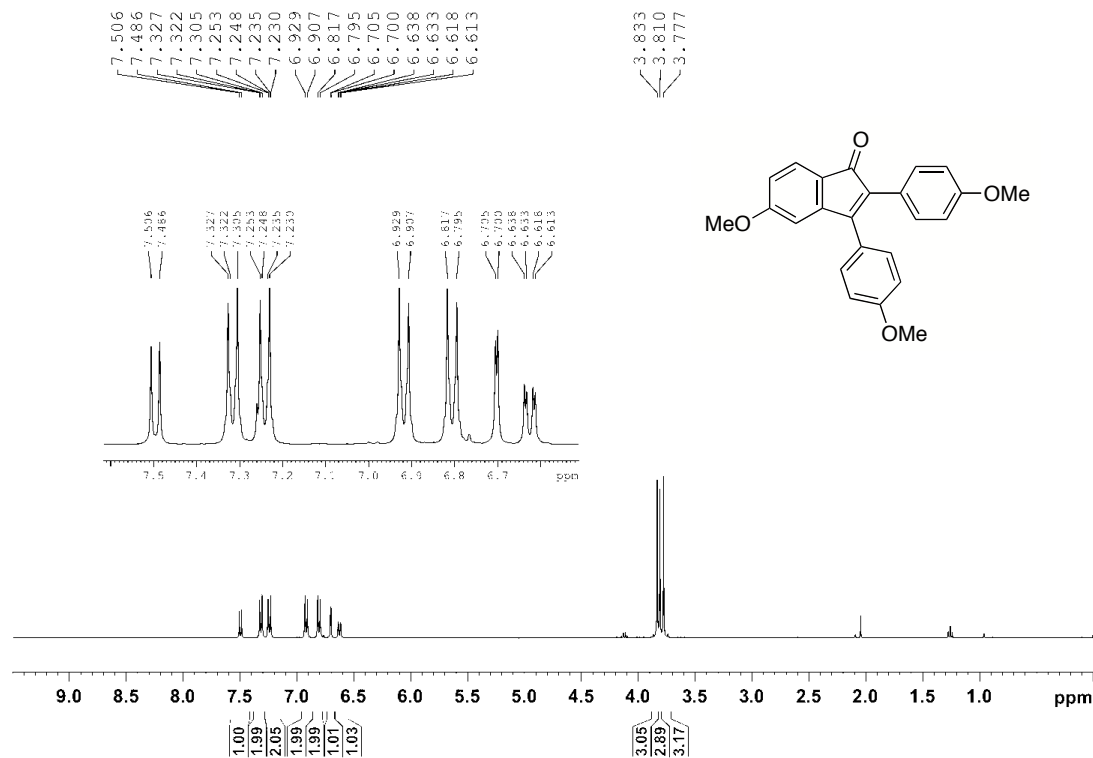

GK04-81, <sup>13</sup>C NMR CDCl<sub>3</sub> 400MHz, BBFO1

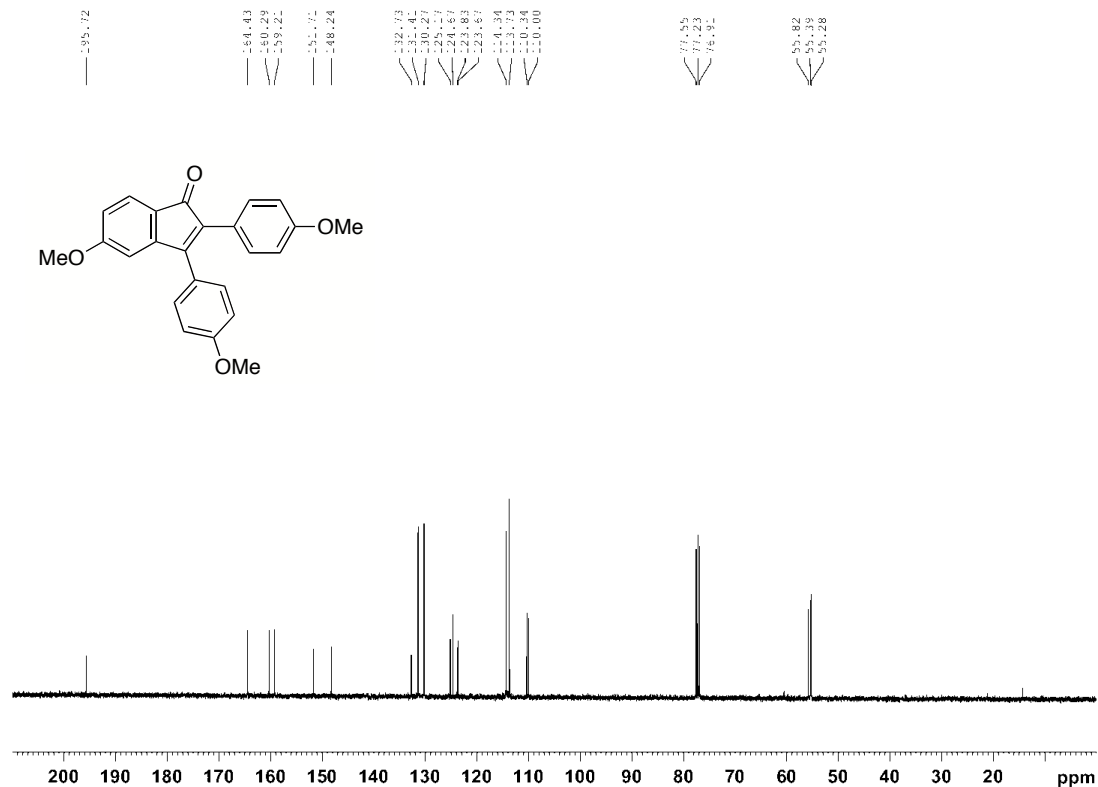

7k

GK04-110-1 1H NMR 400 MHz BBOF01 CDCl<sub>3</sub>

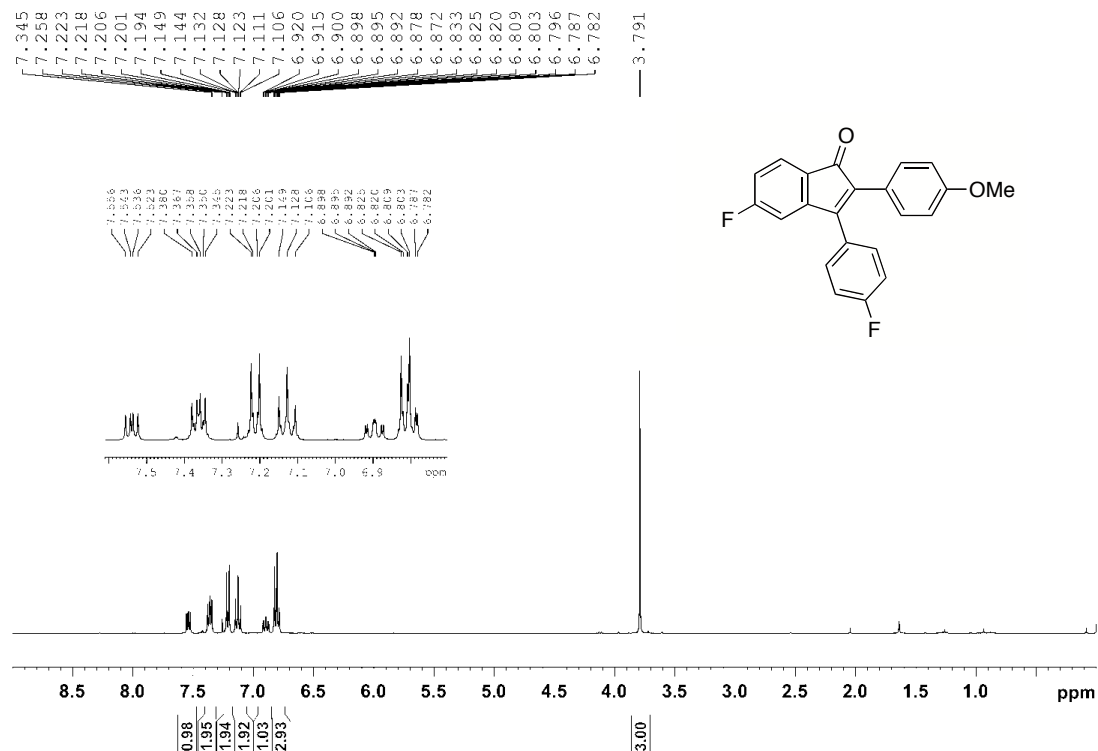

GK04-110-1 13C NMR 400 MHz BBOF01 CDCl<sub>3</sub>

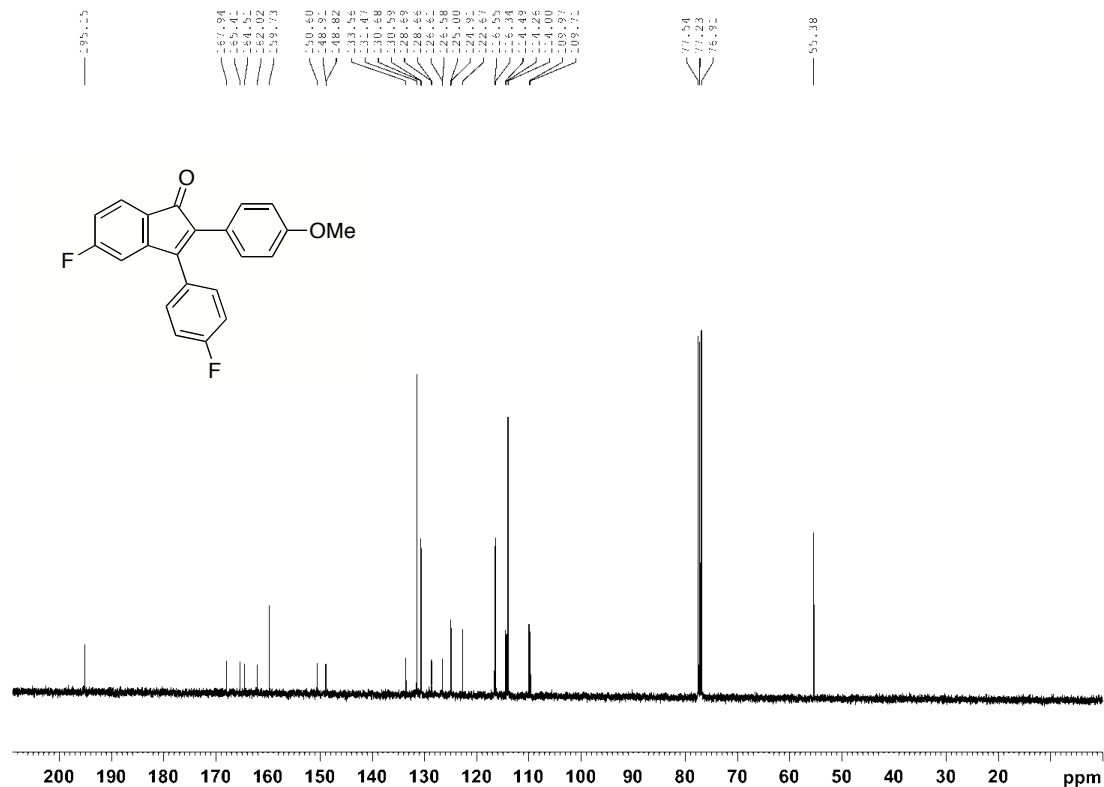

71

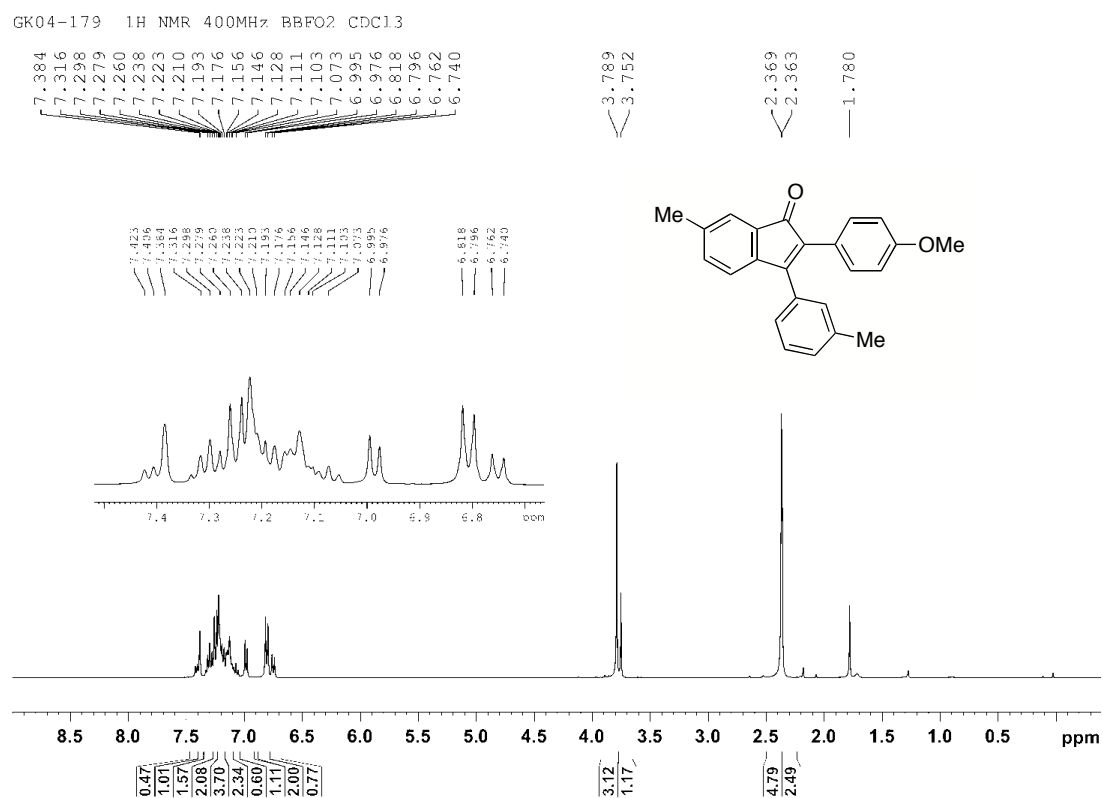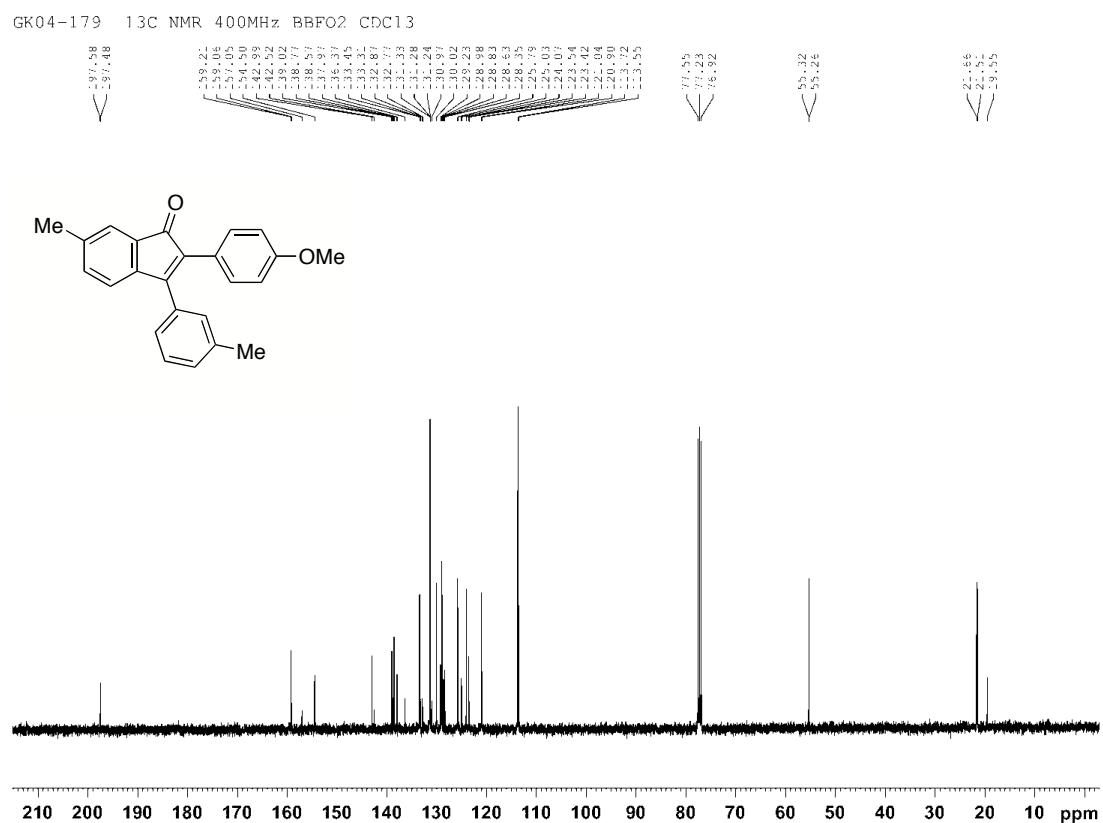

7m

GK04-188-1 1H NMR 400 MHz BBOF01 CDC13

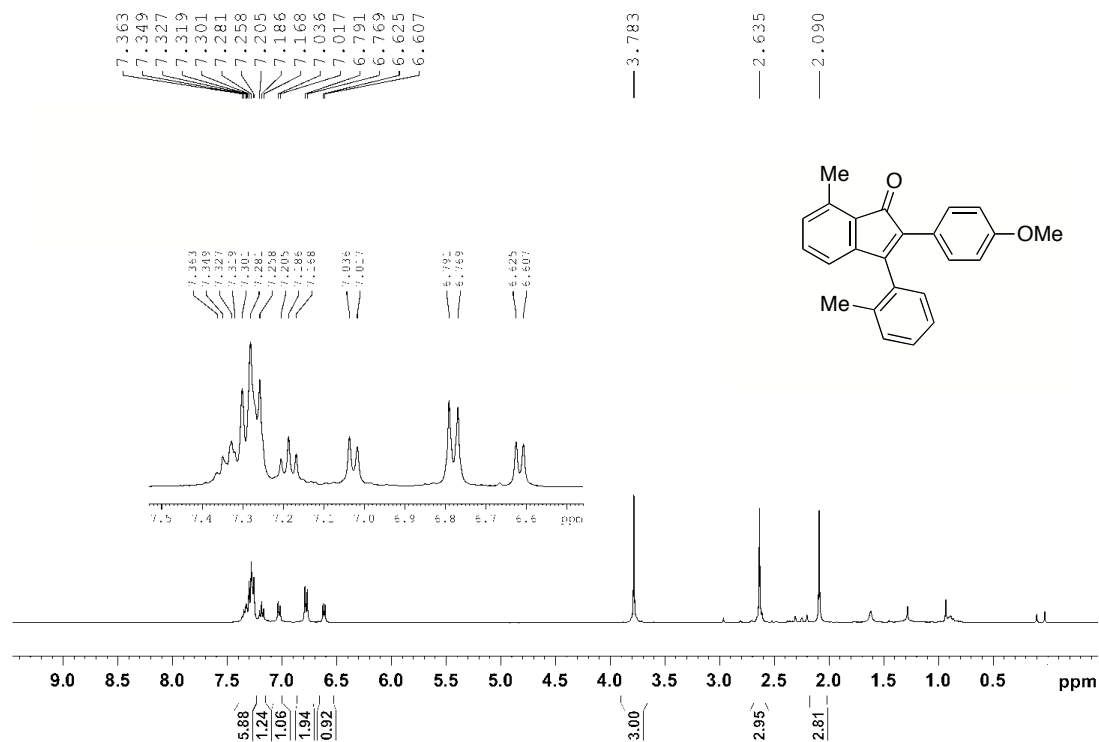

GK04-188-1 13C NMR 400 MHz BBOF01 CDC13

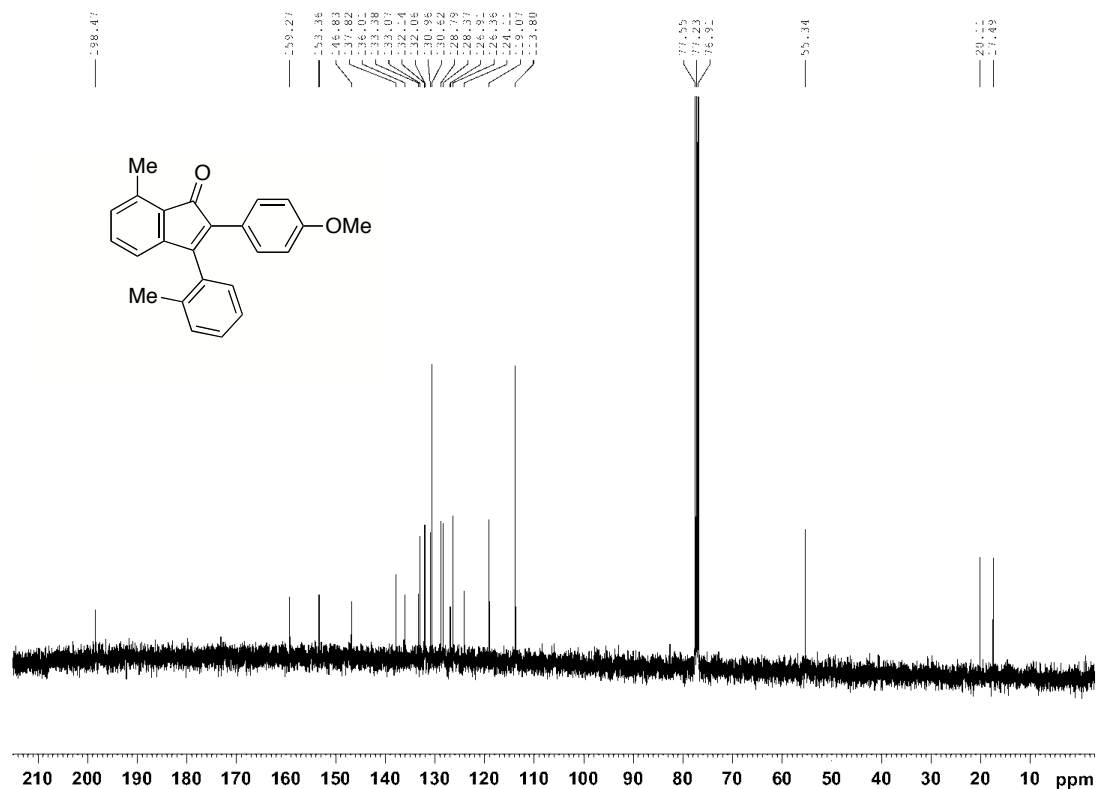

7n

GK04-206 <sup>1</sup>H NMR 400 MHz BBFO1 CDC13

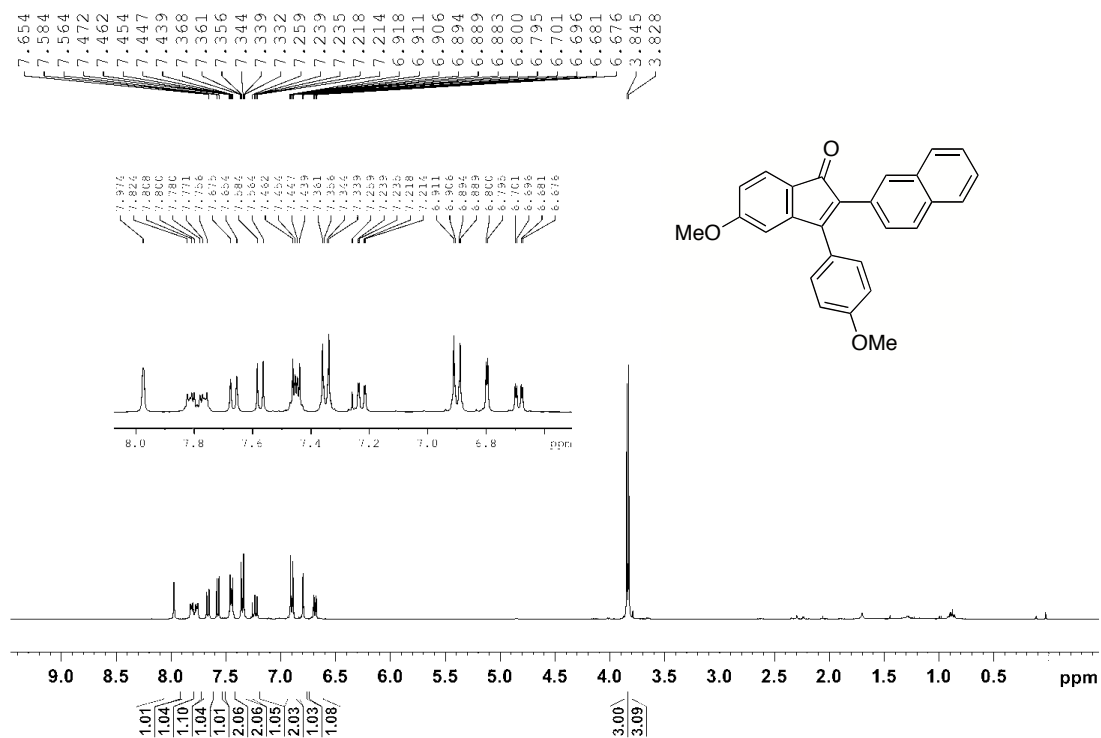

GK04-206 <sup>13</sup>C NMR 400 MHz BBFO1 CDC13

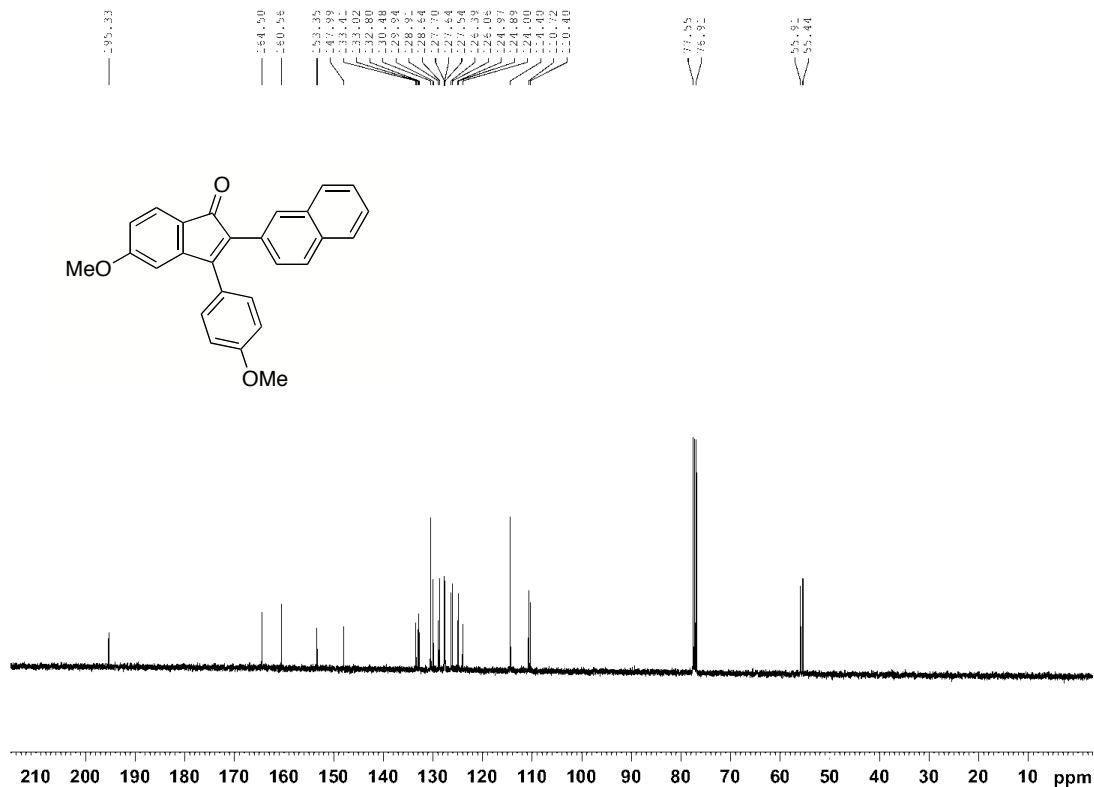

7o

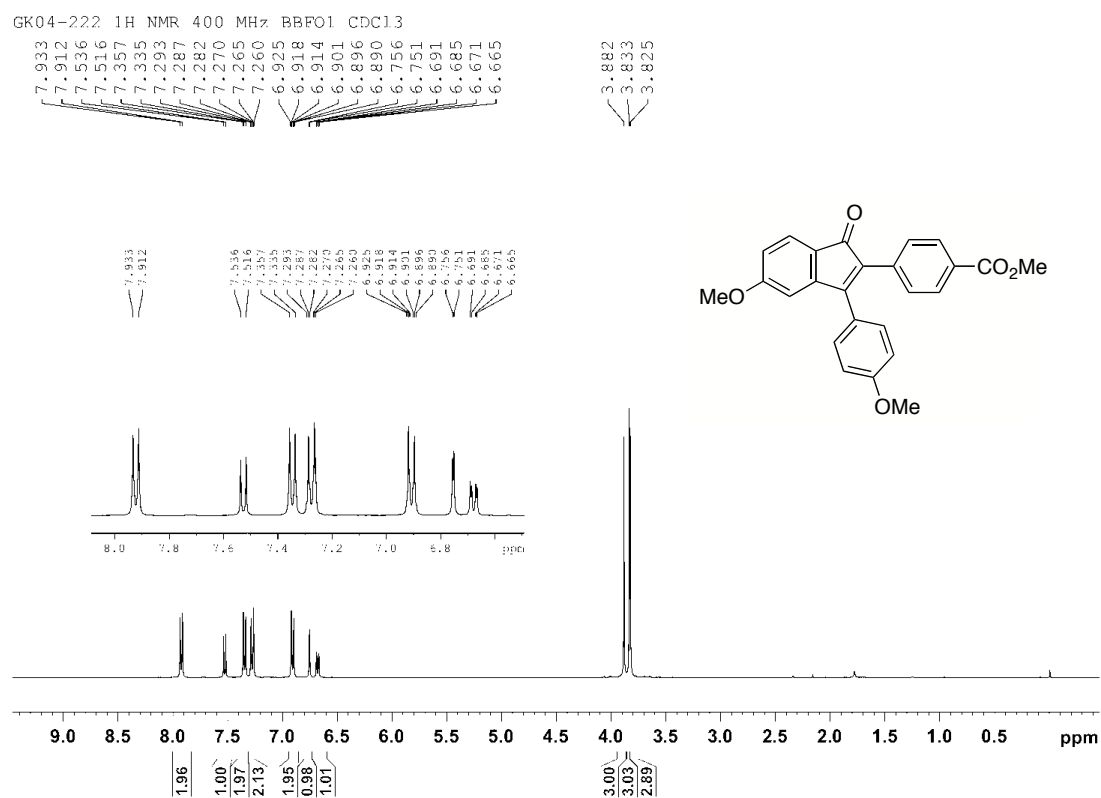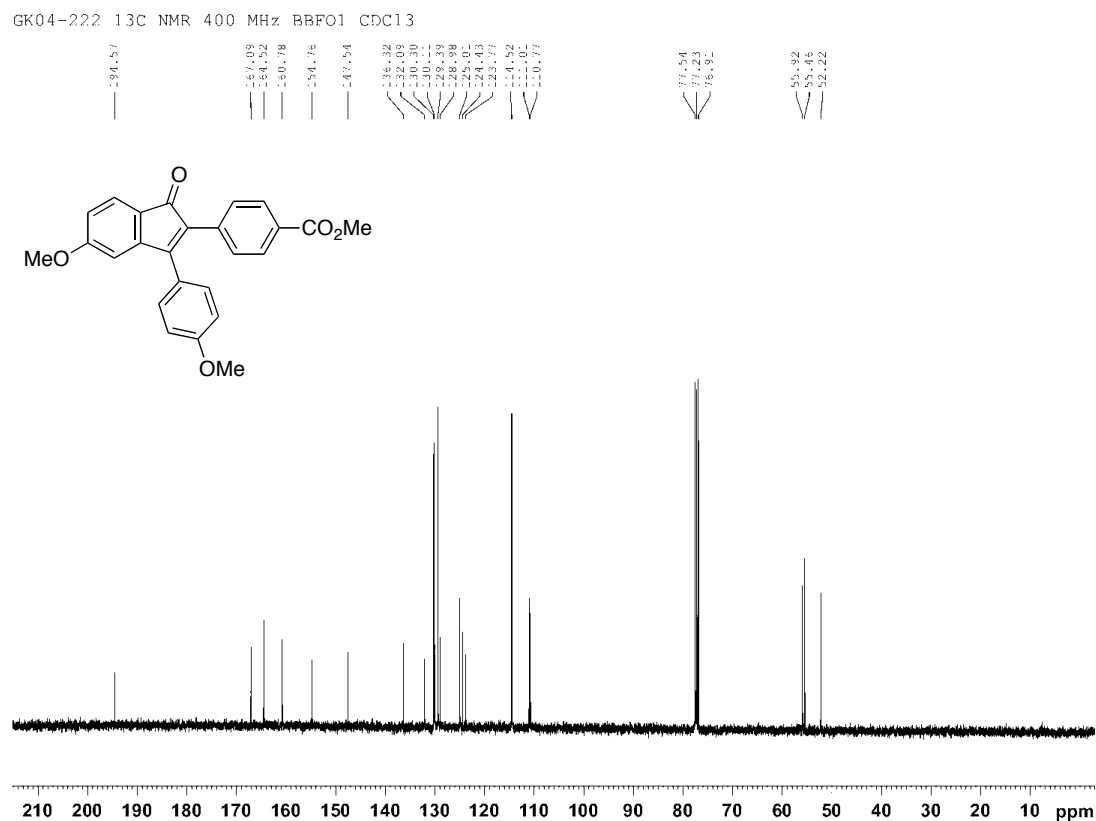

7p

GK04-238 <sup>1</sup>H NMR 400 MHz BBFO1 CDC13

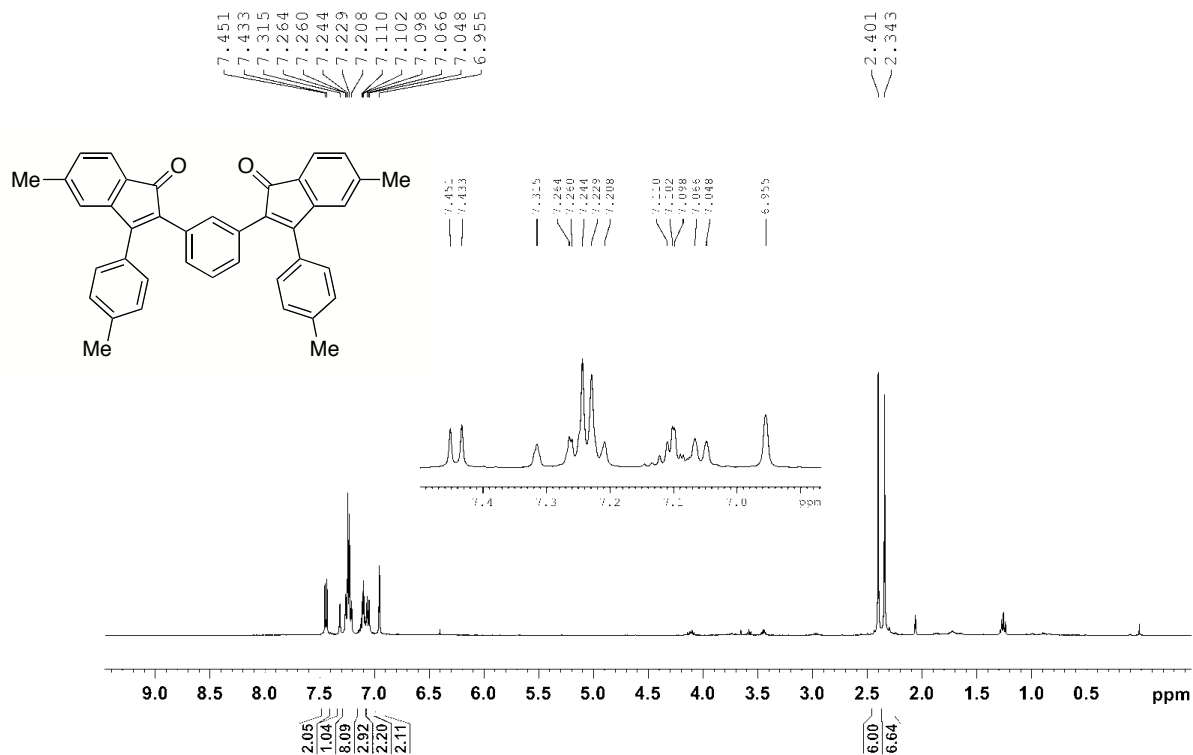

GK04-238 <sup>13</sup>C NMR 400 MHz BBFO1 CDC13

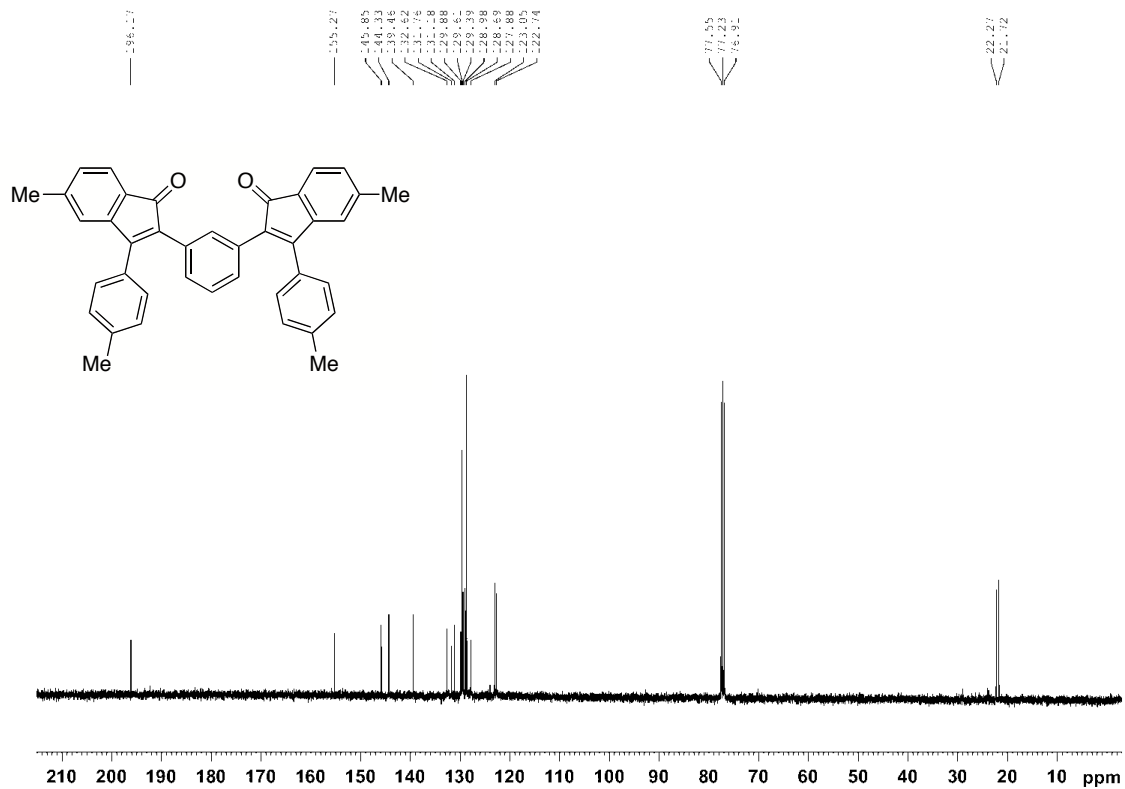

7q

GK04-237 <sup>1</sup>H NMR 400 MHz BBFO1 CDC13

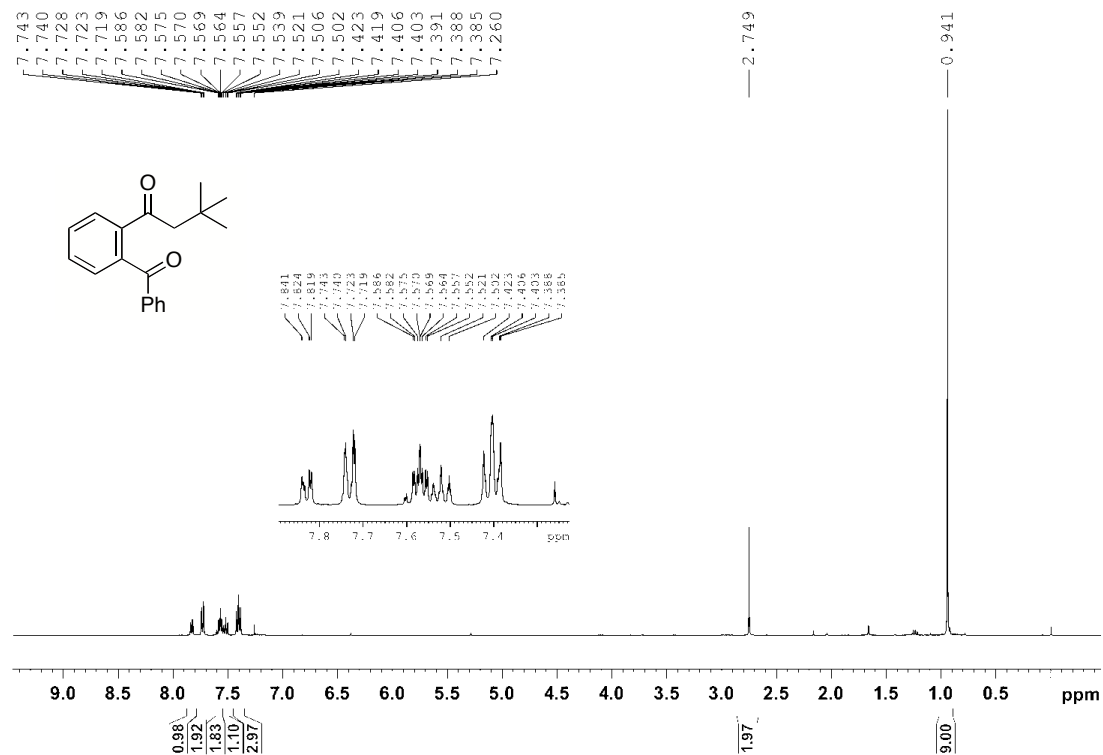

GK04-237 <sup>13</sup>C NMR 400 MHz BBFO1 CDC13

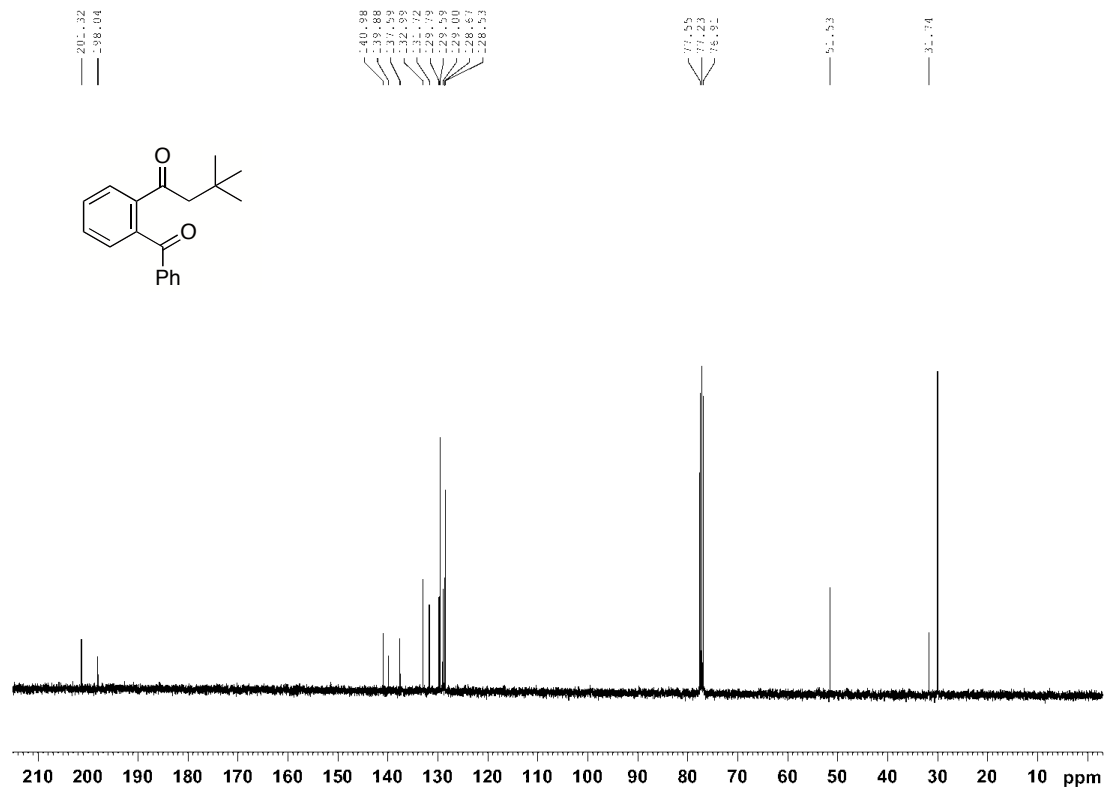

Supplement: c2cc31114c.pdf [file c2cc31114c.pdf]
